# Supplementary material for: Organic photoredox catalytic amino-heteroarylation of unactivated olefins to access distal amino ketones
Source: Royal Society of Chemistry journal article supplement (doi:10.1039/d1cc07189k), 2022-01-01
Supplement: d1cc07189k1.pdf [file d1cc07189k1.pdf]

# Supporting Information

## Organic Photoredox Catalytic Amino-heteroarylation of Unactivated Olefins to Access Distal Amino Ketones

Ji-Hua Zhang,<sup>[a]</sup> Teng-Fei Xiao,<sup>[a]</sup> Zi-Qin Ji,<sup>[a]</sup> Han-Nan Chen,<sup>[a]</sup> Pen-Ji Yan,<sup>[b]</sup> Yong-Chun Luo,<sup>[a]</sup> Peng-Fei Xu,<sup>[a][c]</sup> and Guo-Qiang Xu<sup>[a]\*</sup>

<sup>[a]</sup> State Key Laboratory of Applied Organic Chemistry, College of Chemistry and Chemical Engineering, Lanzhou University, Lanzhou 730000, P.R. China, E-mail: gqxu@lzu.edu.cn;

<sup>[b]</sup> College of Chemistry and Chemical Engineering, Key Laboratory of Hexi Corridor Resources Utilization of Gansu Universities, Hexi University, Zhangye 734000, P.R. China;

<sup>[c]</sup> State Key Laboratory of Veterinary Etiological Biology, College of Veterinary Medicine, Lanzhou University, Lanzhou 730000 (P.R. China).

### **This PDF file includes**

Materials and Methods

Figures S1 to S7

Tables S1 to S9

NMR Spectra

References

## Table of Contents

|                                                                              |     |
|------------------------------------------------------------------------------|-----|
| General information .....                                                    | 3   |
| Experimental Procedures.....                                                 | 4   |
| 1. Synthesis of substrates.....                                              | 4   |
| 1.1 Synthesis of N-protected 1-aminopyridinium salts .....                   | 4   |
| 1.2 Synthesis of heteroaryl-substituted tertiary bishomoallylic alcohols ... | 4   |
| 2. Synthesis of Photocatalyst .....                                          | 5   |
| 3. Screening of Reaction Conditions .....                                    | 6   |
| 4. General procedure for the synthesis of product and analytical data.....   | 8   |
| 5. The Gram Scale Reaction.....                                              | 26  |
| 6. Transformations of Product.....                                           | 27  |
| 7. Mechanistic Investigations .....                                          | 30  |
| 7.1 Luminescence Quenching Experiments .....                                 | 30  |
| 7.2 Capture of Radical Species.....                                          | 31  |
| 8. X-Ray Crystallographic Data of product 3ab.....                           | 33  |
| 9. Mechanistic Computational Analysis.....                                   | 34  |
| 10. NMR spectra of compound .....                                            | 68  |
| 11. References .....                                                         | 107 |

## General information

All glassware was thoroughly oven-dried. Chemicals and solvents were either purchased from commercial suppliers or purified by standard techniques. Thin-layer chromatography (TLC) plates were visualized by exposure to ultraviolet light and/or staining with phosphomolybdic acid followed by heating on a hot plate. Flash chromatography was carried out using silica gel (200-300 mesh).  $^1\text{H}$  NMR and  $^{13}\text{C}$  NMR spectra were recorded on a Bruker AM-400 (400 MHz) or Agilent Inova 600 MHz. The spectra were recorded in  $\text{CDCl}_3$  as solvent at room temperature,  $^1\text{H}$  and  $^{13}\text{C}$  NMR chemical shifts are reported in ppm relative to the residual solvent peak. The residual solvent signals were used as references and the chemical shifts were converted to the TMS scale ( $\text{CDCl}_3$ :  $\delta_{\text{H}} = 7.26$  ppm,  $\delta_{\text{C}} = 77.00$  ppm). Data for  $^1\text{H}$  NMR are reported as follows: chemical shift ( $\delta$  ppm), multiplicity (s = singlet, d = doublet, t = triplet, q=quartet, m = multiplet, dd = doublet), integration, coupling constant (Hz) and assignment. Data for  $^{13}\text{C}$  NMR are reported as chemical shift. HRMS were performed on a Bruker Apex II mass instrument (ESI).

# Experimental Procedures

## 1. Synthesis of substrates

### 1.1 Synthesis of N-protected 1-aminopyridinium salts

N-protected 1-aminopyridinium salts were synthesized according to reported procedures with some modifications.<sup>1</sup>

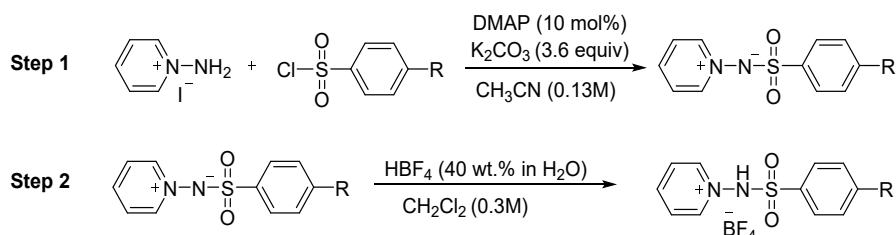

#### General Procedure:

**Step 1:** To a mixture of 1-aminopyridinium iodide (1 equiv) and distilled-CH<sub>3</sub>CN (0.13 M) were added DMAP (10 mol%), K<sub>2</sub>CO<sub>3</sub> (3.6 equiv) and sulfonyl chloride (1 equiv) at 0 °C (ice water bath) under N<sub>2</sub>. Then, the cooling bath was removed and the reaction mixture was stirred at rt for 6 h. The suspension was filtered and concentrated in vacuo. The residue was suspended in CH<sub>2</sub>Cl<sub>2</sub> and filtered to remove inorganic impurities. After the solvent was removed under reduced pressure, the crude product was purified by silica gel flash column chromatography (CH<sub>2</sub>Cl<sub>2</sub>/MeOH = 10/1) and washed with a small amount of CH<sub>2</sub>Cl<sub>2</sub> to afford aminopyridinium ylide.

**Step 2:** The ylide product (1 equiv) was diluted with CH<sub>2</sub>Cl<sub>2</sub> (0.3M) and tetrafluoroboric acid solution (40 wt.% in H<sub>2</sub>O) (1.3 equiv) was added to the solution at rt. The mixture was stirred for 30 min, then the product was precipitated. The mixture was filtered, washed with diethyl ether and pentane, and dried in vacuo. The pure product was obtained as a white solid.

### 1.2 Synthesis of heteroaryl-substituted tertiary bishomoallylic alcohols

Heteroaryl-substituted tertiary bishomoallylic alcohols were synthesized according to reported procedures with modifications.<sup>2</sup>

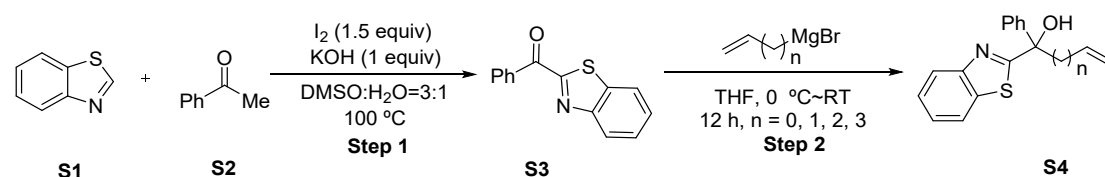

### General procedure:

**Step 1:** A mixture of acetophenone **S2** (1.0 mmol), benzothiazole **S1** (1.5 mmol), I<sub>2</sub> (1.5 mmol), and KOH (1.0 mmol) in solvent 4.0 mL (DMSO/H<sub>2</sub>O = 3:1) was stirred at 100 °C (oil bath). After the disappearance of the reactant (monitored by TLC), 50 mL of water was added to the mixture, which was then extracted with ethyl acetate 3 times (3 × 20.0 mL). The extract was washed with Na<sub>2</sub>S<sub>2</sub>O<sub>3</sub> solution, dried over anhydrous Na<sub>2</sub>SO<sub>4</sub>, and evaporated. The residue was purified by column chromatography on silica gel and eluted with ethyl acetate/petroleum ether (1/50) to afford yellow solid **S3** in 78% yield (0.19 g).

**Step 2:** To an oven-dried 100 mL double-neck round bottom flask, vinyl magnesium bromide (3.0 equiv) was added dropwise to a solution of ketone **S3** (1.0 equiv) in dry THF (0.2 M) under N<sub>2</sub> atmosphere at 0 °C (ice water bath). The resulting mixture was warmed gradually to room temperature and stirred for 6 – 8 h. After completion of the reaction, the reaction mixture was quenched with a saturated NH<sub>4</sub>Cl solution, extracted with ethyl acetate, and dried before being purified on a silica column using an eluent of ethyl acetate/petroleum ether (1/20) to afford the desired product **S4**.

## 2. Synthesis of Photocatalyst <sup>3</sup>

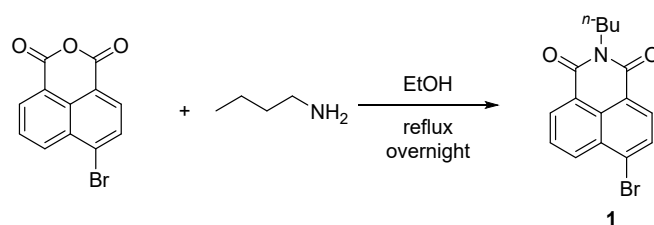

**General procedure:** 4-Bromo-1,8-naphthalic anhydride (3.0 g, 10.83 mmol) was dissolved in distilled ethanol (150 mL). n-Butylamine (1.28 mL, 12.99 mmol) was added to the solution, and then the solution was refluxed overnight under nitrogen. The solution was cooled and the precipitate was filtered with no further purification. The product was an ivory powder (2.94 g, 82% yield)

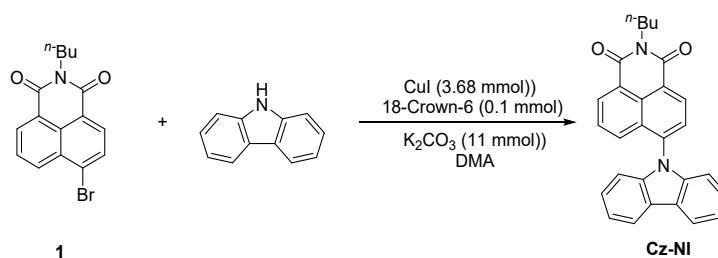

CuI (0.7 g, 3.68 mmol), 18-crown-6 (0.026 g, 0.1 mmol), K<sub>2</sub>CO<sub>3</sub> (1.53 g, 11 mmol), carbazole (0.47 g, 2.8 mmol) dissolved in DMA (10 mL) and the mixture was stirred at 165 °C (oil bath) under argon. After 2 h a solution of **1** (0.5 g, 1.4 mmol) in hot DMA (5 mL) was added into the mixture slowly. The final mixture was heated to reflux for 16 h. The reaction solution was poured into 500 ml of ice water and the precipitated crude product was collected, dried and purified by column chromatography (silica gel, 1/20; PE/EA). Cz-NI was obtained as a yellow solid in 43% yield; mp = 136 – 137 °C.

### 3. Screening of Reaction Conditions

**Table S1.** Optimization of the photocatalyst. <sup>a</sup>

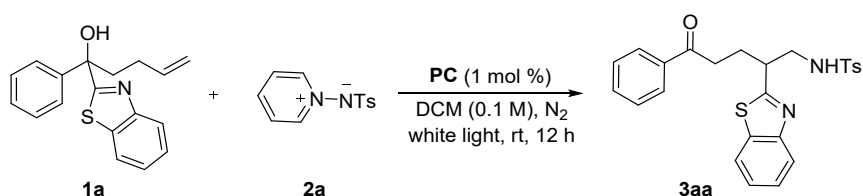

| Entry | PC (mol %)                                                     | Yield (%) <sup>b</sup> |
|-------|----------------------------------------------------------------|------------------------|
| 1     | Cz-NI                                                          | 44                     |
| 2     | 4CzIPN                                                         | 19                     |
| 3     | Ir(ppy) <sub>3</sub>                                           | 27                     |
| 4     | Ru(bpy) <sub>3</sub> (PF <sub>6</sub> ) <sub>2</sub>           | 4                      |
| 5     | [Ir(dtbbpy)(ppy) <sub>2</sub> ](PF <sub>6</sub> ) <sub>3</sub> | 34                     |

<sup>a</sup> Reaction condition: **1a** (0.1 mmol), **2a** (0.1 mmol), and PC (1 mol %) in DCM (1 mL) at 25 °C for 12 h under irradiation with white light. <sup>b</sup> Isolated yield.

**Table S2.** Optimization of solvent. <sup>a</sup>

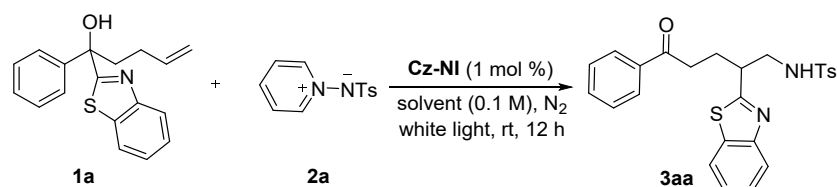

| Entry | Solvent | Yield (%) <sup>b</sup> |
|-------|---------|------------------------|
| 1     | THF     | 26                     |

|   |                    |       |
|---|--------------------|-------|
| 2 | CHCl <sub>3</sub>  | 52    |
| 3 | DCE                | 55    |
| 4 | n-hexane           | 14    |
| 5 | CH <sub>3</sub> CN | 11    |
| 6 | CCl <sub>4</sub>   | Trace |
| 7 | EA                 | Trace |

<sup>a</sup> Reaction condition: **1a** (0.1 mmol), **2a** (0.1 mmol), and **Cz-NI** (1 mol %) in Solvent (1 mL) at 25 °C for 12 h under irradiation with white light. <sup>b</sup> Isolated yield.

**Table S3.** Optimization of the loading of **1a**. <sup>a</sup>

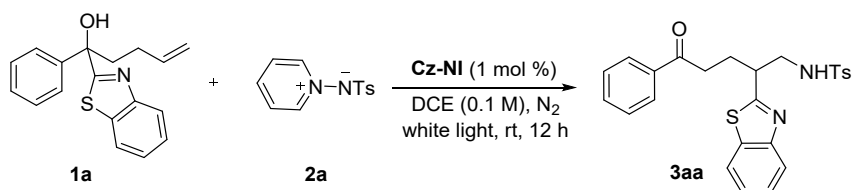

| Entry | <b>1a</b> | Yield (%) <sup>b</sup> |
|-------|-----------|------------------------|
| 1     | 1.2 equiv | 67                     |
| 2     | 1.4 equiv | 81                     |
| 3     | 1.5 equiv | 83                     |
| 4     | 1.6 equiv | 84                     |
| 5     | 1.8 equiv | 77                     |

<sup>a</sup> Reaction condition: **1a**, **2a** (0.1 mmol), and **Cz-NI** (1 mol %) in DCE (1 mL) at 25 °C for 12 h under irradiation with white light. <sup>b</sup> Isolated yield.

**Table S4.** Optimization of concentration. <sup>a</sup>

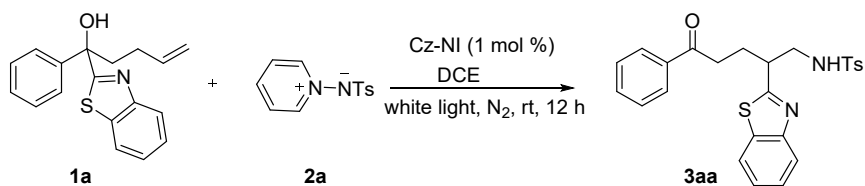

| Entry | DCE | Yield (%) <sup>b</sup> |
|-------|-----|------------------------|
|-------|-----|------------------------|

|   |        |    |
|---|--------|----|
| 1 | 0.5 ml | 84 |
| 2 | 2 ml   | 91 |
| 3 | 4 ml   | 92 |
| 4 | 6 ml   | 84 |

<sup>a</sup> Reaction condition: **1a** (0.16 mmol), **2a** (0.1 mmol), and **Cz-NI** (1 mol %) in DCE at 25 °C for 12 h under irradiation with white light. <sup>b</sup> Isolated yield.

**Table S5.** Optimization of reaction time. <sup>a</sup>

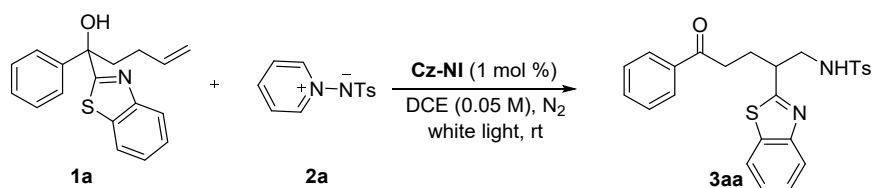

| Entry | Time | Yield (%) <sup>b</sup> |
|-------|------|------------------------|
| 1     | 6 h  | 60                     |
| 2     | 8 h  | 81                     |
| 3     | 9 h  | 96                     |
| 4     | 10 h | 92                     |
| 5     | 12 h | 91                     |
| 6     | 18 h | 90                     |
| 7     | 24 h | 91                     |

<sup>a</sup> Reaction condition: **1a** (0.16 mmol), **2a** (0.1 mmol), and **Cz-NI** (1 mol %) in DCE (2 ml) at 25 °C under irradiation with white light. <sup>b</sup> Isolated yield.

#### 4. General procedure for the synthesis of products and analytical data

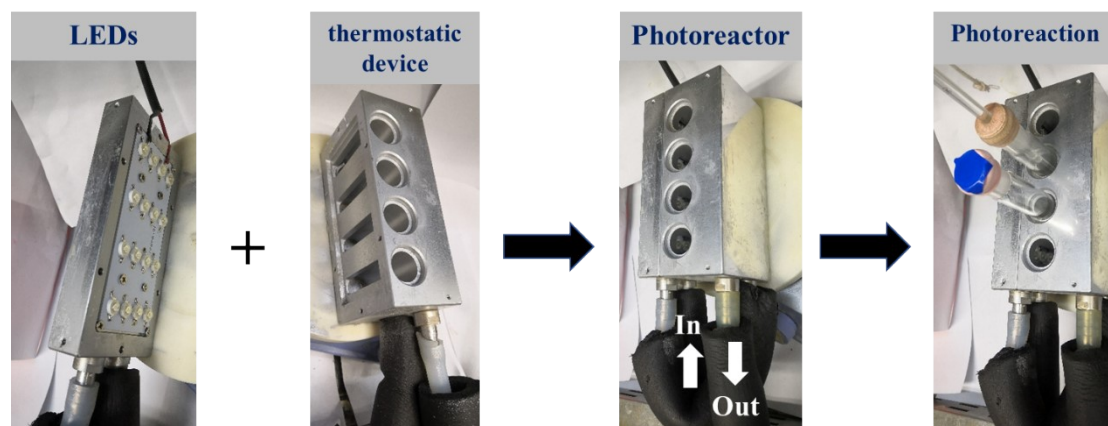

**Figure S1.** Thermostatic photoreaction device



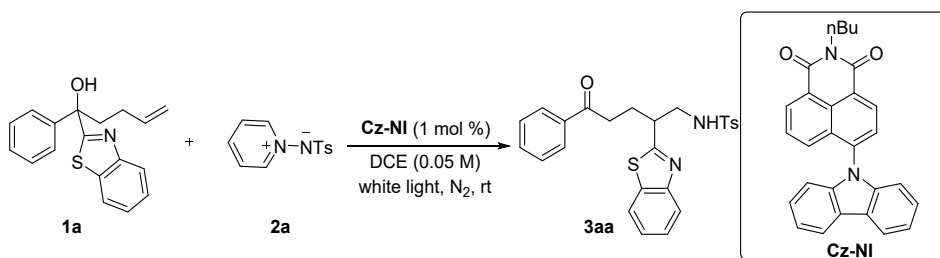

**General catalysis procedure:** A dried 10 mL reaction tube was charged with the photocatalyst (0.001 mmol, 0.42 mg), the heteroaryl-substituted tertiary bishomoallylic alcohol **1a** (0.16 mmol, 1.6 equiv), N-protected 1-aminopyridinium **2a** (0.1 mmol, 1 equiv) and 2.0 mL DCE. The reaction mixture was degassed by three cycles of freeze-pump-thaw. After the mixture was thoroughly degassed, the vial was placed beside a white LED light. The reaction was stirred at 25 °C for 9 h. After completion of the reaction as checked by TLC. The reaction mixture was purified by silica gel flash column chromatography (petroleum ether/EtOAc) to give the corresponding product **3aa**.

**N-(2-(benzo[*d*]thiazol-2-yl)-5-oxo-5-phenylpentyl)-4-methylbenzenesulfonamide (3aa)**

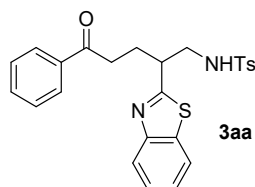

Following the general procedure, compound **3aa** was obtained as a yellow oil in 96% yield (44.6 mg);  $R_f = 0.48$  (PE/EA = 1/1).

**<sup>1</sup>H NMR (400 MHz, CDCl<sub>3</sub>):**  $\delta$  7.89 (dd,  $J = 13.7, 5.2$  Hz, 3H), 7.80 (d,  $J = 8.1$  Hz, 1H), 7.69 (d,  $J = 7.5$  Hz, 2H), 7.57 – 7.49 (m, 1H), 7.48 – 7.30 (m, 4H), 7.18 (d,  $J = 6.6$  Hz, 2H), 5.91 – 5.69 (m, 1H), 3.69 – 3.15 (m, 3H), 3.08 – 2.86 (m, 2H), 2.34 (s, 3H), 2.27 (dd,  $J = 12.8, 6.7$  Hz, 2H).

**<sup>13</sup>C NMR (151 MHz, CDCl<sub>3</sub>):**  $\delta$  198.9, 172.3, 152.7, 143.3, 136.7, 136.5, 134.5, 133.2, 129.6, 128.6, 128.0, 126.9, 126.2, 125.2, 122.8, 121.6, 45.8, 42.9, 35.2, 26.9, 21.4.

**HRMS (ESI-TOF)  $m/z$ :**  $[M+H]^+$  calcd for C<sub>25</sub>H<sub>25</sub>N<sub>2</sub>O<sub>3</sub>S<sub>2</sub> 465.1301, found: 465.1304.

**N-(2-(benzo[*d*]thiazol-2-yl)-5-oxo-5-(4-methoxyphenyl)pentyl)-4-methylbenzenesulfonamide (3ab)**

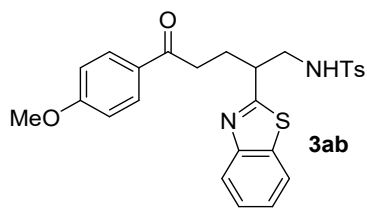

Following the general procedure, compound **3ab** was obtained as a white solid in 85% yield (42.0 mg); mp= 111 – 112 °C;  $R_f$ = 0.36 (PE/EA = 1/1).

**$^1\text{H}$  NMR (400 MHz,  $\text{CDCl}_3$ ):**  $\delta$  7.94 (dt,  $J$  = 8.2, 0.9 Hz, 1H), 7.91 – 7.86 (m, 2H), 7.85 – 7.80 (m, 1H), 7.73 – 7.67 (m, 2H), 7.48 (m,  $J$  = 8.3, 7.2, 1.2 Hz, 1H), 7.38 (m,  $J$  = 8.2, 7.2, 1.2 Hz, 1H), 7.20 (d,  $J$  = 8.0 Hz, 2H), 6.94 – 6.87 (m, 2H), 5.67 (d,  $J$  = 6.0 Hz, 1H), 3.86 (s, 3H), 3.49 – 3.36 (m, 3H), 2.99 (t,  $J$  = 7.1 Hz, 2H), 2.36 (s, 3H), 2.27 (m,  $J$  = 6.8, 4.5 Hz, 2H).

**$^{13}\text{C}$  NMR (101 MHz,  $\text{CDCl}_3$ ):**  $\delta$  197.5, 172.5, 163.6, 152.7, 143.3, 136.8, 134.6, 130.3, 129.7, 128.6, 127.9, 126.2, 125.2, 122.8, 121.6, 114.1, 77.3, 77.0, 76.7, 55.4, 45.8, 42.9, 34.81, 27.1, 21.4.

**HRMS (ESI-TOF) m/z:**  $[\text{M}+\text{H}]^+$  calcd for  $\text{C}_{26}\text{H}_{27}\text{N}_2\text{O}_4\text{S}_2$  495.1407, found:495.1409.

**N-(2-(benzo[*d*]thiazol-2-yl)-5-oxo-5-(4-fluorophenyl)pentyl)-4-methylbenzenesulfonamide (3ac)**

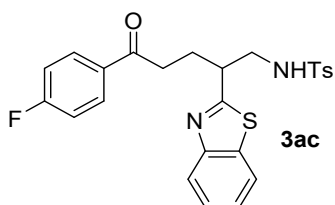

Following the general procedure, compound **3ac** was obtained as a yellow solid in 80% yield (38.6 mg); mp = 104 – 105 °C;  $R_f$ = 0.55 (PE/EA = 1/1).

**$^1\text{H}$  NMR (400 MHz,  $\text{CDCl}_3$ ):**  $\delta$  7.95 (d,  $J$  = 2.4 Hz, 1H), 7.94 – 7.90 (m, 2H), 7.83 (dt,  $J$  = 8.0, 0.9 Hz, 1H), 7.74 – 7.67 (m, 2H), 7.48 (m,  $J$  = 8.3, 7.2, 1.3 Hz, 1H), 7.39 (m,  $J$  = 8.3, 7.2, 1.2 Hz, 1H), 7.24 – 7.19 (m, 2H), 7.14 – 7.07 (m, 2H), 5.60 (t,  $J$  = 5.9 Hz, 1H), 3.51 – 3.37 (m, 3H), 3.03 (t,  $J$  = 7.1 Hz, 2H), 2.37 (s, 3H), 2.29 (m,  $J$  = 7.0, 2.2 Hz, 2H).

**$^{13}\text{C}$  NMR (101 MHz,  $\text{CDCl}_3$ ):**  $\delta$  197.4, 172.2, 166.3 (C-F,  $J_{\text{C-F}}$  = 253.4), 152.7, 143.4, 136.7, 134.5, 132.8 (C-F,  $J_{\text{C-F}}$  = 4.1), 130.6 (C-F,  $J_{\text{C-F}}$  = 8.3), 129.6, 126.9, 126.3 (C-F,  $J_{\text{C-F}}$  = 19.8), 125.2, 122.8, 121.6, 115.6 (C-F,  $J_{\text{C-F}}$  = 20.6), 45.9, 42.9, 35.1, 26.9, 21.4.

**$^{19}\text{F}$  NMR (376 MHz,  $\text{CDCl}_3$ ):**  $\delta$  -104.85.

**HRMS (ESI-TOF) m/z:**  $[M+H]^+$  calcd for  $C_{25}H_{24}FN_2O_3S_2$  483.1207, found: 483.1209.

**N-(2-(benzo[d]thiazol-2-yl)-5-oxo-5-(4-chlorophenylpentyl))-4-methylbenzenesulfonamide (3ad)**

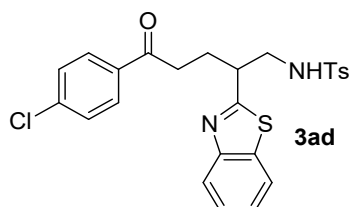

Following the general procedure, compound **3ad** was obtained as a yellow solid in 85% yield (42.4 mg); mp = 131 – 132 °C;  $R_f$  = 0.61 (PE/EA = 2/1).

**$^1H$  NMR (400 MHz,  $CDCl_3$ ):**  $\delta$  7.94 (d,  $J$  = 7.8 Hz, 1H), 7.89 – 7.80 (m, 3H), 7.74 – 7.67 (m, 2H), 7.49 (m,  $J$  = 8.3, 7.2, 1.3 Hz, 1H), 7.45 – 7.35 (m, 3H), 7.22 (d,  $J$  = 8.1 Hz, 2H), 5.57 (t,  $J$  = 6.0 Hz, 1H), 3.51 – 3.36 (m, 3H), 3.03 (t,  $J$  = 7.1 Hz, 2H), 2.37 (s, 3H), 2.29 (m,  $J$  = 7.0, 2.3 Hz, 2H).

**$^{13}C$  NMR (101 MHz,  $CDCl_3$ ):**  $\delta$  197.8, 172.2, 152.7, 143.4, 139.7, 136.7, 134.8, 134.5, 129.6, 129.4, 128.9, 126.9, 126.2, 125.2, 122.8, 121.6, 45.9, 42.9, 35.2, 26.9, 21.4.

$C_{25}H_{24}ClN_2O_3S_2$  499.0911, found: 499.0915.

**HRMS (ESI-TOF) m/z:**  $[M+H]^+$  calcd for  $C_{25}H_{24}ClN_2O_3S_2$  499.0911, found: 499.0915.

**N-(2-(benzo[d]thiazol-2-yl)-5-oxo-5-(4-trifluoromethylphenylpentyl))-4-methylbenzenesulfonamide (3ae)**

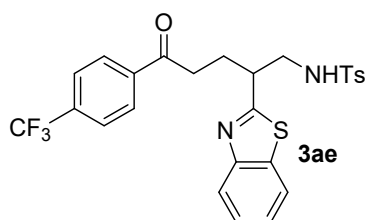

Following the general procedure, compound **3ae** was obtained as a gray solid in 90% yield (47.9 mg); mp = 156 – 157 °C;  $R_f$  = 0.54 (PE/EA = 2/1).

**$^1H$  NMR (400 MHz,  $CDCl_3$ ):**  $\delta$  8.00 (d,  $J$  = 8.1 Hz, 2H), 7.95 – 7.89 (m, 1H), 7.83 (dd,  $J$  = 8.1, 1.2 Hz, 1H), 7.74 – 7.66 (m, 4H), 7.47 (m,  $J$  = 8.3, 7.2, 1.3 Hz, 1H), 7.38 (td,  $J$  = 7.6, 1.2 Hz, 1H), 7.21 (d,  $J$  = 8.0 Hz, 2H), 5.67 (t,  $J$  = 6.1 Hz, 1H), 3.46 (m,  $J$  = 12.6, 6.3, 4.2 Hz, 3H), 3.08 (t,  $J$  = 7.1 Hz, 2H), 2.36 (s, 3H), 2.31 (q,  $J$  = 7.0 Hz, 2H).

$^{13}\text{C}$  NMR (101 MHz,  $\text{CDCl}_3$ ):  $\delta$  198.1, 172.1, 152.7, 143.4, 139.1, 136.8, 134.9 (C-F,  $J_{\text{C-F}}=32.9$ ), 134.5, 129.7, 128.4, 126.9, 126.2, 125.7 (C-F,  $J_{\text{C-F}}=3.3$ ), 122.9, 121.6, 45.9, 42.9, 35.6, 26.9, 21.5.

$^{19}\text{F}$  NMR (376 MHz,  $\text{CDCl}_3$ ):  $\delta$  -63.14.

HRMS (ESI-TOF)  $m/z$ :  $[\text{M}+\text{H}]^+$  calcd for  $\text{C}_{26}\text{H}_{24}\text{F}_3\text{N}_2\text{O}_3\text{S}_2$  533.1175, found: 533.1179.

#### N-(2-(benzo[*d*]thiazol-2-yl)-5-oxo-5-Biphenyl)-4-methylbenzenesulfonamide (3af)

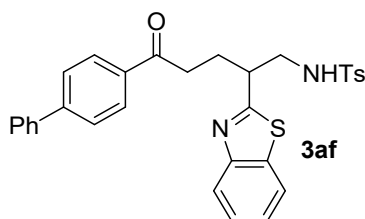

Following the general procedure, compound **3af** was obtained as a white solid in 84% yield (45.4 mg); mp = 131 – 132 °C;  $R_f$  = 0.51 (PE/EA = 1/1).

$^1\text{H}$  NMR (600 MHz,  $\text{CDCl}_3$ ):  $\delta$  7.99 – 7.94 (m, 2H), 7.95 – 7.91 (m, 1H), 7.82 (dd,  $J$  = 8.0, 1.2 Hz, 1H), 7.73 – 7.69 (m, 2H), 7.66 – 7.63 (m, 2H), 7.60 (dd,  $J$  = 8.2, 1.4 Hz, 2H), 7.49 – 7.44 (m, 3H), 7.41 – 7.36 (m, 2H), 7.20 (d,  $J$  = 8.0 Hz, 2H), 5.71 (q,  $J$  = 6.0, 5.5 Hz, 1H), 3.51 – 3.39 (m, 3H), 3.07 (t,  $J$  = 6.9 Hz, 2H), 2.35 (s, 3H), 2.30 (m,  $J$  = 12.1, 7.0 Hz, 2H).

$^{13}\text{C}$  NMR (151 MHz,  $\text{CDCl}_3$ ):  $\delta$  198.6, 172.3, 152.7, 145.8, 143.3, 139.7, 136.7, 135.1, 134.5, 129.6, 128.9, 128.6, 128.2, 127.2, 126.9, 126.1, 125.1, 122.8, 121.6, 77.2, 77.0, 76.7, 45.9, 43.0, 35.2, 27.0, 21.4.

HRMS (ESI-TOF)  $m/z$ :  $[\text{M}+\text{H}]^+$  calcd for  $\text{C}_{31}\text{H}_{29}\text{N}_2\text{O}_3\text{S}_2$  541.1614, found: 541.1614.

#### N-(2-(benzo[*d*]thiazol-2-yl)-5-oxo-5-(3-methylphenylpentyl))-4-methylbenzenesulfonamide (3ag)

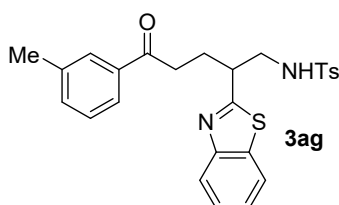

Following the general procedure, compound **3ag** was obtained as a yellow oil in 93% yield (44.5 mg);  $R_f$  = 0.53 (PE/EA = 2/1).

**<sup>1</sup>H NMR (600 MHz, CDCl<sub>3</sub>):** δ 7.96 – 7.90 (m, 1H), 7.84 – 7.80 (m, 1H), 7.72 – 7.66 (m, 4H), 7.47 (m, *J* = 8.3, 7.2, 1.3 Hz, 1H), 7.40 – 7.34 (m, 2H), 7.31 (t, *J* = 7.6 Hz, 1H), 7.19 (d, *J* = 8.0 Hz, 2H), 5.69 (t, *J* = 6.0 Hz, 1H), 3.48 – 3.37 (m, 3H), 3.02 (t, *J* = 7.1 Hz, 2H), 2.38 (s, 3H), 2.35 (s, 3H), 2.26 (m, *J* = 16.1, 9.3, 8.1 Hz, 2H).

**<sup>13</sup>C NMR (151 MHz, CDCl<sub>3</sub>):** δ 199.2, 172.3, 152.7, 143.3, 138.3, 136.7, 136.5, 134.0, 133.9, 129.7, 129.5, 128.5, 127.0, 126.9, 126.8, 125.2, 122.8, 121.6, 77.2, 77.0, 76.8, 45.9, 43.0, 35.2, 27.0, 21.4, 21.2.

**HRMS (ESI–TOF) m/z:** [M+H]<sup>+</sup> calcd for C<sub>26</sub>H<sub>27</sub>N<sub>2</sub>O<sub>3</sub>S<sub>2</sub> 479.1458, found: 479.1459.

**N-(2-(benzo[*d*]thiazol-2-yl)-5-oxo-5-(3-methoxyphenyl)pentyl)-4-methylbenzenesulfonamide (3ah)**

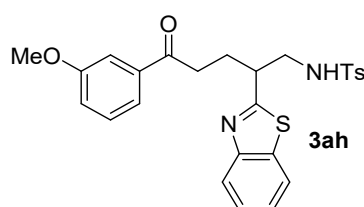

Following the general procedure, compound **3ah** was obtained as a yellow oil in 94% yield (46.4 mg); *R*<sub>f</sub> = 0.45 (PE/EA = 2/1).

**<sup>1</sup>H NMR (600 MHz, CDCl<sub>3</sub>):** δ 7.93 (dt, *J* = 8.2, 1.0 Hz, 1H), 7.83 (dt, *J* = 7.9, 1.0 Hz, 1H), 7.72 – 7.67 (m, 2H), 7.50 – 7.44 (m, 2H), 7.43 (dd, *J* = 2.7, 1.6 Hz, 1H), 7.38 (m, *J* = 8.2, 7.2, 1.2 Hz, 1H), 7.34 (t, *J* = 7.9 Hz, 1H), 7.24 – 7.18 (m, 2H), 7.09 (m, *J* = 8.2, 2.7, 1.0 Hz, 1H), 5.64 (t, *J* = 5.9 Hz, 1H), 3.83 (s, 3H), 3.48 – 3.38 (m, 3H), 3.06 – 2.99 (m, 2H), 2.36 (s, 3H), 2.28 (m, *J* = 6.9 Hz, 2H).

**<sup>13</sup>C NMR (151 MHz, CDCl<sub>3</sub>):** δ 198.8, 172.3, 159.8, 152.7, 143.3, 137.8, 136.7, 134.5, 129.7, 129.6, 126.9, 126.2, 125.2, 122.8, 121.6, 120.6, 119.7, 112.2, 55.4, 45.9, 42.9, 35.3, 27.0, 21.4.

**HRMS (ESI–TOF) m/z:** [M+H]<sup>+</sup> calcd for C<sub>26</sub>H<sub>27</sub>N<sub>2</sub>O<sub>4</sub>S<sub>2</sub> 495.1407, found: 495.1411.

**N-(2-(benzo[*d*]thiazol-2-yl)-5-oxo-5-(3-bromophenyl)pentyl)-4-methylbenzenesulfonamide (3ai)**

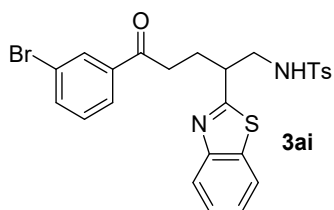

Following the general procedure, compound **3ai** was obtained as a yellow oil in 78% yield (42.3 mg);  $R_f = 0.42$  (PE/EA = 1/1).

**$^1\text{H NMR}$  (400 MHz,  $\text{CDCl}_3$ ):**  $\delta$  8.00 (t,  $J = 1.9$  Hz, 1H), 7.93 (d,  $J = 8.1$  Hz, 1H), 7.82 (td,  $J = 7.2, 6.5, 1.2$  Hz, 2H), 7.72 – 7.68 (m, 2H), 7.66 (dt,  $J = 8.1, 1.2$  Hz, 1H), 7.50 – 7.44 (m, 1H), 7.40 – 7.35 (m, 1H), 7.31 (t,  $J = 7.8$  Hz, 1H), 7.21 (d,  $J = 8.0$  Hz, 2H), 5.66 (t,  $J = 6.0$  Hz, 1H), 3.51 – 3.36 (m, 3H), 3.00 (t,  $J = 7.1$  Hz, 2H), 2.36 (s, 3H), 2.28 (q,  $J = 6.9$  Hz, 2H)

**$^{13}\text{C NMR}$  (101 MHz,  $\text{CDCl}_3$ ):**  $\delta$  197.6, 172.1, 152.7, 143.4, 138.2, 136.7, 136.1, 134.5, 131.0, 130.2, 129.7, 126.9, 126.6, 126.2, 125.3, 122.9, 122.8, 121.6, 45.9, 42.9, 35.3, 26.8, 21.5.

**HRMS (ESI-TOF)  $m/z$ :**  $[\text{M}+\text{H}]^+$  calcd for  $\text{C}_{25}\text{H}_{24}\text{BrN}_2\text{O}_3\text{S}_2$  543.0406, found: 543.0409.

**N-(2-(benzo[*d*]thiazol-2-yl)-5-oxo-5-(3-fluorophenyl)pentyl)-4-methylbenzenesulfonamide (3aj)**

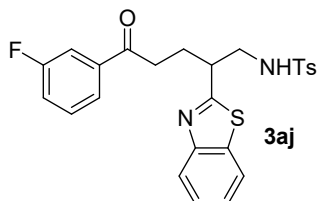

Following the general procedure, compound **3aj** was obtained as a yellow solid in 87% yield (42.0 mg); mp = 92 – 93 °C;  $R_f = 0.49$  (PE/EA = 1/1).

**$^1\text{H NMR}$  (400 MHz,  $\text{CDCl}_3$ ):**  $\delta$  7.93 (d,  $J = 8.1$  Hz, 1H), 7.83 (d,  $J = 8.0$  Hz, 1H), 7.69 (dd,  $J = 10.9, 8.1$  Hz, 3H), 7.57 (dt,  $J = 9.5, 2.1$  Hz, 1H), 7.55 – 7.44 (m, 1H), 7.39 (m,  $J = 7.9, 1.9$  Hz, 2H), 7.25 (d,  $J = 2.6$  Hz, 1H), 7.21 (d,  $J = 8.2$  Hz, 2H), 5.63 (t,  $J = 6.0$  Hz, 1H), 4.20 – 3.34 (m, 3H), 3.42 – 2.76 (m, 2H), 2.36 (s, 3H), 2.28 (m,  $J = 7.0, 2.0$  Hz, 2H).

**$^{13}\text{C NMR}$  (101 MHz,  $\text{CDCl}_3$ ):**  $\delta$  197.7, 172.1, 162.8 (C-F, 1  $J_{\text{C-F}} = 248.0$  Hz), 152.7, 143.4, 138.5 (C-F, 3  $J_{\text{C-F}} = 6.1$  Hz), 136.7, 134.5, 130.3 (C-F, 3  $J_{\text{C-F}} = 7.6$  Hz), 129.6,

126.9, 126.2, 125.2, 123.8 (C-F, 4  $J_{C-F}$  = 3.1 Hz), 122.8, 121.6, 120.2 (C-F, 2  $J_{C-F}$  = 21.6 Hz), 114.7 (C-F, 2  $J_{C-F}$  = 22.3 Hz), 45.9, 42.9, 35.4, 26.8, 21.4.

$^{19}\text{F}$  NMR (565 MHz,  $\text{CDCl}_3$ ):  $\delta$  -111.67, -111.68, -111.69, -111.70.

HRMS (ESI-TOF)  $m/z$ :  $[\text{M}+\text{H}]^+$  calcd for  $\text{C}_{25}\text{H}_{24}\text{FN}_2\text{O}_3\text{S}_2$  483.1207, found: 483.1209.

**N-(2-(benzo[*d*]thiazol-2-yl)-5-oxo-5-(3,4-bimethoxyphenyl)pentyl)-4-methylbenzenesulfonamide (3ak)**

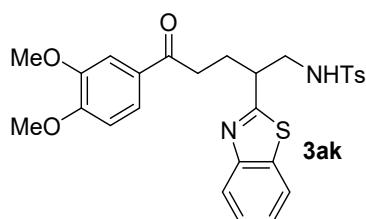

Following the general procedure, compound **3ak** was obtained as a yellow oil in 81% yield (42.5 mg);  $R_f$  = 0.41 (PE/EA = 1/1).

$^1\text{H}$  NMR (600 MHz,  $\text{CDCl}_3$ ):  $\delta$  7.92 (dd,  $J$  = 19.0, 8.3 Hz, 1H), 7.83 (d,  $J$  = 8.0 Hz, 1H), 7.70 (d,  $J$  = 8.2 Hz, 2H), 7.54 (dd,  $J$  = 8.4, 2.0 Hz, 1H), 7.50 – 7.44 (m, 2H), 7.41 – 7.37 (m, 1H), 7.21 (d,  $J$  = 7.9 Hz, 2H), 6.86 (d,  $J$  = 8.4 Hz, 1H), 5.67 (q,  $J$  = 6.1 Hz, 1H), 3.93 (s, 3H), 3.92 (s, 3H), 3.54 – 3.37 (m, 3H), 3.03 (t,  $J$  = 7.1 Hz, 2H), 2.37 (s, 3H), 2.35 – 2.22 (m,  $J$  = 7.0 Hz, 2H).

$^{13}\text{C}$  NMR (151 MHz,  $\text{CDCl}_3$ ):  $\delta$  197.7, 172.4, 153.4, 152.7, 149.0, 143.3, 136.8, 134.7, 134.6, 133.2, 129.8, 129.6, 126.9, 126.2, 125.2, 122.8, 121.6, 110.0, 56.1, 55.9, 45.8, 43.0, 34.7, 27.3, 21.4.

HRMS (ESI-TOF)  $m/z$ :  $[\text{M}+\text{H}]^+$  calcd for  $\text{C}_{27}\text{H}_{29}\text{N}_2\text{O}_5\text{S}_2$  525.1512, found: 525.1515.

**N-(2-(benzo[*d*]thiazol-2-yl)-5-oxo-5-(*o*-tolyl)pentyl)-4-methylbenzenesulfonamide**

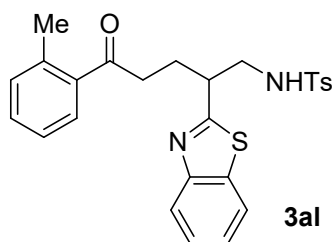

Following the general procedure, compound **3al** was obtained as a yellow oil in 31% yield (14.8 mg);  $R_f$  = 0.41 (PE/EA = 2/1).

**<sup>1</sup>H NMR (400 MHz, CDCl<sub>3</sub>):** δ 7.92 (dt, *J* = 8.2, 0.9 Hz, 1H), 7.87 – 7.75 (m, 2H), 7.69 (d, *J* = 8.3 Hz, 2H), 7.57 (dd, *J* = 8.1, 1.4 Hz, 1H), 7.47 (ddd, *J* = 8.3, 7.2, 1.3 Hz, 1H), 7.43 – 7.31 (m, 2H), 7.21 (dd, *J* = 9.5, 7.5 Hz, 4H), 5.68 (t, *J* = 6.2 Hz, 1H), 3.53 – 3.27 (m, 3H), 2.96 (t, *J* = 7.1 Hz, 2H), 2.46 (s, 3H), 2.36 (s, 3H).

**<sup>13</sup>C NMR (101 MHz, CDCl<sub>3</sub>):** δ 202.7, 172.2, 152.7, 143.3, 138.2, 137.2, 134.5, 131.9, 131.4, 129.6, 128.5, 126.9, 126.3, 126.1, 125.7, 125.1, 122.7, 121.5, 77.2, 77.0, 76.6, 46.0, 43.0, 37.9, 27.1, 21.4, 21.3.

**HRMS (ESI-TOF) m/z:** [M+H]<sup>+</sup> calcd for C<sub>26</sub>H<sub>27</sub>N<sub>2</sub>O<sub>3</sub>S<sub>2</sub> 479.1458, found: 479.1456.

**N-(2-(benzo[*d*]thiazol-2-yl)-5-oxo-5-Naphthyl)-4-methylbenzenesulfonamide (3am)**

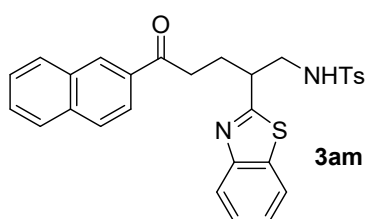

Following the general procedure, compound **3am** was obtained as a yellow oil in 67% yield (34.5 mg); *R*<sub>f</sub> = 0.51 (PE/EA = 1/1).

**<sup>1</sup>H NMR (400 MHz, CDCl<sub>3</sub>):** δ 8.42 (d, *J* = 1.7 Hz, 1H), 8.01 – 7.89 (m, 3H), 7.90 – 7.75 (m, 3H), 7.71 (d, *J* = 8.3 Hz, 2H), 7.60 (m, *J* = 8.2, 6.8, 1.4 Hz, 1H), 7.54 (m, *J* = 8.2, 6.9, 1.3 Hz, 1H), 7.48 (m, *J* = 8.3, 7.2, 1.3 Hz, 1H), 7.38 (td, *J* = 7.7, 1.2 Hz, 1H), 7.20 (d, *J* = 8.1 Hz, 2H), 5.66 (t, *J* = 5.9 Hz, 1H), 3.47 (pd, *J* = 7.1, 4.5 Hz, 3H), 3.19 (t, *J* = 7.1 Hz, 2H), 2.43 – 2.28 (m, 6H).

**<sup>13</sup>C NMR (101 MHz, CDCl<sub>3</sub>):** δ 199.0, 172.3, 152.7, 143.3, 136.8, 135.6, 134.6, 133.8, 132.4, 129.8, 129.6, 129.6, 128.5, 128.4, 127.7, 127.0, 126.8, 126.2, 125.2, 123.6, 122.8, 121.6, 45.8, 43.0, 35.3, 27.2, 21.4.

**HRMS (ESI-TOF) m/z:** [M+H]<sup>+</sup> calcd for C<sub>29</sub>H<sub>27</sub>N<sub>2</sub>O<sub>3</sub>S<sub>2</sub> 515.1458, found: 515.1460.

**N-(2-(benzo[*d*]thiazol-2-yl)-5-oxo-5-thienyl)-4-methylbenzenesulfonamide (3an)**

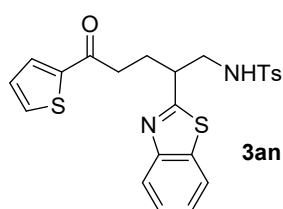



Following the general procedure, compound **3an** was obtained as a yellow oil in 61% yield (28.7 mg);  $R_f = 0.33$  (PE/EA = 2/1).

**$^1\text{H NMR}$  (600 MHz,  $\text{CDCl}_3$ ):**  $\delta$  7.94 (d,  $J = 8.2$  Hz, 1H), 7.83 (d,  $J = 8.0$  Hz, 1H), 7.70 (d,  $J = 8.0$  Hz, 2H), 7.68 (d,  $J = 3.8$  Hz, 1H), 7.63 (d,  $J = 5.1$  Hz, 1H), 7.48 (t,  $J = 7.7$  Hz, 1H), 7.39 (t,  $J = 7.6$  Hz, 1H), 7.22 (d,  $J = 8.0$  Hz, 2H), 7.11 (t,  $J = 4.3$  Hz, 1H), 5.65 – 5.58 (m, 1H), 3.51 – 3.38 (m, 3H), 3.00 (t,  $J = 7.1$  Hz, 2H), 2.37 (s, 3H), 2.28 (dh,  $J = 21.1, 7.0$  Hz, 2H).

**$^{13}\text{C NMR}$  (151 MHz,  $\text{CDCl}_3$ ):**  $\delta$  191.9, 172.2, 152.7, 143.8, 143.4, 136.8, 134.5, 133.8, 132.2, 129.6, 128.1, 126.9, 126.2, 125.2, 122.8, 121.6, 45.7, 42.8, 35.8, 27.2, 21.4.

**HRMS (ESI-TOF)  $m/z$ :**  $[\text{M}+\text{H}]^+$  calcd for  $\text{C}_{23}\text{H}_{23}\text{N}_2\text{O}_3\text{S}_3$  471.0865, found: 471.0868.

**N-(2-(benzo[*d*]thiazol-2-yl)-5-oxo-5-Cyclohexyl)-4-methylbenzenesulfonamide (3ao)**

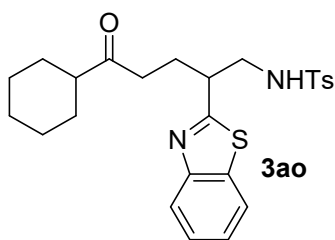

Following the general procedure, compound **3ao** was obtained as a yellow oil in 62% yield (29.2 mg);  $R_f = 0.48$  (PE/EA = 2/1).

**$^1\text{H NMR}$  (400 MHz,  $\text{CDCl}_3$ ):**  $\delta$  8.01 – 7.89 (m, 1H), 7.84 (dd,  $J = 8.0, 1.3$  Hz, 1H), 7.69 (d,  $J = 8.3$  Hz, 2H), 7.48 (m,  $J = 8.3, 7.2, 1.3$  Hz, 1H), 7.39 (td,  $J = 7.6, 7.2, 1.2$  Hz, 1H), 7.22 (d,  $J = 8.0$  Hz, 2H), 5.56 (t,  $J = 5.9$  Hz, 1H), 3.53 – 3.18 (m, 3H), 2.51 (t,  $J = 7.0$  Hz, 2H), 2.39 (s, 3H), 2.32 – 2.21 (m, 1H), 2.14 – 2.04 (m, 2H), 1.75 (tq,  $J = 6.2, 3.1$  Hz, 4H), 1.70 – 1.61 (m, 2H), 1.39 – 1.12 (m, 6H).

**$^{13}\text{C NMR}$  (101 MHz,  $\text{CDCl}_3$ ):**  $\delta$  213.0, 172.3, 152.7, 143.3, 136.8, 134.5, 129.6, 126.9, 126.1, 125.1, 122.8, 121.6, 50.7, 45.8, 42.9, 37.1, 28.4, 26.4, 25.7, 25.5, 21.48.

**HRMS (ESI-TOF)  $m/z$ :**  $[\text{M}+\text{H}]^+$  calcd for  $\text{C}_{25}\text{H}_{31}\text{N}_2\text{O}_3\text{S}_2$  471.1771, found: 471.1772.

**N-(2-(5-bromobenzo[*d*]thiazol-2-yl)-5-oxo-5-phenylpentyl)-4-methylbenzenesulfonamide (3ap)**

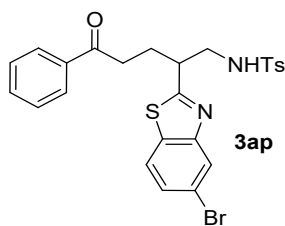

Following the general procedure, compound **3ap** was obtained as a white solid as in 70% yield (38.1 mg); mp = 154 – 155 °C;  $R_f$  = 0.42 (PE/EA = 2/1).

**$^1\text{H NMR}$  (400 MHz,  $\text{CDCl}_3$ ):**  $\delta$  8.04 (d,  $J$  = 1.8 Hz, 1H), 7.92 – 7.86 (m, 2H), 7.69 (t,  $J$  = 8.2 Hz, 3H), 7.56 (t,  $J$  = 7.4 Hz, 1H), 7.51 – 7.40 (m, 3H), 7.28 – 7.18 (m, 2H), 5.60 (t,  $J$  = 6.2 Hz, 1H), 3.43 (m,  $J$  = 10.2, 6.8 Hz, 3H), 3.04 (td,  $J$  = 6.9, 1.5 Hz, 2H), 2.37 (s, 3H), 2.27 (q,  $J$  = 8.3, 7.1 Hz, 2H).

**$^{13}\text{C NMR}$  (151 MHz,  $\text{CDCl}_3$ ):**  $\delta$  197.9, 173.2, 152.9, 142.4, 135.8, 135.4, 132.4, 132.3, 128.6, 127.6, 127.3, 127.0, 125.9, 125.4, 121.6, 118.8, 44.7, 42.1, 34.1, 25.9, 20.4.

**HRMS (ESI-TOF)  $m/z$ :**  $[\text{M}+\text{H}]^+$  calcd for  $\text{C}_{25}\text{H}_{24}\text{BrN}_2\text{O}_3\text{S}_2$  543.0406, found: 543.0410.

**N-(2-(5-chlorobenzo[*d*]thiazol-2-yl)-5-oxo-5-phenylpentyl)-4-methylbenzenesulfonamide (3aq)**

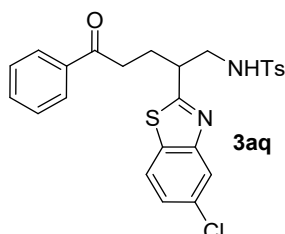

Following the general procedure, compound **3aq** was obtained as a yellow solid in 89% yield (44.4 mg); mp = 124 – 125 °C;  $R_f$  = 0.50 (PE/EA = 2/1).

**$^1\text{H NMR}$  (600 MHz,  $\text{CDCl}_3$ ):**  $\delta$  7.89 (dd,  $J$  = 8.3, 1.4 Hz, 2H), 7.87 (d,  $J$  = 2.0 Hz, 1H), 7.72 (d,  $J$  = 8.5 Hz, 1H), 7.69 (d,  $J$  = 8.3 Hz, 2H), 7.58 – 7.52 (m, 1H), 7.43 (t,  $J$  = 7.8 Hz, 2H), 7.34 (dd,  $J$  = 8.5, 2.0 Hz, 1H), 7.21 (d,  $J$  = 8.0 Hz, 2H), 5.65 (t,  $J$  = 6.2 Hz, 1H), 3.50 – 3.37 (m, 3H), 3.04 (td,  $J$  = 7.0, 2.5 Hz, 2H), 2.36 (s, 3H), 2.27 (m,  $J$  = 7.1, 2.4 Hz, 2H).

**$^{13}\text{C NMR}$  (151 MHz,  $\text{CDCl}_3$ ):**  $\delta$  198.9, 174.5, 153.6, 143.4, 136.8, 136.5, 133.3, 132.9, 132.2, 129.7, 128.6, 128.0, 127.0, 125.7, 122.7, 122.3, 45.9, 43.3, 35.1, 26.9, 21.5.

**HRMS (ESI-TOF)  $m/z$ :**  $[\text{M}+\text{H}]^+$  calcd for  $\text{C}_{25}\text{H}_{24}\text{ClN}_2\text{O}_3\text{S}_2$  499.0911, found: 499.0913.

**N-(2-(benzoxazole-2-yl)-5-oxo-5-phenylpentyl)-4-methylbenzenesulfonamide (3ar)**

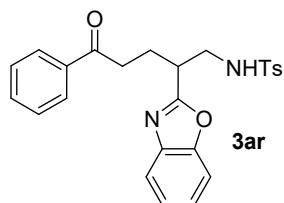

Following the general procedure, compound **3ar** was obtained as a yellow oil in 58% yield (26.1 mg);  $R_f = 0.31$  (PE/EA = 2/1).

**$^1\text{H}$  NMR (600 MHz,  $\text{CDCl}_3$ ):**  $\delta$  7.91 – 7.86 (m, 2H), 7.72 (d,  $J = 8.2$  Hz, 2H), 7.42 (m,  $J = 8.6, 6.0, 2.0$  Hz, 2H), 7.30 (m,  $J = 5.4, 2.9, 2.5$  Hz, 5H), 7.23 – 7.19 (m, 2H), 5.76 (dd,  $J = 28.9, 14.5$  Hz, 1H), 3.48 (dt,  $J = 13.9, 7.1$  Hz, 3H), 3.36 (m,  $J = 7.2, 5.0$  Hz, 2H), 3.05 (m,  $J = 8.8, 5.6, 1.9$  Hz, 3H), 2.36 (s, 1H), 2.23 (m,  $J = 14.0, 6.9$  Hz, 1H).

**$^{13}\text{C}$  NMR (151 MHz,  $\text{CDCl}_3$ ):**  $\delta$  198.8, 166.6, 150.4, 143.3, 140.5, 136.8, 136.4, 134.0, 133.2, 129.6, 128.5, 127.9, 126.9, 125.0, 124.4, 119.7, 110.5, 77.2, 77.0, 76.7, 44.3, 38.8, 35.1, 24.5, 21.4.

**HRMS (ESI-TOF)  $m/z$ :**  $[\text{M}+\text{H}]^+$  calcd for  $\text{C}_{25}\text{H}_{25}\text{N}_2\text{O}_4\text{S}$  449.1530, found: 449.1531.

**N-(2-(thiazol-2-yl)-5-oxo-5-phenylpentyl)-4-methylbenzenesulfonamide (3as)**

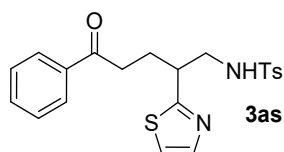

Following the general procedure, compound **3as** was obtained as a yellow oil in 70% yield (29.0 mg);  $R_f = 0.35$  (PE/EA = 1/1).

**$^1\text{H}$  NMR (400 MHz,  $\text{CDCl}_3$ ):**  $\delta$  7.94 – 7.87 (m, 2H), 7.75 – 7.70 (m, 2H), 7.68 (d,  $J = 3.3$  Hz, 1H), 7.59 – 7.53 (m, 1H), 7.48 – 7.42 (m, 2H), 7.29 – 7.25 (m, 2H), 7.24 (d,  $J = 3.3$  Hz, 1H), 5.71 – 5.64 (m, 1H), 3.43 – 3.28 (m, 3H), 3.00 (t,  $J = 7.1$  Hz, 2H), 2.39 (s, 3H), 2.21 (q,  $J = 6.9$  Hz, 2H).

**$^{13}\text{C}$  NMR (151 MHz,  $\text{CDCl}_3$ ):**  $\delta$  199.1, 171.4, 143.3, 142.3, 136.9, 136.5, 133.2, 129.7, 128.6, 128.0, 127.0, 118.7, 46.0, 41.8, 35.1, 27.2, 21.4.

**HRMS (ESI-TOF)  $m/z$ :**  $[\text{M}+\text{H}]^+$  calcd for  $\text{C}_{21}\text{H}_{23}\text{N}_2\text{O}_3\text{S}_2$  415.1145, found: 415.1147.

**N-(2-(oxazole-2-yl)-5-oxo-5-phenylpentyl)-4-methylbenzenesulfonamide (3at)**

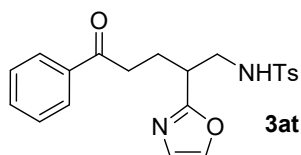

Following the general procedure, compound **3at** was obtained as a yellow solid in 79% yield (31.5 mg); mp = 114 – 115 °C;  $R_f$  = 0.54 (PE/EA = 1/1).

**$^1\text{H}$  NMR (600 MHz,  $\text{CDCl}_3$ ):**  $\delta$  7.91 (d,  $J$  = 8.0 Hz, 2H), 7.74 (d,  $J$  = 8.1 Hz, 2H), 7.60 – 7.53 (m, 2H), 7.45 (t,  $J$  = 7.6 Hz, 2H), 7.28 – 7.24 (m, 1H), 6.99 (d,  $J$  = 9.7 Hz, 1H), 5.62 (t,  $J$  = 6.5 Hz, 1H), 3.38 – 3.25 (m, 2H), 3.24 – 3.14 (m, 1H), 3.00 (t,  $J$  = 7.1 Hz, 2H), 2.39 (s, 3H), 2.16 (m,  $J$  = 34.9, 14.1, 7.1 Hz, 2H).

**$^{13}\text{C}$  NMR (151 MHz,  $\text{CDCl}_3$ ):**  $\delta$  198.9, 164.7, 143.4, 138.8, 136.9, 136.5, 133.2, 129.74, 128.6, 128.0, 127.0, 126.7, 44.4, 38.2, 35.1, 24.7, 21.4.

**HRMS (ESI-TOF)  $m/z$ :**  $[\text{M}+\text{H}]^+$  calcd for  $\text{C}_{21}\text{H}_{23}\text{N}_2\text{O}_4\text{S}$  399.1373, found: 399.1375.

#### N-(2-(pyridine-2-yl)-5-oxo-5-phenylpentyl)-4-methylbenzenesulfonamide (**3au**)

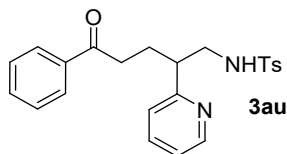

Following the general procedure, compound **3au** was obtained as a yellow oil in 74% yield (30.3 mg);  $R_f$  = 0.32 (PE/EA = 1/1).

**$^1\text{H}$  NMR (400 MHz,  $\text{CDCl}_3$ ):**  $\delta$  8.49 (dt,  $J$  = 4.7, 1.5 Hz, 1H), 7.91 – 7.84 (m, 2H), 7.70 (d,  $J$  = 8.3 Hz, 2H), 7.63 – 7.51 (m, 2H), 7.44 (dd,  $J$  = 8.4, 7.0 Hz, 2H), 7.25 (d,  $J$  = 8.1 Hz, 2H), 7.15 (m,  $J$  = 7.6, 4.9, 1.2 Hz, 1H), 7.10 (dd,  $J$  = 7.9, 1.1 Hz, 1H), 5.88 (t,  $J$  = 6.4 Hz, 1H), 3.37 (dt,  $J$  = 12.4, 7.1 Hz, 1H), 3.25 (m,  $J$  = 12.4, 5.2, 3.9 Hz, 1H), 3.05 (m,  $J$  = 7.2, 3.8 Hz, 1H), 2.89 (td,  $J$  = 7.1, 1.3 Hz, 2H), 2.38 (s, 3H), 2.12 (q,  $J$  = 7.3 Hz, 2H).

**$^{13}\text{C}$  NMR (151 MHz,  $\text{CDCl}_3$ ):**  $\delta$  199.6, 161.9, 149.2, 143.1, 136.9, 136.8, 136.6, 133.1, 129.6, 128.5, 128.0, 127.0, 123.5, 122.0, 45.7, 44.6, 35.4, 27.0, 21.4.

**HRMS (ESI-TOF)  $m/z$ :**  $[\text{M}+\text{H}]^+$  calcd for  $\text{C}_{23}\text{H}_{25}\text{N}_2\text{O}_3\text{S}$  409.1580, found: 409.1582.

#### N-(2-cyano-5-oxo-5-phenylpentyl)-4-methylbenzenesulfonamide (**3av**)

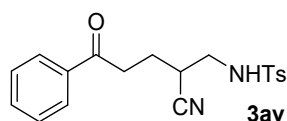

Following the general procedure, compound **3av** was obtained as a yellow oil in 38% yield (13.6 mg);  $R_f = 0.36$  (PE/EA = 2/1).

**$^1\text{H NMR}$  (600 MHz,  $\text{CDCl}_3$ ):**  $\delta$  7.90 (dd,  $J = 8.3, 1.4$  Hz, 2H), 7.73 (d,  $J = 8.3$  Hz, 1H), 7.65 (d,  $J = 8.0$  Hz, 1H), 7.58 – 7.48 (m, 1H), 7.42 (t,  $J = 7.8$  Hz, 1H), 7.23 (d,  $J = 8.1$  Hz, 1H), 7.13 (dd,  $J = 8.0, 1.7$  Hz, 1H), 7.07 (d,  $J = 1.7$  Hz, 1H), 5.13 (dd,  $J = 10.4, 5.1$  Hz, 2H), 3.87 (m,  $J = 14.8, 10.5, 4.1$  Hz, 1H), 3.36 (m,  $J = 15.1, 5.2, 3.8$  Hz, 1H), 3.28 – 2.96 (m, 2H), 2.78 (dd,  $J = 9.9, 4.5$  Hz, 1H), 2.30 (s, 3H), 2.26 – 2.12 (m, 1H), 2.05 (m,  $J = 14.7, 7.4, 5.2$  Hz, 1H).

**$^{13}\text{C NMR}$  (151 MHz,  $\text{CDCl}_3$ ):**  $\delta$  199.3, 142.7, 139.0, 136.3, 134.5, 133.6, 129.6, 128.7, 128.0, 126.4, 124.4, 44.5, 36.6, 35.3, 27.2, 21.5.

**HRMS (ESI-TOF)  $m/z$ :**  $[\text{M}+\text{H}]^+$  calcd for  $\text{C}_{19}\text{H}_{21}\text{N}_2\text{O}_3\text{S}$  357.1267, found: 357.1268.

**N-(2-(benzofuran-2-yl)-5-oxo-5-phenylpentyl)-4-methylbenzenesulfonamide (3aw)**

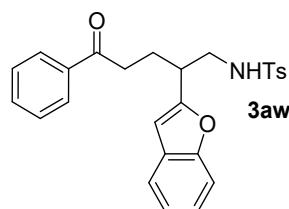

Following the general procedure, compound **3aw** was obtained as a yellow oil in 73% yield (32.7 mg);  $R_f = 0.32$  (PE/EA = 2/1).

**$^1\text{H NMR}$  (400 MHz,  $\text{CDCl}_3$ ):**  $\delta$  7.93 – 7.78 (m, 2H), 7.66 (d,  $J = 8.2$  Hz, 2H), 7.60 – 7.48 (m, 1H), 7.46 (dd,  $J = 7.2, 1.8$  Hz, 1H), 7.40 (t,  $J = 7.7$  Hz, 2H), 7.34 (dd,  $J = 8.8, 4.2$  Hz, 1H), 7.27 – 7.12 (m, 5H), 4.87 (q,  $J = 6.5, 4.9$  Hz, 1H), 3.39 – 3.18 (m, 2H), 3.11 (ddt,  $J = 13.0, 6.4, 3.8$  Hz, 1H), 2.90 (t,  $J = 7.5$  Hz, 2H), 2.36 (s, 3H), 2.25 – 1.97 (m, 3H).

**$^{13}\text{C NMR}$  (101 MHz,  $\text{CDCl}_3$ ):** 199.2, 157.1, 154.6, 143.3, 136.6, 136.5, 133.1, 129.6, 128.5, 127.9, 126.9, 126.2, 123.8, 122.7, 120.6, 110.9, 104.5, 45.8, 39.0, 35.4, 24.7, 21.4.

**HRMS (ESI-TOF)  $m/z$ :**  $[\text{M}+\text{H}]^+$  calcd for  $\text{C}_{26}\text{H}_{26}\text{NO}_4\text{S}$  448.1577, found: 448.1579.

**4-methyl-N-(5-oxo-5-phenyl-2-(thiophen-2-yl)pentyl)benzenesulfonamide (3ax)**

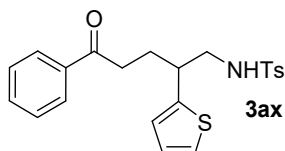

Following the general procedure, compound **3ax** was obtained as a yellow oil in 53% yield (21.9 mg);  $R_f = 0.32$  (PE/EA = 2/1).

**$^1\text{H NMR}$  (400 MHz,  $\text{CDCl}_3$ ):**  $\delta$  7.9 – 7.8 (m, 3H), 7.8 – 7.6 (m, 2H), 7.6 – 7.5 (m, 1H), 7.4 (t,  $J=7.7$  Hz, 2H), 7.3 (d,  $J=8.3$  Hz, 3H), 7.2 (dd,  $J=5.1, 1.1$  Hz, 1H), 6.9 (dd,  $J=5.1, 3.4$  Hz, 1H), 6.8 (dd,  $J=3.5, 1.2$  Hz, 1H), 4.6 (dd,  $J=8.1, 4.7$  Hz, 1H), 3.3 (ddd,  $J=12.3, 8.2, 5.5$  Hz, 1H), 3.2 (tt,  $J=9.9, 4.2$  Hz, 1H), 3.0 (ddd,  $J=12.7, 8.3, 4.7$  Hz, 1H), 2.9 (dd,  $J=8.0, 6.5$  Hz, 2H), 2.4 (s, 3H), 2.2 (dtd,  $J=14.9, 7.6, 4.6$  Hz, 1H), 1.9 (ddt,  $J=13.8, 9.9, 6.9$  Hz, 1H)  
 **$^{13}\text{C NMR}$  (101 MHz,  $\text{CDCl}_3$ ):**  $\delta$  199.3, 144.3, 143.5, 136.7, 133.1, 129.7, 129.7, 128.5, 127.93, 127.1, 127.0, 126.4, 125.6, 124.5, 49.1, 40.6, 35.6, 28.5, 21.5.

**HRMS (ESI-TOF) m/z:**  $[\text{M}+\text{H}]^+$  calcd for  $\text{C}_{22}\text{H}_{24}\text{NO}_3\text{S}_2$  414.1192, found: 414.1195.

**N-(2-(benzo[d]thiazol-2-yl)-5-oxo-5-phenylpentyl)-4-methoxybenzenesulfonamide (3ba)**

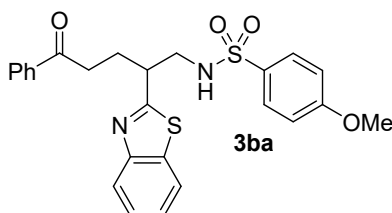

Following the general procedure, compound **3ba** was obtained as a white solid in 88% yield (42.3 mg); mp = 127 – 128 °C;  $R_f = 0.47$  (PE/EA = 1/1).

**$^1\text{H NMR}$  (600 MHz,  $\text{CDCl}_3$ ):**  $\delta$  7.92 (d,  $J = 8.2$  Hz, 1H), 7.89 – 7.86 (m, 2H), 7.82 (d,  $J = 8.0$  Hz, 1H), 7.74 (d,  $J = 8.3$  Hz, 2H), 7.54 (td,  $J = 7.5, 1.2$  Hz, 1H), 7.48 – 7.45 (m, 1H), 7.42 (t,  $J = 7.6$  Hz, 2H), 7.39 – 7.35 (m, 1H), 6.88 – 6.85 (m, 2H), 5.66 (t,  $J = 4.4$  Hz, 1H), 3.80 (d,  $J = 1.0$  Hz, 3H), 3.43 (m,  $J = 22.1, 15.7, 12.1, 5.9$  Hz, 3H), 3.05 – 3.01 (m, 2H), 2.28 (m,  $J = 7.1, 2.8$  Hz, 2H).

**$^{13}\text{C NMR}$  (151 MHz,  $\text{CDCl}_3$ ):**  $\delta$  198.9, 172.3, 162.7, 152.7, 136.4, 134.5, 133.2, 131.3, 129.0, 128.5, 127.9, 126.1, 125.1, 122.8, 121.6, 114.1, 55.4, 45.9, 43.0, 35.2, 26.9.

**HRMS (ESI-TOF) m/z:**  $[\text{M}+\text{H}]^+$  calcd for  $\text{C}_{25}\text{H}_{25}\text{N}_2\text{O}_4\text{S}_2$  481.1250, found: 481.1255.

**N-(2-(benzo[d]thiazol-2-yl)-5-oxo-5-phenylpentyl)-4-fluorobenzenesulfonamide (3ca)**

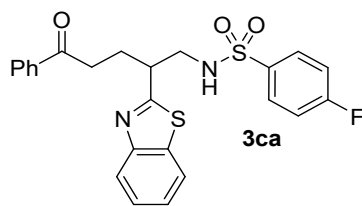

Following the general procedure, compound **3ca** was obtained as a white solid in 85% yield (39.8 mg); mp = 113 – 114 °C;  $R_f$  = 0.52 (PE/EA = 2/1).

**$^1\text{H}$  NMR (400 MHz,  $\text{CDCl}_3$ ):**  $\delta$  7.94 – 7.86 (m, 3H), 7.85 – 7.77 (m, 3H), 7.54 (t,  $J$  = 7.4 Hz, 1H), 7.50 – 7.34 (m, 4H), 7.05 (t,  $J$  = 8.5 Hz, 2H), 5.86 (s, 1H), 3.46 (m,  $J$  = 8.0, 3.0 Hz, 1H), 3.05 (t,  $J$  = 7.1 Hz, 2H), 2.28 (q,  $J$  = 6.9 Hz, 2H).

**$^{13}\text{C}$  NMR (101 MHz,  $\text{CDCl}_3$ ):**  $\delta$  198.9, 172.1, 164.8 (C-F,  $1J_{\text{C-F}}$  = 254.5 Hz), 152.6, 136.4, 135.8 (C-F,  $4J_{\text{C-F}}$  = 3.3 Hz), 134.4, 133.2, 129.6 (C-F,  $3J_{\text{C-F}}$  = 9.4 Hz), 128.5, 127.9, 126.2, 125.2, 122.7, 121.6, 116.1 (C-F,  $2J_{\text{C-F}}$  = 22.6 Hz), 46.0, 43.0, 35.1, 26.9.

**$^{19}\text{F}$  NMR (376 MHz,  $\text{CDCl}_3$ ):**  $\delta$  -105.33

**HRMS (ESI-TOF) m/z:**  $[\text{M}+\text{H}]^+$  calcd for  $\text{C}_{24}\text{H}_{22}\text{FN}_2\text{O}_3\text{S}_2$  469.1050, found: 469.1052.

**N-(2-(benzo[*d*]thiazol-2-yl)-5-oxo-5-phenylpentyl)-4-chlorobenzenesulfonamide (3da)**

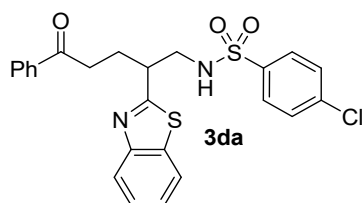

Following the general procedure, compound **3da** was obtained as a yellow solid in 85% yield (41.3 mg); mp = 114 – 115 °C;  $R_f$  = 0.57 (PE/EA = 2/1).

**$^1\text{H}$  NMR (400 MHz,  $\text{CDCl}_3$ ):**  $\delta$  7.91 (d,  $J$  = 8.2 Hz, 1H), 7.89 – 7.87 (m, 2H), 7.83 – 7.80 (m, 1H), 7.72 (d,  $J$  = 8.6 Hz, 2H), 7.58 – 7.52 (m, 1H), 7.47 (m,  $J$  = 8.3, 7.2, 1.3 Hz, 1H), 7.43 (t,  $J$  = 7.7 Hz, 2H), 7.38 (td,  $J$  = 7.6, 7.1, 1.2 Hz, 1H), 7.34 (d,  $J$  = 8.6 Hz, 2H), 5.86 (t,  $J$  = 5.9 Hz, 1H), 3.51 – 3.40 (m, 3H), 3.10 – 2.96 (m, 2H), 2.28 (m,  $J$  = 7.0, 3.9 Hz, 2H).

**$^{13}\text{C}$  NMR (151 MHz,  $\text{CDCl}_3$ ):**  $\delta$  198.9, 172.1, 152.6, 138.9, 138.3, 136.4, 134.5, 133.3, 129.2, 128.6, 128.3, 127.9, 126.2, 125.2, 122.7, 121.6, 46.1, 43.0, 35.1, 26.9.

**HRMS (ESI-TOF) m/z:**  $[\text{M}+\text{H}]^+$  calcd for  $\text{C}_{24}\text{H}_{22}\text{ClN}_2\text{O}_3\text{S}_2$  485.0755, found: 485.0757.

**N-(2-(benzo[d]thiazol-2-yl)-5-oxo-5-phenylpentyl)-4-bromobenzenesulfonamide (3ea)**

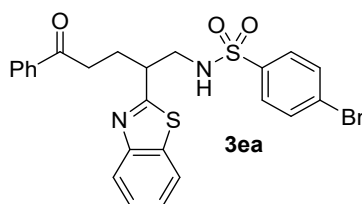

Following the general procedure, compound **3ea** was obtained as a white solid in 96% yield (51.0 mg); mp = 131 – 132 °C;  $R_f$  = 0.40 (PE/EA = 2/1).

**$^1\text{H}$  NMR (600 MHz,  $\text{CDCl}_3$ ):**  $\delta$  7.90 (d,  $J$  = 8.3 Hz, 1H), 7.88 (d,  $J$  = 7.1 Hz, 2H), 7.81 (d,  $J$  = 8.0 Hz, 1H), 7.64 (d,  $J$  = 8.6 Hz, 2H), 7.54 (t,  $J$  = 7.4 Hz, 1H), 7.49 (d,  $J$  = 8.5 Hz, 2H), 7.46 (td,  $J$  = 8.3, 1.1 Hz, 1H), 7.42 (t,  $J$  = 7.6 Hz, 2H), 7.40 – 7.35 (m, 1H), 5.90 (t,  $J$  = 5.9 Hz, 1H), 3.45 (m,  $J$  = 12.8, 11.2, 6.6 Hz, 3H), 3.04 (t,  $J$  = 7.0 Hz, 2H), 2.35 – 2.20 (m, 2H).

**$^{13}\text{C}$  NMR (151 MHz,  $\text{CDCl}_3$ ):**  $\delta$  198.9, 172.1, 152.6, 138.8, 136.4, 134.4, 133.2, 132.2, 128.5, 128.4, 127.9, 127.4, 126.2, 125.2, 122.7, 121.6, 46.1, 43.0, 35.1, 26.9.

**HRMS (ESI–TOF)  $m/z$ :**  $[\text{M}+\text{H}]^+$  calcd for  $\text{C}_{24}\text{H}_{22}\text{BrN}_2\text{O}_3\text{S}_2$  529.0250, found: 529.0254.

**N-(2-(benzo[d]thiazol-2-yl)-5-oxo-5-phenylpentyl)-1-naphthylsulfonamide (3fa)**

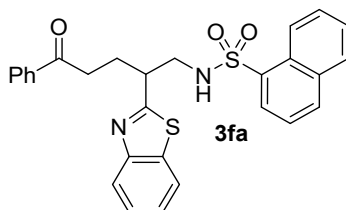

Following the general procedure, compound **3fa** was obtained as a white solid in 78% yield (39.1 mg); mp = 141 – 142 °C;  $R_f$  = 0.48 (PE/EA = 2/1).

**$^1\text{H}$  NMR (400 MHz,  $\text{CDCl}_3$ ):**  $\delta$  8.40 (d,  $J$  = 1.7 Hz, 1H), 7.95 – 7.70 (m, 8H), 7.67 – 7.49 (m, 4H), 7.48 – 7.29 (m, 4H), 5.92 (t,  $J$  = 6.0 Hz, 1H), 3.57 – 3.41 (m, 3H), 2.99 (t,  $J$  = 7.1 Hz, 2H), 2.26 (q,  $J$  = 6.8 Hz, 2H).

**$^{13}\text{C}$  NMR (101 MHz,  $\text{CDCl}_3$ ):**  $\delta$  198.9, 172.2, 152.6, 136.5, 136.4, 134.6, 134.4, 133.1, 132.0, 129.4, 129.1, 128.6, 128.5, 128.2, 127.9, 127.8, 127.4, 126.1, 125.1, 122.7, 122.1, 121.5, 46.0, 43.0, 35.1, 26.9.

**HRMS (ESI–TOF)  $m/z$ :**  $[\text{M}+\text{H}]^+$  calcd for  $\text{C}_{28}\text{H}_{25}\text{N}_2\text{O}_3\text{S}_2$  501.1301, found: 501.1304.



**N-(2-(benzo[*d*]thiazol-2-yl)-5-oxo-5-phenylpentyl)-2-thienylsulfonamide (3ga)**

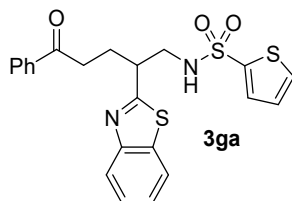

Following the general procedure, compound **3ga** was obtained as a yellow oil in 92% yield (42.0 mg);  $R_f = 0.32$  (PE/EA = 2/1).

**$^1\text{H NMR}$  (600 MHz,  $\text{CDCl}_3$ ):**  $\delta$  7.94 – 7.91 (m, 1H), 7.91 – 7.88 (m, 2H), 7.84 – 7.80 (m, 1H), 7.57 (dd,  $J = 3.7, 1.3$  Hz, 1H), 7.56 – 7.51 (m, 1H), 7.50 (dd,  $J = 5.0, 1.3$  Hz, 1H), 7.45 (m,  $J = 8.5, 7.3, 1.3$  Hz, 1H), 7.42 (t,  $J = 7.8$  Hz, 2H), 7.36 (m,  $J = 8.2, 7.2, 1.2$  Hz, 1H), 7.00 (dd,  $J = 5.0, 3.7$  Hz, 1H), 5.98 (t,  $J = 6.2$  Hz, 1H), 3.59 – 3.46 (m, 3H), 3.06 (t,  $J = 7.1$  Hz, 2H), 2.37 – 2.24 (m,  $J = 7.1$  Hz, 2H).

**$^{13}\text{C NMR}$  (151 MHz,  $\text{CDCl}_3$ ):**  $\delta$  198.9, 172.2, 152.6, 140.7, 136.4, 134.5, 133.2, 131.9, 131.7, 128.5, 127.9, 127.3, 126.1, 125.1, 122.8, 121.6, 46.1, 42.8, 35.1, 27.0.

**HRMS (ESI-TOF)  $m/z$ :**  $[M+H]^+$  calcd for  $\text{C}_{22}\text{H}_{21}\text{N}_2\text{O}_3\text{S}_3$  457.0709, found: 457.0711.

**N-(2-(benzo[*d*]thiazol-2-yl)-5-oxo-5-phenylpentyl)-trifluoroacetylbenzenesulfonamide (3ha)**

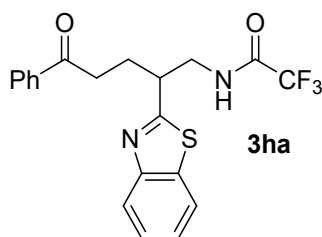

Following the general procedure, compound **3ha** was obtained as a yellow oil in 61% yield (24.8 mg);  $R_f = 0.46$  (PE/EA = 1/1).

**$^1\text{H NMR}$  (600 MHz,  $\text{CDCl}_3$ ):**  $\delta$  8.00 – 7.97 (m, 1H), 7.95 – 7.92 (m, 2H), 7.91 (s, 1H), 7.89 – 7.86 (m, 1H), 7.56 (m,  $J = 8.8, 7.0, 1.3$  Hz, 1H), 7.50 (m,  $J = 8.3, 7.2, 1.2$  Hz, 1H), 7.45 (t,  $J = 7.8$  Hz, 2H), 7.41 (m,  $J = 8.3, 7.2, 1.2$  Hz, 1H), 3.95 (dt,  $J = 13.4, 6.6$  Hz, 1H), 3.82 (dt,  $J = 13.7, 4.8$  Hz, 1H), 3.58 (m,  $J = 6.9, 4.4$  Hz, 1H), 3.15 (td,  $J = 6.9, 2.0$  Hz, 2H), 2.40 (m,  $J = 14.0, 7.0$  Hz, 1H), 2.24 (m,  $J = 14.0, 7.0$  Hz, 1H).

<sup>13</sup>C NMR (151 MHz, CDCl<sub>3</sub>): δ 198.9, 172.2, 157.4 (C-F, 2  $J_{C-F}$  = 37.1 Hz), 152.7, 136.4, 134.4, 133.3, 128.6, 128.0, 126.3, 125.4, 122.9, 121.7, 115.8 (C-F, 1  $J_{C-F}$  = 287.7 Hz), 42.1, 42.0, 35.2, 26.9.

<sup>19</sup>F NMR (376 MHz, CDCl<sub>3</sub>): δ -75.98.

HRMS (ESI-TOF) m/z: [M+H]<sup>+</sup> calcd for C<sub>20</sub>H<sub>18</sub>F<sub>3</sub>N<sub>2</sub>O<sub>2</sub>S 407.1036, found: 407.1040.

**N-(2-(benzo[d]thiazol-2-yl)-3-oxo-3-phenylpropyl)-4-methylbenzenesulfonamide (4aa)**

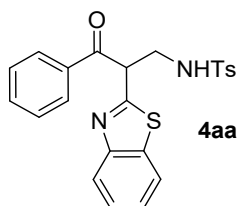

Following the general procedure, compound **4aa** was obtained as a yellow oil in 59% yield (25.8 mg); R<sub>f</sub> = 0.42 (PE/EA = 2/1).

<sup>1</sup>H NMR (600 MHz, CDCl<sub>3</sub>): δ 8.00 – 7.92 (m, 3H), 7.79 (d,  $J$  = 8.0 Hz, 2H), 7.68 (t,  $J$  = 9.8 Hz, 2H), 7.57 – 7.52 (m, 4H), 7.44 (dt,  $J$  = 15.2, 5.9 Hz, 2H), 7.35 (dd,  $J$  = 13.1, 5.5 Hz, 3H), 7.18 (t,  $J$  = 12.0 Hz, 1H), 5.38 (t,  $J$  = 6.7 Hz, 1H), 3.81 (dt,  $J$  = 13.8, 7.0 Hz, 1H), 3.69 (dd,  $J$  = 13.5, 6.7 Hz, 1H), 2.36 (s, 3H).

<sup>13</sup>C NMR (151 MHz, CDCl<sub>3</sub>): δ 195.3, 164.6, 155.3, 152.7, 144.7, 143.5, 136.8, 135.3, 135.1, 134.0, 129.7, 129.0, 128.8, 126.9, 126.2, 125.5, 123.3, 121.5, 77.2, 77.00, 76.79, 52.3, 44.8, 21.4.

HRMS (ESI-TOF) m/z: [M+H]<sup>+</sup> calcd for C<sub>23</sub>H<sub>21</sub>N<sub>2</sub>O<sub>3</sub>S<sub>2</sub> 437.0988, found: 437.0992.

**N-(2-(benzo[d]thiazol-2-yl)-6-oxo-6-phenylhexyl)-4-methylbenzenesulfonamide (4ac)**

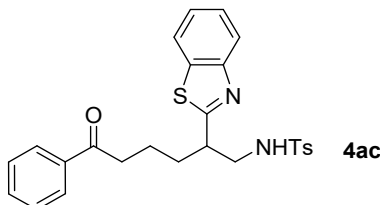

Following the general procedure, compound **4ac** was obtained as a colorless oil in 79% yield (37.8 mg); R<sub>f</sub> = 0.53 (PE/EA = 1/1).

**<sup>1</sup>H NMR (600 MHz, CDCl<sub>3</sub>):** δ 7.96 (t, *J* = 8.5 Hz, 1H), 7.89 (d, *J* = 7.9 Hz, 3H), 7.82 – 7.71 (m, 3H), 7.67 (d, *J* = 7.8 Hz, 4H), 7.52 (t, *J* = 7.3 Hz, 1H), 7.42 (dd, *J* = 16.7, 8.6 Hz, 4H), 7.34 (dd, *J* = 16.5, 8.5 Hz, 3H), 7.22 (d, *J* = 7.9 Hz, 1H), 7.16 (d, *J* = 7.9 Hz, 2H), 5.76 (s, 1H), 3.39 (t, *J* = 6.1 Hz, 3H), 3.36 – 3.22 (m, 1H), 2.93 (dd, *J* = 17.1, 7.5 Hz, 2H), 2.33 (s, 3H), 1.94 – 1.83 (m, 2H), 1.81 – 1.66 (m, 3H).

**<sup>13</sup>C NMR (151 MHz, CDCl<sub>3</sub>):** δ 199.6, 172.6, 152.6, 143.2, 136.7, 136.6, 134.4, 133.0, 129.5, 128.5, 127.9, 126.8, 126.2, 126.0, 125.0, 122.6, 121.5, 60.3, 46.2, 43.9, 37.8, 32.3, 21.3.

**HRMS (ESI-TOF) m/z:** [M+H]<sup>+</sup> calcd for C<sub>26</sub>H<sub>27</sub>N<sub>2</sub>O<sub>3</sub>S<sub>2</sub> 479.1458, found: 479.1460.

## 5. The Gram Scale Reaction

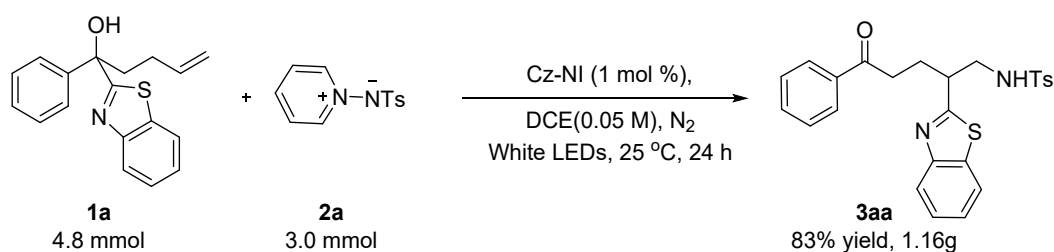

**General Procedure:** A dried 100 mL round bottom flask was charged with the photocatalyst (0.03 mmol, 12.6 mg), the heteroaryl-substituted tertiary bishomoallylic alcohol **1a** (4.8 mmol, 1.6 equiv), N-protected 1-aminopyridinium **2a** (3 mmol, 1 equiv) and 60 mL DCE. The reaction mixture was degassed by three cycles of freeze-pump-thaw. After the mixture was thoroughly degassed, the vial was placed beside a white LED light. The reaction was stirred at 25 °C for 24 h. After completion of the reaction as checked by TLC. The reaction mixture was purified by silica gel flash column chromatography (petroleum ether/EtOAc) to give the corresponding product.

## 6. Transformations of Product

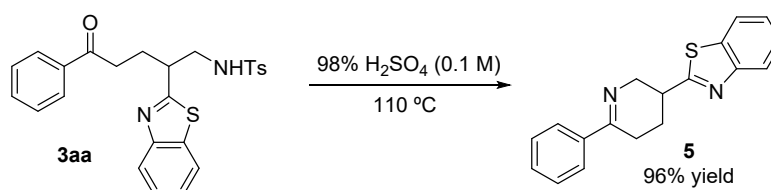

A solution of compound **3aa** (46.4 mg, 0.1 mmol) in H<sub>2</sub>SO<sub>4</sub> (1 mL) (98 wt%) was stirred at 110 °C (oil bath) for 1 hour to give a black-brown solution.<sup>4</sup> TLC showed the reaction was completed. The reaction solution was cooled to 0 – 10 °C with ice-water

(3 mL), neutralized to pH = 7 – 8 with Na<sub>2</sub>CO<sub>3</sub> (solid) and extracted with EtOAc (5 mL x 2). The combined extracts were collected, dried over anhydrous Na<sub>2</sub>SO<sub>4</sub>, and concentrated under reduced pressure to give compound **5** as a gray solid (96% yield, 28.2 mg).

### 3-(2-(benzo[d]thiazol-2-yl)-6-phenyl-2,3,4,5-tetrahydropyridine (**5**))

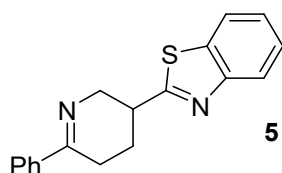

Compound **5** was obtained in 96% yield (28.1 mg) as a gray solid; mp= 115-116 °C; R<sub>f</sub> = 0.54 (PE/EA = 10/1).

**<sup>1</sup>H NMR (400 MHz, CDCl<sub>3</sub>):** δ 10.05 (s, 1H), 8.07 – 7.99 (m, 2H), 7.12 (d, *J* = 8.3 Hz, 2H), 6.99 (d, *J* = 8.8 Hz, 1H), 6.55 (s, 1H), 6.44 (d, *J* = 8.2 Hz, 2H), 3.96-3.87 (m, 2H) 3.62-3.56 (m, 2H), 3.08-3.01 (m, 1H) 2.05-2.04 (m, 2H), 1.94-1.83 (m, 2H), 1.30 (s, 9H).

**<sup>13</sup>C NMR (101 MHz, CDCl<sub>3</sub>):** δ 174.7, 161.5, 145.7, 140.3, 129.6, 129.4, 129.2, 126.3, 124.0, 115.4, 113.1, 64.6, 51.3, 49.8, 35.3, 31.2, 28.4, 24.0.

**HRMS (ESI-TOF) m/z:** [M+Na]<sup>+</sup> calcd for C<sub>18</sub>H<sub>16</sub>N<sub>2</sub>SNa 293.1107, found: 293.1111.

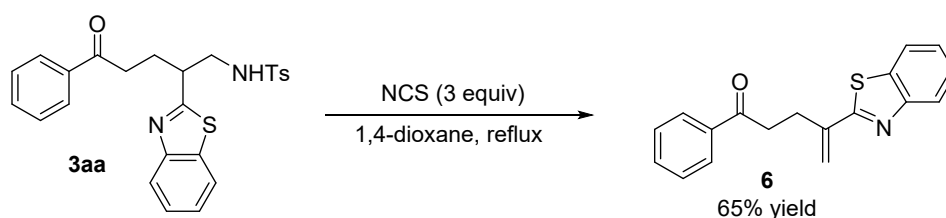

To a solution of **3aa** (46.4 mg, 0.1 mmol) in 1,4-dioxane (1 ml), NCS (0.3 mmol) was added, and the resulted mixture was sequentially stirred under reflux temperature until the complete conversion was detected by TLC analysis. Finally, the reaction was quenched with saturated sodium bicarbonate solution, extracted with EtOAc (3×5 mL), washed with saturated brine (3×5 mL), dried over anhydrous Na<sub>2</sub>SO<sub>4</sub> and concentrated in vacuo to give a residue. The residue was purified by silica gel with petroleum ether/EtOAc as the elute to afford product **3** (65% yield, 19.1 mg).

### 4-(benzo[d]thiazol-2-yl)-1-phenylpent-4-en-1-one (**6**)

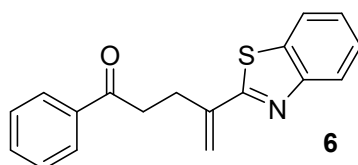

Compound **6** was obtained in 65% yield (19.1 mg) as a yellow oil;  $R_f = 0.59$  (PE/EA = 10/1).

$^1\text{H NMR}$  (400 MHz,  $\text{CDCl}_3$ ):  $\delta$  8.05 – 7.96 (m, 3H), 7.85 (d,  $J = 7.9$  Hz, 1H), 7.61 – 7.52 (m, 1H), 7.50 – 7.42 (m, 3H), 7.42 – 7.33 (m, 1H), 5.99 (s, 1H), 5.62 (s, 1H), 3.40 (t,  $J = 7.5$  Hz, 2H), 3.17 (t,  $J = 7.5$  Hz, 2H).

$^{13}\text{C NMR}$  (101 MHz,  $\text{CDCl}_3$ ):  $\delta$  199.3, 168.5, 153.7, 142.5, 136.8, 134.7, 133.0, 128.5, 128.1, 126.0, 125.5, 123.3, 121.4, 120.4, 77.3, 77.0, 76.6, 37.8, 28.9.

**HRMS (ESI-TOF) m/z:**  $[\text{M}+\text{H}]^+$  calcd for  $\text{C}_{25}\text{H}_{24}\text{ClN}_2\text{O}_3\text{S}_2$  294.0947, found: 294.0950.

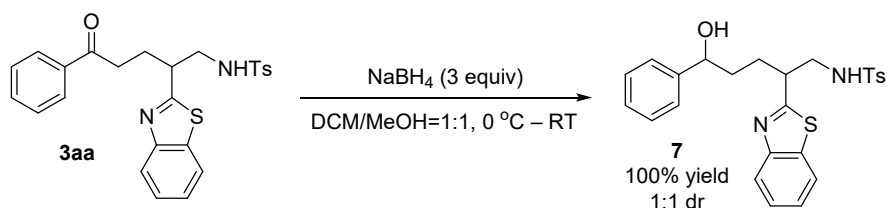

To a solution of **3aa** (46.4 mg, 0.1 mmol) in dichloromethane (0.5 ml) and methanol (0.5 ml) was added sodium borohydride (11.4 mg, 0.3 mmol) at 0 °C (ice water bath). The reaction mixture was then allowed to warm to room temperature. After stirring for 1.5 h, the reaction mixture was quenched with water. The resulting solution was extracted three times with dichloromethane. The combined organic phases were dried over sodium sulfate and filtered. The filtrate was concentrated in vacuo and the residue was purified by flash column chromatography (PE/EA = 1/1) to give **7** (46.6 mg, 100%) as a colorless liquid.

**N-(2-(benzo[*d*]thiazol-2-yl)-5-hydroxyl-5-phenylpentyl)-4-methylbenzenesulfonamide (**7**)**

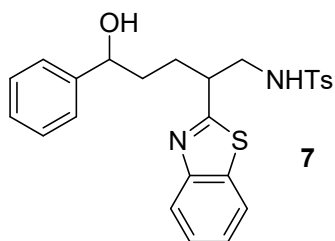

Compound **7** was obtained in 100% yield (46.6 mg) as a colorless oil (dr = 1:1);  $R_f$  = 0.61 (PE/EA = 1/1).

**$^1\text{H NMR}$  (600 MHz,  $\text{CDCl}_3$ ):**  $\delta$  7.90 (d,  $J$  = 8.5 Hz, 1H),  $\delta$  7.80 (d,  $J$  = 8.5 Hz, 1H),  $\delta$  7.66 (d,  $J$  = 8.2 Hz, 2H), 7.46 (t,  $J$  = 7.7 Hz, 1H), 7.40 (d,  $J$  = 7.6 Hz, 2H), 7.37 (t,  $J$  = 7.6 Hz, 1H), 7.33 – 7.29 (m, 2H), 7.28 (dd,  $J$  = 6.1, 3.5 Hz, 2H), 7.19 (d,  $J$  = 8.1 Hz, 2H), 5.65 – 5.46 (m, 1H), 4.64 (dt,  $J$  = 12.5, 5.6 Hz, 1H), 3.45 (t,  $J$  = 6.6 Hz, 3H), 3.33 (m,  $J$  = 16.5, 12.5, 6.2 Hz, 3H), 2.37 (s, 3H), 1.95 (d,  $J$  = 6.5 Hz, 3H).

**$^{13}\text{C NMR}$  (101 MHz,  $\text{CDCl}_3$ ):**  $\delta$  172.8, 172.7, 152.6, 144.1, 143.2, 136.8, 134.5, 129.61, 128.5, 127.6, 126.9, 126.1, 125.7, 125.1, 122.7, 121.5, 77.3, 77.0, 76.6, 73.9, 73.8, 46.2, 46.1, 43.9, 43.7, 36.0, 35.8, 29.3, 29.2, 21.4.

**HRMS (ESI-TOF)  $m/z$ :**  $[\text{M}+\text{H}]^+$  calcd for  $\text{C}_{25}\text{H}_{27}\text{N}_2\text{O}_3\text{S}_2$  467.1458, found: 467.1461.

## 7. Mechanistic Investigations

### 7.1 Luminescence Quenching Experiments

Stern-Volmer experiments were conducted on an Agilent Technologies Cary Eclipse Fluorescence Spectrophotometer using the Cary Eclipse Scan Application. Rigorously purged (with nitrogen) solutions of each component were prepared before each set of experiments. Luminescence quenching experiments were run with  $\text{CH}_3\text{CN}$  as the solvent. The solutions were irradiated at 420 nm and the luminescence was measured from 400 nm to 800 nm (emission maximum is at 550 nm). The concentration of Cz-NI stock solution was 0.3 mM in  $\text{CH}_3\text{CN}$ . After being stirred with a thin glass rod, the emission spectrum was collected. Linear regression of  $I_0/I$  against concentration is done in Origin.

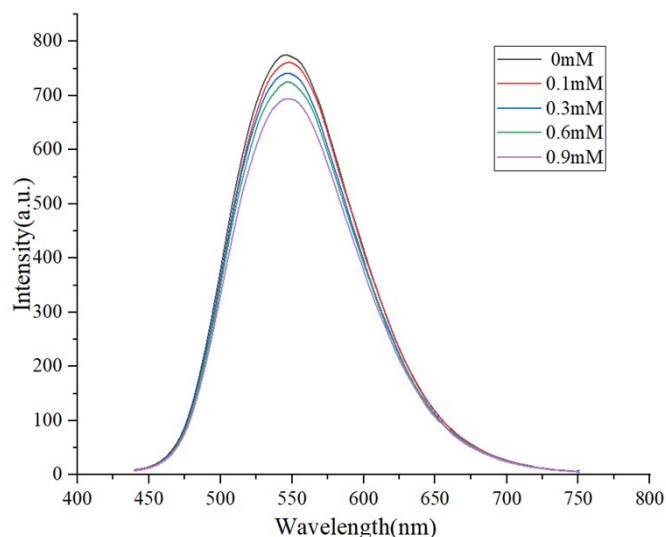

**Figure S2: Fluorescence quenching data with Cz-NI and variable N-Ts pyridinium**

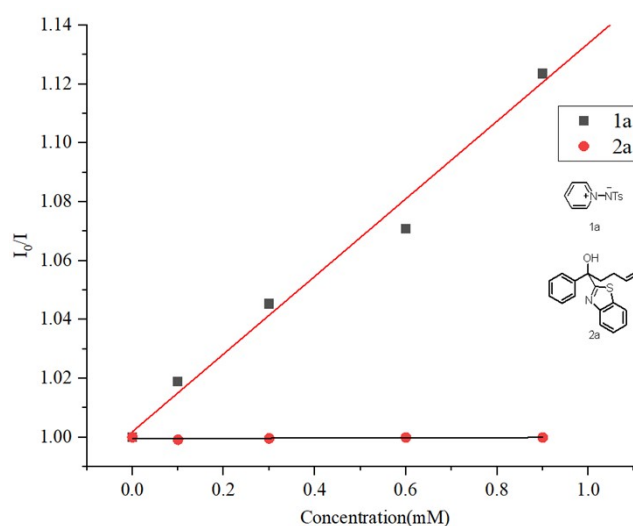

**Figure S3: Stern-Volmer plot of Cz-NI with variables 1a and 2a**

## 7.2 Capture of Radical Species

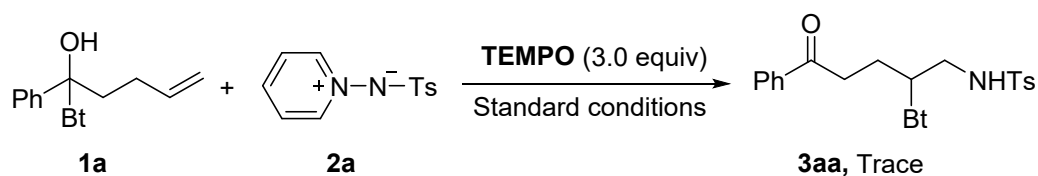

A dried 10 mL reaction tube was charged with the **Cz-NI** (0.001 mmol, 0.42 mg), the heteroaryl-substituted tertiary bishomoallylic alcohol **1a** (0.16 mmol, 1.6 equiv), N-protected 1-aminopyridinium **2a** (0.1 mmol, 1.0 equiv), TEMPO (3.0 equiv) and 2.0 mL DCE. The reaction mixture was degassed by three cycles of freeze-pump-thaw. After the mixture was thoroughly degassed, the vial was placed beside a white LED

light. The reaction was stirred at 25 °C for 9 h. We found that the product sites are close to disappearing, proving that the reaction is a free radical course.

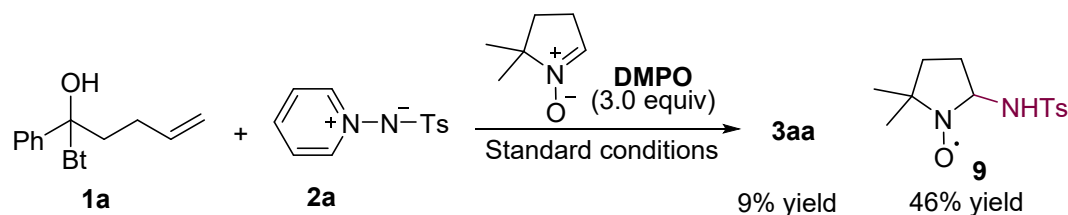

A dried 10 mL reaction tube was charged with the **Cz-NI** (0.001 mmol, 0.42 mg), the heteroaryl-substituted tertiary bishomoallylic alcohol **1a** (0.16 mmol, 1.6 equiv), N-protected 1-aminopyridinium **2a** (0.1 mmol, 1.0 equiv), DMPO (3.0 equiv) and 2.0 mL DCE. The reaction mixture was degassed by three cycles of freeze-pump-thaw. After the mixture was thoroughly degassed, the vial was placed beside a white LED light. The reaction was stirred at 25 °C for 9 h, the reaction mixture was measured by EPR, indicating there existed nitrogen radical species in the reaction mixture. Finally, the reaction mixture was concentrated and purified by flash chromatography (silica gel, mixtures of petroleum ether/ethyl acetate) to afford compound **9** (13.1 mg, 46% yield) as a purple-black oil, the yield of **3aa** is only 9% (4.1 mg).

Radical species **8**:

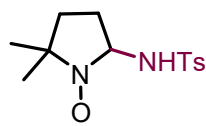

**HRMS (ESI-TOF) m/z:**  $[\text{M}]^+$  Calcd for 283.1111, found 283.1111

$g = 2.00541$ ,  $a(\text{N}) = 12.79$ ,  $a(\text{H}^\beta) = 4.19$ .

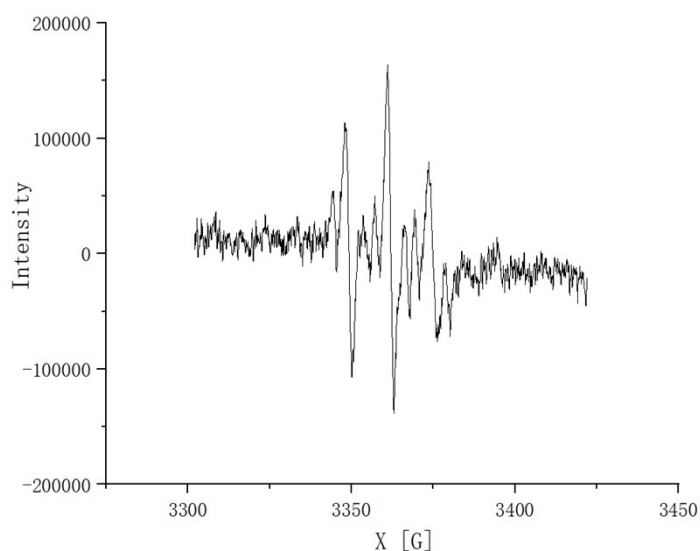



## 8. X-Ray Crystallographic Data of product 3ab

Single crystals of **3ab** were grown from slow evaporation of dichloromethane solution at room temperature. The data was collected on an XtaLAB Synergy R, HyPix diffractometer. The crystal was kept at 292 K during data collection. The data of the crystal structure **3ab** has been deposited at the Cambridge Crystallographic Data Centre and allocated the deposition number: CCDC 2121369.

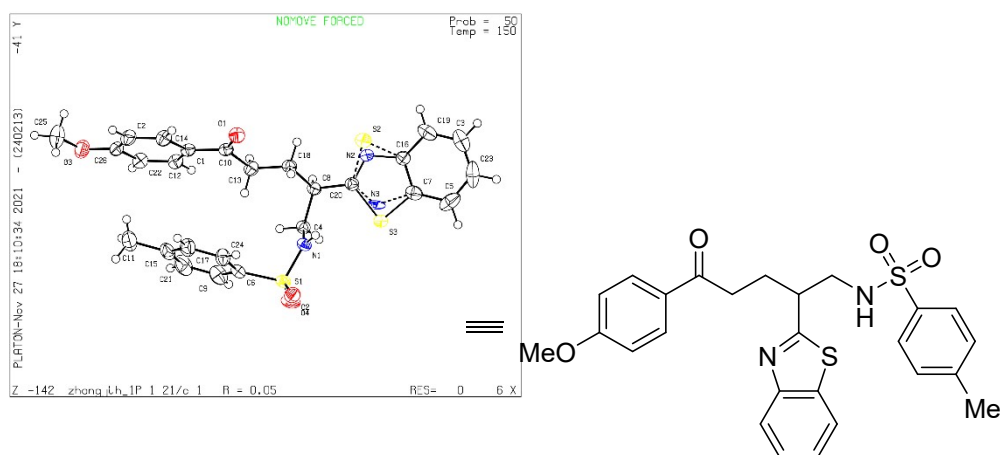

**Figure S4:** ORTEP diagram of **3ab**. The thermal ellipsoids are drawn at the 50% probability level

**Table S6: X-Ray Crystallographic Data of 3ab**

|                          |                                                                                    |                                                                                    |                          |
|--------------------------|------------------------------------------------------------------------------------|------------------------------------------------------------------------------------|--------------------------|
| Bond precision:          | C-C = 0.0024 Å                                                                     | Wavelength=1.54184                                                                 |                          |
| Cell:                    | a=9.8319(3)<br>alpha=90                                                            | b=11.5048(3)<br>beta=96.606(3)                                                     | c=21.1845(6)<br>gamma=90 |
| Temperature:             | 150 K                                                                              |                                                                                    |                          |
|                          | Calculated                                                                         | Reported                                                                           |                          |
| Volume                   | 2380.36(12)                                                                        | 2380.36(12)                                                                        |                          |
| Space group              | P 21/c                                                                             | P 1 21/c 1                                                                         |                          |
| Hall group               | -P 2ybc                                                                            | -P 2ybc                                                                            |                          |
| Moiety formula           | C <sub>26</sub> H <sub>26</sub> N <sub>1.95</sub> O <sub>4</sub> S <sub>2.05</sub> | C <sub>26</sub> H <sub>26</sub> N <sub>1.95</sub> O <sub>4</sub> S <sub>2.05</sub> |                          |
| Sum formula              | C <sub>26</sub> H <sub>26</sub> N <sub>1.95</sub> O <sub>4</sub> S <sub>2.05</sub> | C <sub>26</sub> H <sub>26</sub> N <sub>1.95</sub> O <sub>4</sub> S <sub>2.05</sub> |                          |
| Mr                       | 495.51                                                                             | 495.51                                                                             |                          |
| Dx, g cm <sup>-3</sup>   | 1.383                                                                              | 1.383                                                                              |                          |
| Z                        | 4                                                                                  | 4                                                                                  |                          |
| Mu (mm <sup>-1</sup> )   | 0.265                                                                              | 0.265                                                                              |                          |
| F000                     | 1041.8                                                                             | 1042.0                                                                             |                          |
| F000'                    | 1043.24                                                                            |                                                                                    |                          |
| h, k, lmax               | 14,16,30                                                                           | 13,16,29                                                                           |                          |
| Nref                     | 7349                                                                               | 6031                                                                               |                          |
| Tmin, Tmax               | 0.984,0.992                                                                        | 0.625,1.000                                                                        |                          |
| Tmin'                    | 0.982                                                                              |                                                                                    |                          |
| Tmax= 1.000              |                                                                                    |                                                                                    |                          |
| AbsCorr = MULTI-SCAN     |                                                                                    |                                                                                    |                          |
| Data completeness= 0.821 | Theta(max)= 30.648                                                                 |                                                                                    |                          |

## 9. Mechanistic Computational Analysis

All the DFT calculations at the M062X(D3)/6-31G(d)<sup>8-9</sup> level for neutral molecules or UM062X(D3)/6-31G(d) level for radical ions with the SMD<sup>10</sup> solvation model and DCM as the solvent were carried out to study the mechanism by Gaussian 09<sup>11</sup>. Frequency calculations were carried out at the same level of theory to confirm their character as minima (no imaginary frequencies) or transition states (a single imaginary frequency). And the intrinsic reaction coordinate (IRC) calculations have confirmed that all stationary points were smoothly connected. We have used GaussView<sup>12</sup> programs to generate ball and stick geometries of optimized structures. The electron spin density with the value of 0.02 is visualized by wave function analysis software Multiwfn-3.8<sup>13</sup> program and visualization software VMD<sup>14</sup> to generate the scheme of the electron spin density.

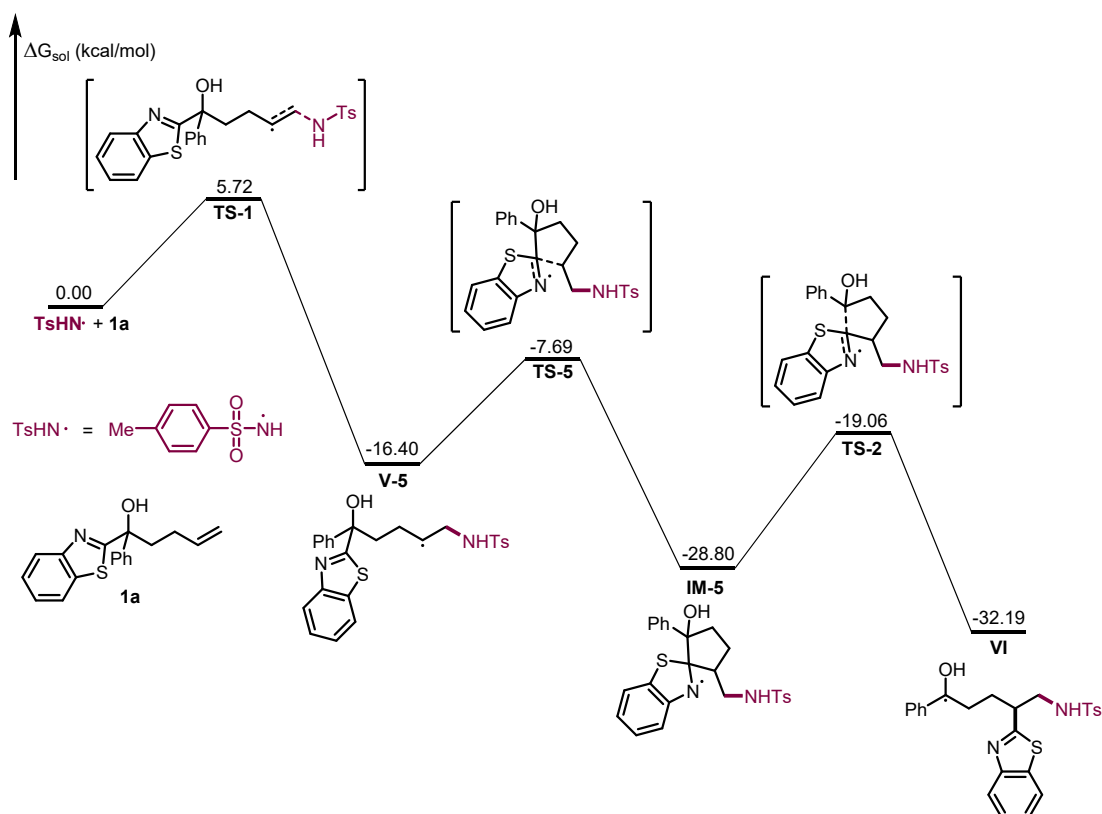

**Figure S5.** a) Free energy profiles from TsNH radical ion and reactant **1a** to **VI**. Free energies are given in kcal/mol at the UM062X(D3)/6-31G(d)/SMD(CH<sub>2</sub>Cl);

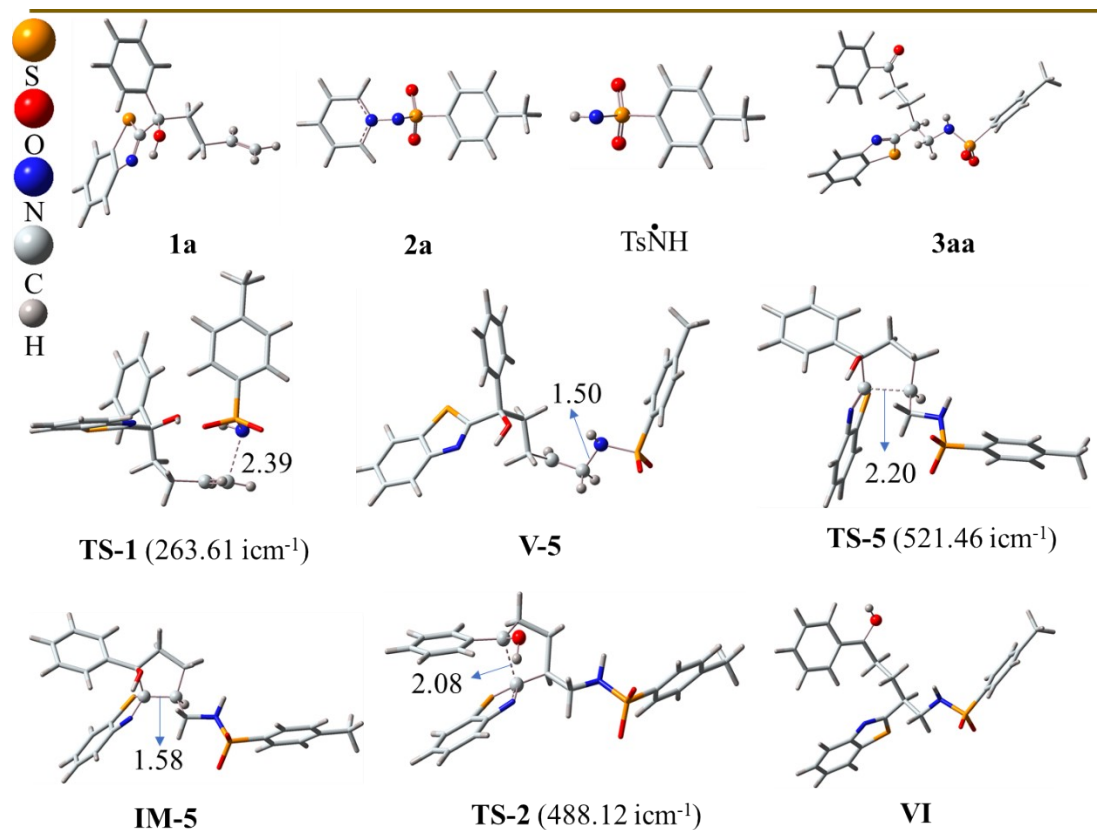

**Figure S6.** Optimized structures of reaction, production, and the transition state at M062X(D3)/6-31g(d) level with the SMD solvation model and dichloroethane as the solvent. UM062X(D3) functional was used for radical structure optimization. The data in brackets is the unique virtual frequency of the transition state. The bond length in Å.

**Table S7.** Standard orientation of All Stationary Points and the only imaginary frequencies of each transition state

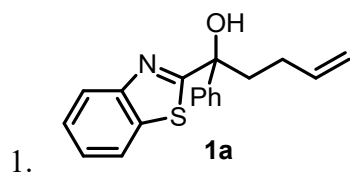

Charge = 0 Multiplicity = 1

| Center Number | Atomic Number | Atomic Type | Coordinates (Angstroms) |           |           |
|---------------|---------------|-------------|-------------------------|-----------|-----------|
|               |               |             | X                       | Y         | Z         |
| 1             | 6             | 0           | -2.722203               | -0.944445 | -0.970673 |
| 2             | 6             | 0           | -2.065993               | -0.780472 | 0.251090  |
| 3             | 6             | 0           | -2.203143               | -1.766268 | 1.233525  |
| 4             | 6             | 0           | -2.987207               | -2.891397 | 1.001692  |
| 5             | 6             | 0           | -3.642899               | -3.049349 | -0.219271 |
| 6             | 6             | 0           | -3.506964               | -2.074587 | -1.202931 |
| 7             | 1             | 0           | -2.636377               | -0.196153 | -1.752230 |
| 8             | 1             | 0           | -1.696104               | -1.634957 | 2.183885  |

|    |    |   |           |           |           |
|----|----|---|-----------|-----------|-----------|
| 9  | 1  | 0 | -3.087571 | -3.646564 | 1.775734  |
| 10 | 1  | 0 | -4.256053 | -3.926876 | -0.400988 |
| 11 | 1  | 0 | -4.014984 | -2.186225 | -2.156116 |
| 12 | 6  | 0 | -1.148590 | 0.410821  | 0.539992  |
| 13 | 8  | 0 | -1.253005 | 0.728507  | 1.912444  |
| 14 | 1  | 0 | -0.348604 | 0.875062  | 2.246461  |
| 15 | 6  | 0 | -1.499064 | 1.658187  | -0.298346 |
| 16 | 1  | 0 | -1.385019 | 1.442402  | -1.366598 |
| 17 | 1  | 0 | -2.557254 | 1.882653  | -0.120979 |
| 18 | 6  | 0 | -0.643550 | 2.876451  | 0.064165  |
| 19 | 1  | 0 | -0.762744 | 3.104722  | 1.128302  |
| 20 | 1  | 0 | 0.416528  | 2.639910  | -0.105106 |
| 21 | 6  | 0 | -1.021871 | 4.072362  | -0.761699 |
| 22 | 1  | 0 | -0.889017 | 3.970071  | -1.839805 |
| 23 | 6  | 0 | -1.511061 | 5.207222  | -0.268537 |
| 24 | 1  | 0 | -1.659948 | 5.341898  | 0.801098  |
| 25 | 1  | 0 | -1.777850 | 6.041801  | -0.911033 |
| 26 | 6  | 0 | 2.433020  | -0.709264 | -0.687614 |
| 27 | 6  | 0 | 2.462516  | -0.207682 | 0.627153  |
| 28 | 6  | 0 | 3.675352  | -0.136523 | 1.320991  |
| 29 | 6  | 0 | 4.829475  | -0.567331 | 0.685831  |
| 30 | 6  | 0 | 4.788420  | -1.066685 | -0.626259 |
| 31 | 6  | 0 | 3.593254  | -1.145166 | -1.328474 |
| 32 | 6  | 0 | 0.291959  | 0.001377  | 0.257944  |
| 33 | 1  | 0 | 3.691224  | 0.251846  | 2.334292  |
| 34 | 1  | 0 | 5.779316  | -0.518670 | 1.208528  |
| 35 | 1  | 0 | 5.706105  | -1.397844 | -1.101926 |
| 36 | 1  | 0 | 3.563613  | -1.531943 | -2.341875 |
| 37 | 7  | 0 | 1.226622  | 0.187831  | 1.124813  |
| 38 | 16 | 0 | 0.788982  | -0.686095 | -1.279148 |

-----  
0 imaginary frequencies

Zero-point Energies= -1223.635168  
Thermal Energies= -1223.616689  
Thermal Enthalpies= -1223.615745  
Thermal Free Energies= -1223.683855

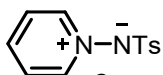

2. **2a** Charge = 0 Multiplicity = 1

| Center Number | Atomic Number | Atomic Type | Coordinates (Angstroms) |           |           |
|---------------|---------------|-------------|-------------------------|-----------|-----------|
|               |               |             | X                       | Y         | Z         |
| 1             | 6             | 0           | 2.897355                | 1.107402  | -0.666926 |
| 2             | 6             | 0           | 4.276779                | 1.130486  | -0.581325 |
| 3             | 6             | 0           | 4.968061                | -0.064078 | -0.398449 |
| 4             | 6             | 0           | 4.256019                | -1.256885 | -0.306671 |
| 5             | 6             | 0           | 2.877033                | -1.230319 | -0.398031 |

|    |    |   |           |           |           |
|----|----|---|-----------|-----------|-----------|
| 6  | 1  | 0 | 6.050725  | -0.065942 | -0.333007 |
| 7  | 1  | 0 | 2.275851  | 1.981085  | -0.813723 |
| 8  | 1  | 0 | 4.792701  | 2.079819  | -0.659585 |
| 9  | 1  | 0 | 4.755612  | -2.207789 | -0.165797 |
| 10 | 1  | 0 | 2.240163  | -2.103401 | -0.343231 |
| 11 | 7  | 0 | 2.228023  | -0.061107 | -0.578916 |
| 12 | 7  | 0 | 0.831706  | -0.066906 | -0.730586 |
| 13 | 16 | 0 | 0.170605  | 0.106845  | 0.753361  |
| 14 | 8  | 0 | 0.464333  | -1.038001 | 1.637246  |
| 15 | 8  | 0 | 0.444404  | 1.429020  | 1.348375  |
| 16 | 6  | 0 | -1.540834 | 0.040618  | 0.291953  |
| 17 | 6  | 0 | -2.244870 | 1.225721  | 0.107587  |
| 18 | 6  | 0 | -2.151286 | -1.198855 | 0.121835  |
| 19 | 6  | 0 | -3.585248 | 1.162475  | -0.260106 |
| 20 | 1  | 0 | -1.747237 | 2.179062  | 0.254681  |
| 21 | 6  | 0 | -3.490760 | -1.244357 | -0.247318 |
| 22 | 1  | 0 | -1.584017 | -2.110866 | 0.280905  |
| 23 | 6  | 0 | -4.224951 | -0.068223 | -0.441166 |
| 24 | 1  | 0 | -4.145066 | 2.082081  | -0.408438 |
| 25 | 1  | 0 | -3.977802 | -2.206021 | -0.385544 |
| 26 | 6  | 0 | -5.684073 | -0.127476 | -0.807408 |
| 27 | 1  | 0 | -6.305922 | -0.149261 | 0.095057  |
| 28 | 1  | 0 | -5.981069 | 0.747743  | -1.391546 |
| 29 | 1  | 0 | -5.910958 | -1.027150 | -1.385864 |

0 imaginary frequencies

Zero-point Energies= -1121.985069  
 Thermal Energies= -1121.970123  
 Thermal Enthalpies= -1121.969179  
 Thermal Free Energies= -1122.031198

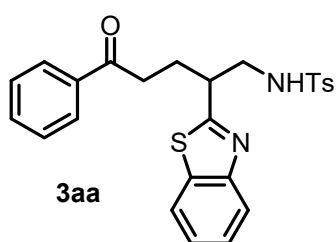

3. Charge = 0 Multiplicity = 1

| Center Number | Atomic Number | Atomic Type | Coordinates (Angstroms) |           |           |
|---------------|---------------|-------------|-------------------------|-----------|-----------|
|               |               |             | X                       | Y         | Z         |
| 1             | 6             | 0           | 0.708539                | 2.046906  | 1.186658  |
| 2             | 6             | 0           | 0.632279                | 1.755805  | -0.190018 |
| 3             | 6             | 0           | 0.976595                | 2.736595  | -1.128188 |
| 4             | 6             | 0           | 1.394999                | 3.976998  | -0.673512 |
| 5             | 6             | 0           | 1.481699                | 4.250929  | 0.702261  |
| 6             | 6             | 0           | 1.138746                | 3.292956  | 1.646984  |
| 7             | 6             | 0           | -0.046091               | -0.204812 | 0.571256  |
| 8             | 1             | 0           | 0.916113                | 2.506246  | -2.187634 |

|    |    |   |           |           |           |
|----|----|---|-----------|-----------|-----------|
| 9  | 1  | 0 | 1.666265  | 4.747797  | -1.388309 |
| 10 | 1  | 0 | 1.816784  | 5.228886  | 1.033635  |
| 11 | 1  | 0 | 1.201144  | 3.507625  | 2.709037  |
| 12 | 7  | 0 | 0.207893  | 0.471297  | -0.498404 |
| 13 | 16 | 0 | 0.210999  | 0.643153  | 2.090446  |
| 14 | 6  | 0 | -0.531738 | -1.631105 | 0.546093  |
| 15 | 1  | 0 | -0.795848 | -1.934394 | 1.567144  |
| 16 | 6  | 0 | 0.603593  | -2.530647 | 0.046219  |
| 17 | 1  | 0 | 0.244075  | -3.555578 | -0.093100 |
| 18 | 1  | 0 | 0.942649  | -2.157163 | -0.925928 |
| 19 | 6  | 0 | -1.762610 | -1.777935 | -0.356384 |
| 20 | 1  | 0 | -2.064756 | -2.830217 | -0.367219 |
| 21 | 1  | 0 | -1.489618 | -1.511884 | -1.383249 |
| 22 | 7  | 0 | 1.729092  | -2.484523 | 0.984298  |
| 23 | 1  | 0 | 1.636069  | -3.100488 | 1.792470  |
| 24 | 16 | 0 | 3.259533  | -2.618747 | 0.358855  |
| 25 | 8  | 0 | 3.295811  | -3.529631 | -0.783300 |
| 26 | 8  | 0 | 4.118142  | -2.884073 | 1.509985  |
| 27 | 6  | 0 | 3.565592  | -0.982671 | -0.251299 |
| 28 | 6  | 0 | 3.642418  | -0.763158 | -1.623100 |
| 29 | 6  | 0 | 3.750698  | 0.052120  | 0.664289  |
| 30 | 6  | 0 | 3.925791  | 0.519728  | -2.080765 |
| 31 | 1  | 0 | 3.492245  | -1.586020 | -2.314405 |
| 32 | 6  | 0 | 4.038732  | 1.325425  | 0.187517  |
| 33 | 1  | 0 | 3.681207  | -0.139918 | 1.731209  |
| 34 | 6  | 0 | 4.141257  | 1.573658  | -1.186840 |
| 35 | 1  | 0 | 3.990300  | 0.704194  | -3.149864 |
| 36 | 1  | 0 | 4.186235  | 2.141088  | 0.890396  |
| 37 | 6  | 0 | 4.494634  | 2.943041  | -1.701385 |
| 38 | 1  | 0 | 5.527873  | 2.957385  | -2.066971 |
| 39 | 1  | 0 | 3.848135  | 3.227940  | -2.537221 |
| 40 | 1  | 0 | 4.402062  | 3.698078  | -0.916795 |
| 41 | 6  | 0 | -2.929518 | -0.915891 | 0.105011  |
| 42 | 1  | 0 | -2.673518 | 0.151048  | 0.051270  |
| 43 | 1  | 0 | -3.172632 | -1.116307 | 1.157510  |
| 44 | 6  | 0 | -4.176969 | -1.141282 | -0.725108 |
| 45 | 8  | 0 | -4.180295 | -1.930525 | -1.652080 |
| 46 | 6  | 0 | -5.416509 | -0.371216 | -0.378853 |
| 47 | 6  | 0 | -5.448787 | 0.563609  | 0.661013  |
| 48 | 6  | 0 | -6.573847 | -0.608536 | -1.128666 |
| 49 | 6  | 0 | -6.625905 | 1.251223  | 0.945601  |
| 50 | 1  | 0 | -4.559949 | 0.763178  | 1.251504  |
| 51 | 6  | 0 | -7.748179 | 0.077073  | -0.843379 |
| 52 | 1  | 0 | -6.533342 | -1.336458 | -1.932833 |
| 53 | 6  | 0 | -7.775000 | 1.008242  | 0.195749  |
| 54 | 1  | 0 | -6.645391 | 1.976270  | 1.753328  |
| 55 | 1  | 0 | -8.643159 | -0.112463 | -1.428030 |
| 56 | 1  | 0 | -8.692137 | 1.544745  | 0.420214  |

-----  
0 imaginary frequencies

Zero-point Energies= -2097.623894  
 Thermal Energies= -2097.595398  
 Thermal Enthalpies= -2097.594454  
 Thermal Free Energies= -2097.686423

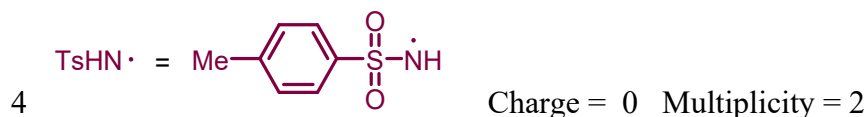

| Center Number | Atomic Number | Atomic Type | Coordinates (Angstroms) |           |           |
|---------------|---------------|-------------|-------------------------|-----------|-----------|
|               |               |             | X                       | Y         | Z         |
| 1             | 7             | 0           | -2.309295               | -0.002082 | 1.532549  |
| 2             | 16            | 0           | -1.901626               | 0.000110  | -0.097575 |
| 3             | 8             | 0           | -2.371241               | -1.264092 | -0.655551 |
| 4             | 8             | 0           | -2.371452               | 1.265552  | -0.652500 |
| 5             | 6             | 0           | -0.138754               | 0.000208  | -0.060390 |
| 6             | 6             | 0           | 0.536661                | 1.217645  | -0.039176 |
| 7             | 6             | 0           | 0.536760                | -1.217324 | -0.039322 |
| 8             | 6             | 0           | 1.925442                | 1.205789  | 0.007192  |
| 9             | 1             | 0           | -0.014029               | 2.152556  | -0.063817 |
| 10            | 6             | 0           | 1.925399                | -1.205403 | 0.007058  |
| 11            | 1             | 0           | -0.013908               | -2.152248 | -0.064091 |
| 12            | 6             | 0           | 2.636296                | 0.000262  | 0.029317  |
| 13            | 1             | 0           | 2.468211                | 2.146624  | 0.024082  |
| 14            | 1             | 0           | 2.468256                | -2.146210 | 0.023850  |
| 15            | 6             | 0           | 4.140661                | -0.000317 | 0.045327  |
| 16            | 1             | 0           | 4.531614                | -0.013522 | -0.978618 |
| 17            | 1             | 0           | 4.531413                | 0.894114  | 0.537383  |
| 18            | 1             | 0           | 4.530125                | -0.883049 | 0.559209  |
| 19            | 1             | 0           | -3.343842               | -0.002288 | 1.559737  |

0 imaginary frequencies

Zero-point Energies= -874.449590  
 Thermal Energies= -874.438703  
 Thermal Enthalpies= -874.437759  
 Thermal Free Energies= -874.488320

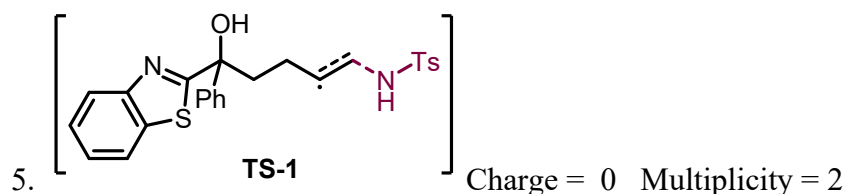

| Center Number | Atomic Number | Atomic Type | Coordinates (Angstroms) |          |          |
|---------------|---------------|-------------|-------------------------|----------|----------|
|               |               |             | X                       | Y        | Z        |
| 1             | 6             | 0           | 2.353089                | 3.176094 | 1.053416 |

|    |    |   |           |           |           |
|----|----|---|-----------|-----------|-----------|
| 2  | 6  | 0 | 1.373342  | 2.338404  | 0.513998  |
| 3  | 6  | 0 | 0.571187  | 2.811291  | -0.528365 |
| 4  | 6  | 0 | 0.741429  | 4.102837  | -1.017758 |
| 5  | 6  | 0 | 1.721040  | 4.935104  | -0.477665 |
| 6  | 6  | 0 | 2.526307  | 4.467729  | 0.557136  |
| 7  | 1  | 0 | 2.986597  | 2.835006  | 1.867135  |
| 8  | 1  | 0 | -0.193806 | 2.163039  | -0.943228 |
| 9  | 1  | 0 | 0.106911  | 4.460235  | -1.823390 |
| 10 | 1  | 0 | 1.853678  | 5.942542  | -0.860270 |
| 11 | 1  | 0 | 3.289948  | 5.108665  | 0.987237  |
| 12 | 6  | 0 | 1.197788  | 0.898388  | 0.991705  |
| 13 | 8  | 0 | -0.150739 | 0.528730  | 0.802679  |
| 14 | 1  | 0 | -0.183602 | -0.434763 | 0.616073  |
| 15 | 6  | 0 | 1.594888  | 0.711194  | 2.475745  |
| 16 | 1  | 0 | 2.684556  | 0.743594  | 2.566493  |
| 17 | 1  | 0 | 1.201751  | 1.565706  | 3.038613  |
| 18 | 6  | 0 | 1.058220  | -0.595733 | 3.085552  |
| 19 | 1  | 0 | 1.015056  | -1.404884 | 2.345312  |
| 20 | 1  | 0 | 1.771111  | -0.922908 | 3.854973  |
| 21 | 6  | 0 | -0.267340 | -0.438108 | 3.767162  |
| 22 | 1  | 0 | -0.398964 | 0.481983  | 4.338027  |
| 23 | 6  | 0 | -1.270191 | -1.344877 | 3.773546  |
| 24 | 1  | 0 | -1.161724 | -2.300581 | 3.265653  |
| 25 | 1  | 0 | -2.130062 | -1.220575 | 4.422170  |
| 26 | 6  | 0 | 3.810303  | -1.206843 | -1.098032 |
| 27 | 6  | 0 | 2.545809  | -1.823622 | -1.060901 |
| 28 | 6  | 0 | 2.345897  | -3.051911 | -1.700081 |
| 29 | 6  | 0 | 3.414320  | -3.636575 | -2.361398 |
| 30 | 6  | 0 | 4.672339  | -3.012368 | -2.393309 |
| 31 | 6  | 0 | 4.886846  | -1.792678 | -1.765471 |
| 32 | 6  | 0 | 2.049560  | -0.024075 | 0.123731  |
| 33 | 1  | 0 | 1.367140  | -3.519656 | -1.663519 |
| 34 | 1  | 0 | 3.279178  | -4.590050 | -2.861867 |
| 35 | 1  | 0 | 5.493573  | -3.490819 | -2.917508 |
| 36 | 1  | 0 | 5.859964  | -1.313319 | -1.792288 |
| 37 | 7  | 0 | 1.576475  | -1.120378 | -0.357183 |
| 38 | 16 | 0 | 3.741182  | 0.307749  | -0.230162 |
| 39 | 7  | 0 | -2.664877 | -0.264468 | 2.166694  |
| 40 | 1  | 0 | -1.901693 | 0.363984  | 1.862558  |
| 41 | 16 | 0 | -2.720533 | -1.498887 | 1.048159  |
| 42 | 8  | 0 | -3.673464 | -2.491179 | 1.533789  |
| 43 | 8  | 0 | -1.376919 | -1.966102 | 0.665735  |
| 44 | 6  | 0 | -3.408734 | -0.641391 | -0.341618 |
| 45 | 6  | 0 | -4.781786 | -0.396256 | -0.370904 |
| 46 | 6  | 0 | -2.563578 | -0.192673 | -1.354137 |
| 47 | 6  | 0 | -5.310609 | 0.310264  | -1.442198 |
| 48 | 1  | 0 | -5.419633 | -0.758627 | 0.429706  |
| 49 | 6  | 0 | -3.114881 | 0.512795  | -2.418589 |
| 50 | 1  | 0 | -1.497873 | -0.395919 | -1.311253 |
| 51 | 6  | 0 | -4.487903 | 0.773527  | -2.477869 |



|    |   |   |           |          |           |
|----|---|---|-----------|----------|-----------|
| 52 | 1 | 0 | -6.378489 | 0.507631 | -1.480210 |
| 53 | 1 | 0 | -2.468801 | 0.864799 | -3.218083 |
| 54 | 6 | 0 | -5.082447 | 1.517269 | -3.642661 |
| 55 | 1 | 0 | -4.315399 | 2.061683 | -4.198836 |
| 56 | 1 | 0 | -5.567853 | 0.819161 | -4.334202 |
| 57 | 1 | 0 | -5.843546 | 2.227902 | -3.307684 |

-----  
 1 imaginary frequencies (-263.61)

Zero-point Energies= -2098.097746

Thermal Energies= -2098.06841

Thermal Enthalpies= -2098.067466

Thermal Free Energies= -2098.163058

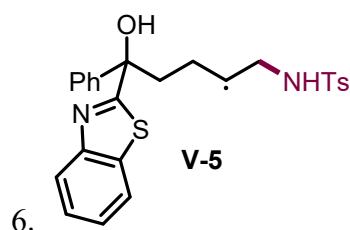

Charge = 0 Multiplicity = 2

| Center Number | Atomic Number | Atomic Type | Coordinates (Angstroms) |           |           |
|---------------|---------------|-------------|-------------------------|-----------|-----------|
|               |               |             | X                       | Y         | Z         |
| 1             | 6             | 0           | -1.182977               | 2.688153  | -0.871851 |
| 2             | 6             | 0           | -1.592074               | 2.095544  | 0.324746  |
| 3             | 6             | 0           | -2.009490               | 2.912795  | 1.379911  |
| 4             | 6             | 0           | -2.011638               | 4.296951  | 1.243991  |
| 5             | 6             | 0           | -1.599747               | 4.884392  | 0.047832  |
| 6             | 6             | 0           | -1.187084               | 4.076880  | -1.007484 |
| 7             | 1             | 0           | -0.851649               | 2.080778  | -1.708173 |
| 8             | 1             | 0           | -2.322814               | 2.450535  | 2.310313  |
| 9             | 1             | 0           | -2.335208               | 4.918844  | 2.073420  |
| 10            | 1             | 0           | -1.600217               | 5.964924  | -0.059128 |
| 11            | 1             | 0           | -0.861836               | 4.523677  | -1.942185 |
| 12            | 6             | 0           | -1.660511               | 0.577351  | 0.510596  |
| 13            | 8             | 0           | -1.354875               | 0.280090  | 1.857247  |
| 14            | 1             | 0           | -2.005935               | -0.377935 | 2.164486  |
| 15            | 6             | 0           | -0.684278               | -0.183950 | -0.411653 |
| 16            | 1             | 0           | -0.932764               | -0.004004 | -1.463158 |
| 17            | 1             | 0           | 0.314842                | 0.232920  | -0.238019 |
| 18            | 6             | 0           | -0.680384               | -1.700708 | -0.153379 |
| 19            | 1             | 0           | -0.459505               | -1.884576 | 0.904470  |
| 20            | 1             | 0           | -1.690380               | -2.092933 | -0.345145 |
| 21            | 6             | 0           | 0.310061                | -2.412010 | -1.014210 |
| 22            | 1             | 0           | 0.197773                | -2.353821 | -2.092940 |
| 23            | 6             | 0           | 1.597346                | -2.918994 | -0.465253 |
| 24            | 1             | 0           | 1.435928                | -3.427305 | 0.495020  |
| 25            | 1             | 0           | 2.073827                | -3.617353 | -1.156501 |
| 26            | 6             | 0           | -5.272231               | -0.458347 | -0.697502 |

|    |    |   |           |           |           |
|----|----|---|-----------|-----------|-----------|
| 27 | 6  | 0 | -4.970885 | -0.991626 | 0.569803  |
| 28 | 6  | 0 | -5.903530 | -1.800965 | 1.227462  |
| 29 | 6  | 0 | -7.114546 | -2.058604 | 0.604556  |
| 30 | 6  | 0 | -7.405548 | -1.520023 | -0.659534 |
| 31 | 6  | 0 | -6.491817 | -0.714142 | -1.325297 |
| 32 | 6  | 0 | -3.083380 | 0.109962  | 0.232973  |
| 33 | 1  | 0 | -5.664208 | -2.209842 | 2.203913  |
| 34 | 1  | 0 | -7.849726 | -2.685159 | 1.099252  |
| 35 | 1  | 0 | -8.361220 | -1.736338 | -1.126432 |
| 36 | 1  | 0 | -6.719043 | -0.298466 | -2.301585 |
| 37 | 7  | 0 | -3.716938 | -0.647403 | 1.060542  |
| 38 | 16 | 0 | -3.928576 | 0.511426  | -1.252192 |
| 39 | 7  | 0 | 2.547139  | -1.777018 | -0.292649 |
| 40 | 1  | 0 | 2.174941  | -1.091323 | 0.370474  |
| 41 | 16 | 0 | 4.077780  | -2.222340 | 0.210950  |
| 42 | 8  | 0 | 4.566429  | -3.177099 | -0.781416 |
| 43 | 8  | 0 | 4.104671  | -2.617551 | 1.620529  |
| 44 | 6  | 0 | 4.937032  | -0.681881 | 0.052048  |
| 45 | 6  | 0 | 5.130265  | -0.145278 | -1.221887 |
| 46 | 6  | 0 | 5.413551  | -0.045589 | 1.191102  |
| 47 | 6  | 0 | 5.810389  | 1.056972  | -1.342699 |
| 48 | 1  | 0 | 4.751665  | -0.662757 | -2.098365 |
| 49 | 6  | 0 | 6.095646  | 1.161131  | 1.048476  |
| 50 | 1  | 0 | 5.254428  | -0.488597 | 2.168795  |
| 51 | 6  | 0 | 6.300689  | 1.726830  | -0.211427 |
| 52 | 1  | 0 | 5.968373  | 1.487947  | -2.327832 |
| 53 | 1  | 0 | 6.474177  | 1.668686  | 1.931144  |
| 54 | 6  | 0 | 7.028147  | 3.034854  | -0.367861 |
| 55 | 1  | 0 | 7.412587  | 3.393025  | 0.590017  |
| 56 | 1  | 0 | 7.868693  | 2.932021  | -1.061672 |
| 57 | 1  | 0 | 6.360759  | 3.800912  | -0.777188 |

-----  
0 imaginary frequencies

Zero-point Energies= -2098.129726  
Thermal Energies= -2098.099892  
Thermal Enthalpies= -2098.098948  
Thermal Free Energies= -2098.198310

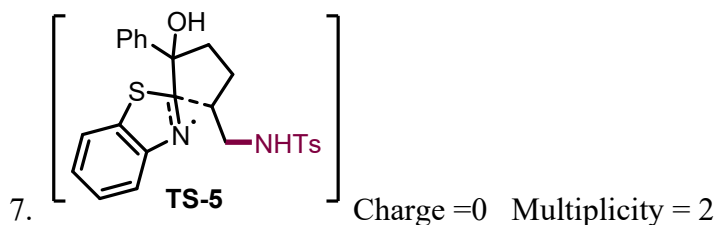

-----

| Center Number | Atomic Number | Atomic Type | Coordinates (Angstroms) |           |          |
|---------------|---------------|-------------|-------------------------|-----------|----------|
|               |               |             | X                       | Y         | Z        |
| 1             | 6             | 0           | -4.816828               | -2.326771 | 0.869917 |

-----

|    |    |   |           |           |           |
|----|----|---|-----------|-----------|-----------|
| 2  | 6  | 0 | -4.104880 | -1.644195 | -0.117122 |
| 3  | 6  | 0 | -4.812615 | -1.016516 | -1.148533 |
| 4  | 6  | 0 | -6.200849 | -1.072980 | -1.194062 |
| 5  | 6  | 0 | -6.906036 | -1.759914 | -0.205142 |
| 6  | 6  | 0 | -6.210567 | -2.385326 | 0.824473  |
| 7  | 1  | 0 | -4.295083 | -2.824145 | 1.681362  |
| 8  | 1  | 0 | -4.271951 | -0.476448 | -1.921787 |
| 9  | 1  | 0 | -6.733836 | -0.580106 | -2.001656 |
| 10 | 1  | 0 | -7.990352 | -1.805704 | -0.239587 |
| 11 | 1  | 0 | -6.749090 | -2.924624 | 1.598092  |
| 12 | 6  | 0 | -2.576488 | -1.542212 | -0.115950 |
| 13 | 8  | 0 | -2.063460 | -1.858896 | -1.396230 |
| 14 | 1  | 0 | -2.054693 | -1.032305 | -1.913835 |
| 15 | 6  | 0 | -1.877809 | -2.456471 | 0.887281  |
| 16 | 1  | 0 | -2.212339 | -2.215116 | 1.902909  |
| 17 | 1  | 0 | -2.131038 | -3.502658 | 0.691240  |
| 18 | 6  | 0 | -0.370920 | -2.199571 | 0.756485  |
| 19 | 1  | 0 | 0.156374  | -2.644869 | 1.608415  |
| 20 | 1  | 0 | -0.007404 | -2.677023 | -0.158375 |
| 21 | 6  | 0 | -0.116527 | -0.718279 | 0.691090  |
| 22 | 1  | 0 | -0.006197 | -0.195613 | 1.638845  |
| 23 | 6  | 0 | 0.716708  | -0.169654 | -0.426429 |
| 24 | 1  | 0 | 0.404810  | -0.604633 | -1.383697 |
| 25 | 1  | 0 | 0.621502  | 0.917542  | -0.483821 |
| 26 | 6  | 0 | -2.449644 | 2.242834  | 0.955979  |
| 27 | 6  | 0 | -2.093757 | 2.059552  | -0.400625 |
| 28 | 6  | 0 | -1.849651 | 3.180266  | -1.210043 |
| 29 | 6  | 0 | -1.964721 | 4.444301  | -0.655733 |
| 30 | 6  | 0 | -2.317051 | 4.611767  | 0.693708  |
| 31 | 6  | 0 | -2.559765 | 3.515648  | 1.513265  |
| 32 | 6  | 0 | -2.169220 | -0.090669 | 0.188148  |
| 33 | 1  | 0 | -1.572799 | 3.035324  | -2.249522 |
| 34 | 1  | 0 | -1.775898 | 5.318796  | -1.270257 |
| 35 | 1  | 0 | -2.400497 | 5.612427  | 1.105719  |
| 36 | 1  | 0 | -2.830276 | 3.648608  | 2.555826  |
| 37 | 7  | 0 | -2.018806 | 0.752094  | -0.817600 |
| 38 | 16 | 0 | -2.703291 | 0.689336  | 1.711524  |
| 39 | 7  | 0 | 2.140463  | -0.468393 | -0.129038 |
| 40 | 1  | 0 | 2.315404  | -1.477397 | -0.125369 |
| 41 | 16 | 0 | 3.227628  | 0.256961  | -1.174978 |
| 42 | 8  | 0 | 2.955744  | 1.690339  | -1.108697 |
| 43 | 8  | 0 | 3.237103  | -0.385794 | -2.489801 |
| 44 | 6  | 0 | 4.757739  | -0.113348 | -0.365394 |
| 45 | 6  | 0 | 5.026168  | 0.473931  | 0.872109  |
| 46 | 6  | 0 | 5.667073  | -0.963011 | -0.982541 |
| 47 | 6  | 0 | 6.230987  | 0.189981  | 1.496746  |
| 48 | 1  | 0 | 4.301613  | 1.138985  | 1.332680  |
| 49 | 6  | 0 | 6.872651  | -1.234710 | -0.338852 |
| 50 | 1  | 0 | 5.434930  | -1.399870 | -1.948343 |
| 51 | 6  | 0 | 7.169120  | -0.667445 | 0.902027  |

|    |   |   |          |           |           |
|----|---|---|----------|-----------|-----------|
| 52 | 1 | 0 | 6.455162 | 0.639243  | 2.460620  |
| 53 | 1 | 0 | 7.593297 | -1.896901 | -0.810127 |
| 54 | 6 | 0 | 8.467792 | -0.963301 | 1.602224  |
| 55 | 1 | 0 | 9.106515 | -1.610975 | 0.997117  |
| 56 | 1 | 0 | 9.014525 | -0.038503 | 1.813368  |
| 57 | 1 | 0 | 8.285766 | -1.459328 | 2.561580  |

-----  
 1 imaginary frequencies (-521.46)

Zero-point Energies= -2098.120979

Thermal Energies= -2098.092470

Thermal Enthalpies= -2098.091526

Thermal Free Energies= -2098.184437

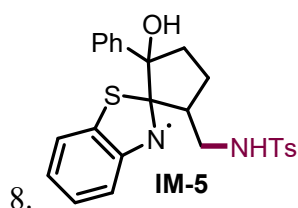

Charge = 0 Multiplicity = 2

| Center Number | Atomic Number | Atomic Type | Coordinates (Angstroms) |           |           |
|---------------|---------------|-------------|-------------------------|-----------|-----------|
|               |               |             | X                       | Y         | Z         |
| 1             | 6             | 0           | -4.330338               | -2.408821 | 0.723884  |
| 2             | 6             | 0           | -3.627814               | -1.688816 | -0.246734 |
| 3             | 6             | 0           | -4.355917               | -1.034436 | -1.247651 |
| 4             | 6             | 0           | -5.746913               | -1.086608 | -1.270153 |
| 5             | 6             | 0           | -6.436176               | -1.805578 | -0.295793 |
| 6             | 6             | 0           | -5.722358               | -2.469746 | 0.698330  |
| 7             | 1             | 0           | -3.796369               | -2.932500 | 1.510434  |
| 8             | 1             | 0           | -3.837203               | -0.479506 | -2.024237 |
| 9             | 1             | 0           | -6.290998               | -0.568106 | -2.053977 |
| 10            | 1             | 0           | -7.520938               | -1.851120 | -0.314271 |
| 11            | 1             | 0           | -6.247661               | -3.039329 | 1.459259  |
| 12            | 6             | 0           | -2.110287               | -1.590082 | -0.247062 |
| 13            | 8             | 0           | -1.596664               | -1.740995 | -1.561430 |
| 14            | 1             | 0           | -1.724182               | -0.890814 | -2.019350 |
| 15            | 6             | 0           | -1.343579               | -2.583731 | 0.619577  |
| 16            | 1             | 0           | -1.732148               | -2.571408 | 1.642894  |
| 17            | 1             | 0           | -1.438616               | -3.601515 | 0.230990  |
| 18            | 6             | 0           | 0.092790                | -2.048826 | 0.585188  |
| 19            | 1             | 0           | 0.673231                | -2.369564 | 1.453297  |
| 20            | 1             | 0           | 0.595110                | -2.421988 | -0.313178 |
| 21            | 6             | 0           | -0.028624               | -0.503606 | 0.511533  |
| 22            | 1             | 0           | 0.282108                | -0.048741 | 1.455350  |
| 23            | 6             | 0           | 0.845198                | 0.104730  | -0.583353 |
| 24            | 1             | 0           | 0.580434                | -0.311584 | -1.562323 |
| 25            | 1             | 0           | 0.717265                | 1.188561  | -0.615190 |
| 26            | 6             | 0           | -3.097287               | 1.641234  | 1.131792  |
| 27            | 6             | 0           | -2.659235               | 1.745954  | -0.233410 |

|    |    |   |           |           |           |
|----|----|---|-----------|-----------|-----------|
| 28 | 6  | 0 | -3.143498 | 2.823284  | -1.029237 |
| 29 | 6  | 0 | -4.012316 | 3.733444  | -0.474111 |
| 30 | 6  | 0 | -4.428406 | 3.610787  | 0.870107  |
| 31 | 6  | 0 | -3.976634 | 2.569856  | 1.676387  |
| 32 | 6  | 0 | -1.550390 | -0.204466 | 0.281883  |
| 33 | 1  | 0 | -2.812700 | 2.897909  | -2.060102 |
| 34 | 1  | 0 | -4.388164 | 4.556910  | -1.072683 |
| 35 | 1  | 0 | -5.116375 | 4.341305  | 1.283327  |
| 36 | 1  | 0 | -4.306853 | 2.486029  | 2.706529  |
| 37 | 7  | 0 | -1.826286 | 0.812082  | -0.677757 |
| 38 | 16 | 0 | -2.366804 | 0.269087  | 1.899828  |
| 39 | 7  | 0 | 2.255811  | -0.165324 | -0.240606 |
| 40 | 1  | 0 | 2.469015  | -1.165805 | -0.274664 |
| 41 | 16 | 0 | 3.365453  | 0.640736  | -1.194970 |
| 42 | 8  | 0 | 3.068904  | 2.063717  | -1.052026 |
| 43 | 8  | 0 | 3.437103  | 0.083677  | -2.546599 |
| 44 | 6  | 0 | 4.868205  | 0.239522  | -0.349298 |
| 45 | 6  | 0 | 5.061529  | 0.715667  | 0.948580  |
| 46 | 6  | 0 | 5.833207  | -0.519449 | -0.998992 |
| 47 | 6  | 0 | 6.246970  | 0.411418  | 1.600213  |
| 48 | 1  | 0 | 4.293664  | 1.309670  | 1.435372  |
| 49 | 6  | 0 | 7.018559  | -0.812587 | -0.327618 |
| 50 | 1  | 0 | 5.658463  | -0.871890 | -2.010293 |
| 51 | 6  | 0 | 7.240426  | -0.355612 | 0.972818  |
| 52 | 1  | 0 | 6.411598  | 0.772800  | 2.611867  |
| 53 | 1  | 0 | 7.781811  | -1.404857 | -0.824159 |
| 54 | 6  | 0 | 8.519717  | -0.670087 | 1.700031  |
| 55 | 1  | 0 | 9.178790  | -1.294303 | 1.092053  |
| 56 | 1  | 0 | 9.056109  | 0.250037  | 1.955008  |
| 57 | 1  | 0 | 8.313823  | -1.196513 | 2.637826  |

0 imaginary frequencies

Zero-point Energies= -2098.153990  
 Thermal Energies= -2098.125707  
 Thermal Enthalpies= -2098.124762  
 Thermal Free Energies= -2098.218073

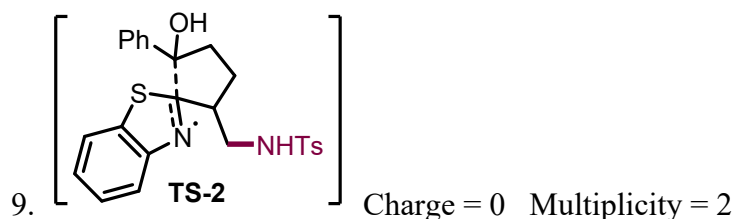

| Center Number | Atomic Number | Atomic Type | Coordinates (Angstroms) |           |           |
|---------------|---------------|-------------|-------------------------|-----------|-----------|
|               |               |             | X                       | Y         | Z         |
| 1             | 6             | 0           | 4.160398                | -2.276322 | -0.513446 |
| 2             | 6             | 0           | 3.538065                | -1.642623 | 0.577678  |

|    |    |   |           |           |           |
|----|----|---|-----------|-----------|-----------|
| 3  | 6  | 0 | 4.344893  | -0.930550 | 1.483359  |
| 4  | 6  | 0 | 5.717543  | -0.829621 | 1.289129  |
| 5  | 6  | 0 | 6.317589  | -1.447956 | 0.193242  |
| 6  | 6  | 0 | 5.534130  | -2.180971 | -0.698767 |
| 7  | 1  | 0 | 3.570231  | -2.845967 | -1.223322 |
| 8  | 1  | 0 | 3.895899  | -0.454434 | 2.349435  |
| 9  | 1  | 0 | 6.319318  | -0.266555 | 1.996162  |
| 10 | 1  | 0 | 7.389335  | -1.367321 | 0.039258  |
| 11 | 1  | 0 | 5.995952  | -2.678639 | -1.546215 |
| 12 | 6  | 0 | 2.079380  | -1.634645 | 0.739053  |
| 13 | 8  | 0 | 1.596357  | -1.271887 | 1.970474  |
| 14 | 1  | 0 | 1.790247  | -0.320378 | 2.099087  |
| 15 | 6  | 0 | 1.164875  | -2.616860 | 0.065311  |
| 16 | 1  | 0 | 1.508358  | -2.812591 | -0.954814 |
| 17 | 1  | 0 | 1.157755  | -3.573283 | 0.603485  |
| 18 | 6  | 0 | -0.221588 | -1.974323 | 0.056798  |
| 19 | 1  | 0 | -0.911005 | -2.521412 | -0.591203 |
| 20 | 1  | 0 | -0.623943 | -2.004173 | 1.074870  |
| 21 | 6  | 0 | -0.086497 | -0.498234 | -0.400633 |
| 22 | 1  | 0 | -0.416275 | -0.422696 | -1.442315 |
| 23 | 6  | 0 | -0.973359 | 0.437990  | 0.420034  |
| 24 | 1  | 0 | -0.685375 | 0.396478  | 1.477595  |
| 25 | 1  | 0 | -0.866083 | 1.466405  | 0.068836  |
| 26 | 6  | 0 | 3.381535  | 1.136740  | -1.252855 |
| 27 | 6  | 0 | 2.923366  | 1.556700  | 0.022763  |
| 28 | 6  | 0 | 3.675679  | 2.501033  | 0.746616  |
| 29 | 6  | 0 | 4.854896  | 2.980330  | 0.204259  |
| 30 | 6  | 0 | 5.305210  | 2.539620  | -1.052539 |
| 31 | 6  | 0 | 4.573921  | 1.615542  | -1.790956 |
| 32 | 6  | 0 | 1.368951  | -0.010168 | -0.355592 |
| 33 | 1  | 0 | 3.323853  | 2.823287  | 1.721913  |
| 34 | 1  | 0 | 5.446127  | 3.702506  | 0.758705  |
| 35 | 1  | 0 | 6.237195  | 2.924771  | -1.453870 |
| 36 | 1  | 0 | 4.924391  | 1.275482  | -2.760297 |
| 37 | 7  | 0 | 1.766766  | 0.977458  | 0.462869  |
| 38 | 16 | 0 | 2.247876  | -0.000593 | -1.926461 |
| 39 | 7  | 0 | -2.380655 | 0.040787  | 0.220083  |
| 40 | 1  | 0 | -2.577327 | -0.877546 | 0.627295  |
| 41 | 16 | 0 | -3.497677 | 1.129793  | 0.821423  |
| 42 | 8  | 0 | -3.226591 | 2.401466  | 0.156796  |
| 43 | 8  | 0 | -3.549279 | 1.111320  | 2.283872  |
| 44 | 6  | 0 | -4.998914 | 0.423894  | 0.203589  |
| 45 | 6  | 0 | -5.222647 | 0.411678  | -1.174169 |
| 46 | 6  | 0 | -5.931665 | -0.084400 | 1.098626  |
| 47 | 6  | 0 | -6.406159 | -0.129996 | -1.652014 |
| 48 | 1  | 0 | -4.480362 | 0.818434  | -1.854582 |
| 49 | 6  | 0 | -7.115282 | -0.623400 | 0.598323  |
| 50 | 1  | 0 | -5.734178 | -0.056174 | 2.165258  |
| 51 | 6  | 0 | -7.367385 | -0.654458 | -0.774535 |
| 52 | 1  | 0 | -6.595317 | -0.147516 | -2.722062 |

|    |   |   |           |           |           |
|----|---|---|-----------|-----------|-----------|
| 53 | 1 | 0 | -7.853329 | -1.024144 | 1.287253  |
| 54 | 6 | 0 | -8.644426 | -1.235917 | -1.318118 |
| 55 | 1 | 0 | -9.197414 | -0.485713 | -1.892994 |
| 56 | 1 | 0 | -8.433139 | -2.071748 | -1.993361 |
| 57 | 1 | 0 | -9.289818 | -1.597674 | -0.514231 |

-----  
 1 imaginary frequencies (-488.12)

Zero-point Energies= -2098.139381

Thermal Energies= -2098.111198

Thermal Enthalpies= -2098.110254

Thermal Free Energies= -2098.202551

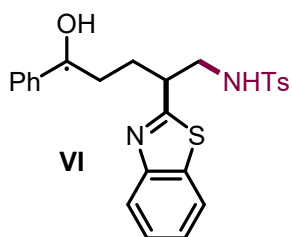

10. Charge = 0 Multiplicity = 2

| Center Number | Atomic Number | Atomic Type | Coordinates (Angstroms) |           |           |
|---------------|---------------|-------------|-------------------------|-----------|-----------|
|               |               |             | X                       | Y         | Z         |
| 1             | 15            | 0           | -0.008074               | 1.216122  | -0.288557 |
| 2             | 1             | 0           | 0.088132                | 1.906497  | -1.492684 |
| 3             | 6             | 0           | 1.478405                | 0.264036  | -0.098256 |
| 4             | 6             | 0           | 1.580902                | -0.701472 | 0.913962  |
| 5             | 6             | 0           | 2.562519                | 0.545306  | -0.939007 |
| 6             | 6             | 0           | 2.780379                | -1.381565 | 1.080188  |
| 7             | 1             | 0           | 0.732122                | -0.923506 | 1.556394  |
| 8             | 6             | 0           | 3.755407                | -0.147483 | -0.765173 |
| 9             | 1             | 0           | 2.470637                | 1.290909  | -1.724213 |
| 10            | 6             | 0           | 3.861958                | -1.103871 | 0.242781  |
| 11            | 1             | 0           | 2.872300                | -2.130661 | 1.859542  |
| 12            | 1             | 0           | 4.598885                | 0.059687  | -1.415013 |
| 13            | 1             | 0           | 4.795788                | -1.640685 | 0.376902  |
| 14            | 6             | 0           | -1.477507               | 0.213355  | -0.180373 |
| 15            | 6             | 0           | -1.441293               | -1.142821 | -0.527769 |
| 16            | 6             | 0           | -2.674273               | 0.825081  | 0.216451  |
| 17            | 6             | 0           | -2.614207               | -1.887693 | -0.470477 |
| 18            | 1             | 0           | -0.511575               | -1.612096 | -0.835888 |
| 19            | 6             | 0           | -3.837618               | 0.067034  | 0.271502  |
| 20            | 1             | 0           | -2.693594               | 1.878396  | 0.481063  |
| 21            | 6             | 0           | -3.805654               | -1.284528 | -0.070887 |
| 22            | 1             | 0           | -2.596069               | -2.939736 | -0.734408 |
| 23            | 1             | 0           | -4.768182               | 0.530765  | 0.581118  |
| 24            | 1             | 0           | -4.717188               | -1.872143 | -0.026262 |
| 25            | 8             | 0           | -0.125964               | 2.431800  | 0.747039  |
| 26            | 1             | 0           | -0.156543               | 2.164078  | 1.687834  |

0 imaginary frequencies  
 Zero-point Energies= -2098.156363  
 Thermal Energies= -2098.126968  
 Thermal Enthalpies= -2098.126023  
 Thermal Free Energies= -2098.223466

**Table S8.** The Gibbs free energies and thermal Enthalpies of all optimized stationary points in the solvent.

| Gibbs free energies and thermal Enthalpies for all reactants intermediates, transition states, and products at the M062X(D3)/6-31G(d) level with the SMD solvation model and dichloroethane as the solvent. The UM062X functional was used for the radical optimization calculations. 1 hartree=627.51 kcal/mol |                |                |
|-----------------------------------------------------------------------------------------------------------------------------------------------------------------------------------------------------------------------------------------------------------------------------------------------------------------|----------------|----------------|
| Structure                                                                                                                                                                                                                                                                                                       | Gsol (Hartree) | Hsol (Hartree) |
| 1                                                                                                                                                                                                                                                                                                               | -1223.683855   | -1223.615745   |
| 2                                                                                                                                                                                                                                                                                                               | -1122.031198   | -1121.969179   |
| 3                                                                                                                                                                                                                                                                                                               | -2097.686423   | -2097.594454   |
| TsNH.                                                                                                                                                                                                                                                                                                           | -874.48832     | -874.437759    |
| TS1                                                                                                                                                                                                                                                                                                             | -2098.163058   | -2098.067466   |
| IM1                                                                                                                                                                                                                                                                                                             | -2098.19831    | -2098.098948   |
| TS2                                                                                                                                                                                                                                                                                                             | -2098.184437   | -2098.091526   |
| IM2                                                                                                                                                                                                                                                                                                             | -2098.218073   | -2098.124762   |
| TS3                                                                                                                                                                                                                                                                                                             | -2098.202551   | -2098.110254   |
| IM3                                                                                                                                                                                                                                                                                                             | -2098.223466   | -2098.126023   |



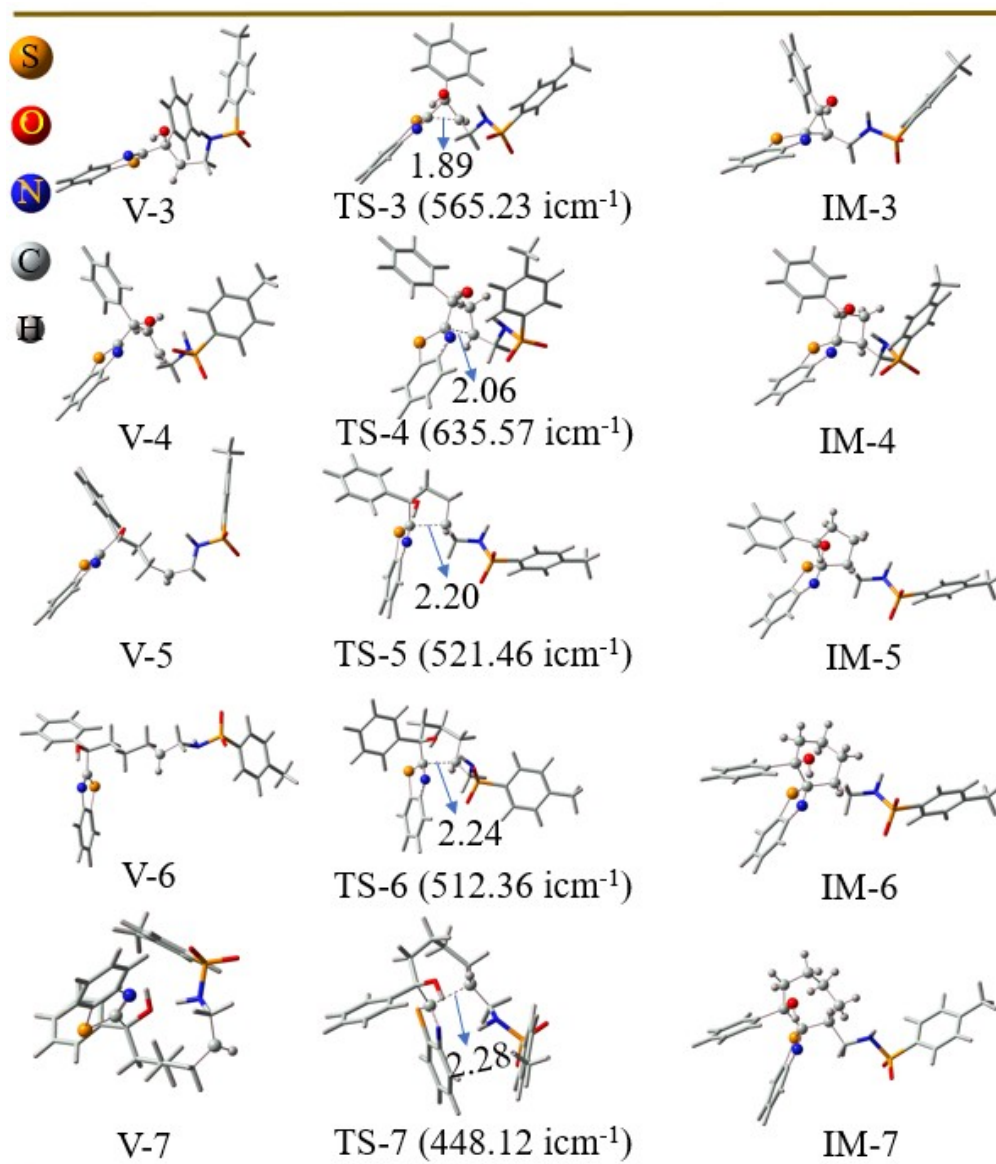

**Figure S7.** Optimized structures of reaction, production, and the transition state at M062X(D3)/6-31g(d) level with the SMD solvation model and dichloroethane as the solvent. UM062X(D3) functional was used for radical structure optimization. The data in brackets is the unique virtual frequency of the transition state. The bond length in Å.

**Table S9.** Standard orientation of All Stationary Points and the only imaginary frequencies of each transition state

|        |        |        |                         |                             |
|--------|--------|--------|-------------------------|-----------------------------|
| 1.     |        |        |                         |                             |
|        |        |        |                         | Charge = 0 Multiplicity = 2 |
| Center | Atomic | Atomic | Coordinates (Angstroms) |                             |

| Number | Number | Type | X         | Y         | Z         |
|--------|--------|------|-----------|-----------|-----------|
| 1      | 6      | 0    | -0.204292 | 0.894298  | -1.779208 |
| 2      | 6      | 0    | -0.384000 | 0.705038  | -0.406634 |
| 3      | 6      | 0    | 0.065241  | 1.678594  | 0.486995  |
| 4      | 6      | 0    | 0.690065  | 2.828772  | 0.010988  |
| 5      | 6      | 0    | 0.868802  | 3.017639  | -1.359157 |
| 6      | 6      | 0    | 0.420024  | 2.047498  | -2.253423 |
| 7      | 1      | 0    | -0.549690 | 0.139133  | -2.481636 |
| 8      | 1      | 0    | -0.072397 | 1.526613  | 1.552119  |
| 9      | 1      | 0    | 1.040404  | 3.579164  | 0.713847  |
| 10     | 1      | 0    | 1.356176  | 3.915372  | -1.727882 |
| 11     | 1      | 0    | 0.557581  | 2.183344  | -3.321890 |
| 12     | 6      | 0    | -1.137671 | -0.518110 | 0.112334  |
| 13     | 8      | 0    | -0.695153 | -0.780498 | 1.444688  |
| 14     | 1      | 0    | -1.428138 | -1.247775 | 1.888740  |
| 15     | 6      | 0    | -0.943182 | -1.746272 | -0.737608 |
| 16     | 1      | 0    | -1.802457 | -2.354503 | -0.995457 |
| 17     | 6      | 0    | 0.413706  | -2.273616 | -1.073693 |
| 18     | 1      | 0    | 0.396177  | -3.371284 | -1.027776 |
| 19     | 1      | 0    | 0.701495  | -2.001728 | -2.098070 |
| 20     | 6      | 0    | -4.961208 | 0.412298  | -0.197056 |
| 21     | 6      | 0    | -4.696418 | -0.362900 | 0.947840  |
| 22     | 6      | 0    | -5.742484 | -0.729104 | 1.802452  |
| 23     | 6      | 0    | -7.027614 | -0.313651 | 1.493352  |
| 24     | 6      | 0    | -7.280930 | 0.460651  | 0.348743  |
| 25     | 6      | 0    | -6.254968 | 0.834261  | -0.508106 |
| 26     | 6      | 0    | -2.631865 | -0.216780 | 0.178086  |
| 27     | 1      | 0    | -5.530552 | -1.326845 | 2.683199  |
| 28     | 1      | 0    | -7.851724 | -0.588835 | 2.143672  |
| 29     | 1      | 0    | -8.296649 | 0.773883  | 0.129050  |
| 30     | 1      | 0    | -6.453740 | 1.433696  | -1.390563 |
| 31     | 7      | 0    | -3.360789 | -0.703207 | 1.121401  |
| 32     | 16     | 0    | -3.466888 | 0.721043  | -1.047171 |
| 33     | 7      | 0    | 1.423478  | -1.693202 | -0.177776 |
| 34     | 1      | 0    | 1.171289  | -1.733587 | 0.811213  |
| 35     | 16     | 0    | 3.007564  | -2.076666 | -0.447219 |
| 36     | 8      | 0    | 3.159251  | -2.154087 | -1.899257 |
| 37     | 8      | 0    | 3.450258  | -3.217568 | 0.354651  |
| 38     | 6      | 0    | 3.823330  | -0.632074 | 0.176140  |
| 39     | 6      | 0    | 3.424922  | 0.623038  | -0.286343 |
| 40     | 6      | 0    | 4.877509  | -0.777520 | 1.069089  |
| 41     | 6      | 0    | 4.104183  | 1.745628  | 0.162839  |
| 42     | 1      | 0    | 2.589202  | 0.715604  | -0.976188 |
| 43     | 6      | 0    | 5.546667  | 0.362776  | 1.509182  |
| 44     | 1      | 0    | 5.163628  | -1.764858 | 1.416569  |
| 45     | 6      | 0    | 5.173158  | 1.632393  | 1.064025  |
| 46     | 1      | 0    | 3.799693  | 2.729630  | -0.185337 |
| 47     | 1      | 0    | 6.370012  | 0.262562  | 2.210780  |
| 48     | 6      | 0    | 5.892334  | 2.866627  | 1.537743  |

|    |   |   |          |          |          |
|----|---|---|----------|----------|----------|
| 49 | 1 | 0 | 6.695319 | 2.615767 | 2.234832 |
| 50 | 1 | 0 | 6.327811 | 3.409850 | 0.692469 |
| 51 | 1 | 0 | 5.200220 | 3.549945 | 2.041033 |

0 imaginary frequencies

Zero-point Energies= -2019.602970

Thermal Energies= -2019.575820

Thermal Enthalpies= -2019.574876

Thermal Free Energies= -2019.664703

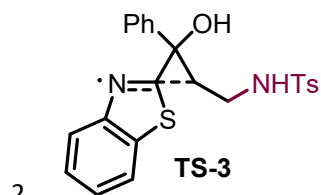

Charge = 0 Multiplicity = 2

| Center Number | Atomic Number | Atomic Type | Coordinates (Angstroms) |           |           |
|---------------|---------------|-------------|-------------------------|-----------|-----------|
|               |               |             | X                       | Y         | Z         |
| 1             | 6             | 0           | -0.281537               | 3.035177  | -0.689318 |
| 2             | 6             | 0           | -1.126172               | 2.380491  | 0.204956  |
| 3             | 6             | 0           | -1.959126               | 3.121830  | 1.047686  |
| 4             | 6             | 0           | -1.955166               | 4.510679  | 0.984138  |
| 5             | 6             | 0           | -1.114288               | 5.165047  | 0.082182  |
| 6             | 6             | 0           | -0.276448               | 4.428220  | -0.750735 |
| 7             | 1             | 0           | 0.377394                | 2.455616  | -1.330804 |
| 8             | 1             | 0           | -2.607324               | 2.604532  | 1.751281  |
| 9             | 1             | 0           | -2.606814               | 5.084284  | 1.636043  |
| 10            | 1             | 0           | -1.113092               | 6.249718  | 0.031639  |
| 11            | 1             | 0           | 0.383475                | 4.935035  | -1.448074 |
| 12            | 6             | 0           | -1.108818               | 0.880235  | 0.328765  |
| 13            | 8             | 0           | -0.475940               | 0.471069  | 1.515597  |
| 14            | 1             | 0           | -0.987824               | -0.283948 | 1.869186  |
| 15            | 6             | 0           | -0.774699               | 0.067876  | -0.871232 |
| 16            | 1             | 0           | -0.931370               | 0.503872  | -1.851758 |
| 17            | 6             | 0           | 0.033323                | -1.180485 | -0.727740 |
| 18            | 1             | 0           | -0.410084               | -1.855313 | 0.015016  |
| 19            | 1             | 0           | 0.098436                | -1.705075 | -1.681760 |
| 20            | 6             | 0           | -4.680127               | -0.638437 | -0.384385 |
| 21            | 6             | 0           | -3.921212               | -1.427539 | 0.513917  |
| 22            | 6             | 0           | -4.485921               | -2.598829 | 1.046297  |
| 23            | 6             | 0           | -5.770874               | -2.954001 | 0.672555  |
| 24            | 6             | 0           | -6.508659               | -2.163525 | -0.224307 |
| 25            | 6             | 0           | -5.971620               | -0.999167 | -0.761544 |
| 26            | 6             | 0           | -2.399159               | 0.139485  | 0.099449  |
| 27            | 1             | 0           | -3.904119               | -3.202735 | 1.735292  |
| 28            | 1             | 0           | -6.215479               | -3.858172 | 1.076143  |
| 29            | 1             | 0           | -7.513764               | -2.463405 | -0.503013 |
| 30            | 1             | 0           | -6.543877               | -0.389026 | -1.452954 |

|    |    |   |           |           |           |
|----|----|---|-----------|-----------|-----------|
| 31 | 7  | 0 | -2.664745 | -0.960187 | 0.799009  |
| 32 | 16 | 0 | -3.758823 | 0.770954  | -0.859626 |
| 33 | 7  | 0 | 1.406068  | -0.768515 | -0.337908 |
| 34 | 1  | 0 | 1.379987  | -0.317131 | 0.582347  |
| 35 | 16 | 0 | 2.520622  | -2.013254 | -0.318263 |
| 36 | 8  | 0 | 2.483991  | -2.607724 | -1.652429 |
| 37 | 8  | 0 | 2.341095  | -2.895197 | 0.835937  |
| 38 | 6  | 0 | 4.022670  | -1.103905 | -0.094355 |
| 39 | 6  | 0 | 4.448303  | -0.243797 | -1.108013 |
| 40 | 6  | 0 | 4.759204  | -1.280090 | 1.070031  |
| 41 | 6  | 0 | 5.634595  | 0.452856  | -0.936232 |
| 42 | 1  | 0 | 3.857165  | -0.124475 | -2.011215 |
| 43 | 6  | 0 | 5.949624  | -0.571909 | 1.222636  |
| 44 | 1  | 0 | 4.407068  | -1.959242 | 1.839576  |
| 45 | 6  | 0 | 6.400844  | 0.299035  | 0.229197  |
| 46 | 1  | 0 | 5.979378  | 1.126944  | -1.715855 |
| 47 | 1  | 0 | 6.535775  | -0.700727 | 2.128034  |
| 48 | 6  | 0 | 7.684482  | 1.067288  | 0.391891  |
| 49 | 1  | 0 | 7.494143  | 2.145737  | 0.379736  |
| 50 | 1  | 0 | 8.180836  | 0.817058  | 1.332508  |
| 51 | 1  | 0 | 8.373550  | 0.849746  | -0.430721 |

-----  
 1 imaginary frequencies (-565.23)

Zero-point Energies= -2019.583534  
 Thermal Energies= -2019.557148  
 Thermal Enthalpies= -2019.556204  
 Thermal Free Energies= -2019.644902

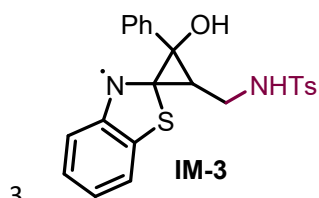

Charge = 0 Multiplicity = 2

| Center Number | Atomic Number | Atomic Type | Coordinates (Angstroms) |          |           |
|---------------|---------------|-------------|-------------------------|----------|-----------|
|               |               |             | X                       | Y        | Z         |
| 1             | 6             | 0           | -1.092624               | 2.881264 | -0.979318 |
| 2             | 6             | 0           | -1.119244               | 2.190314 | 0.236813  |
| 3             | 6             | 0           | -1.259192               | 2.914558 | 1.426173  |
| 4             | 6             | 0           | -1.372134               | 4.300973 | 1.398289  |
| 5             | 6             | 0           | -1.351822               | 4.983565 | 0.183311  |
| 6             | 6             | 0           | -1.211969               | 4.268438 | -1.003897 |
| 7             | 1             | 0           | -0.967153               | 2.350514 | -1.918447 |
| 8             | 1             | 0           | -1.270719               | 2.382041 | 2.370727  |
| 9             | 1             | 0           | -1.476979               | 4.849026 | 2.329851  |
| 10            | 1             | 0           | -1.440911               | 6.065369 | 0.161885  |
| 11            | 1             | 0           | -1.186889               | 4.789971 | -1.955781 |
| 12            | 6             | 0           | -1.037794               | 0.703471 | 0.312553  |

|    |    |   |           |           |           |
|----|----|---|-----------|-----------|-----------|
| 13 | 8  | 0 | -0.568095 | 0.238110  | 1.538092  |
| 14 | 1  | 0 | -1.140095 | -0.507581 | 1.809062  |
| 15 | 6  | 0 | -0.779113 | -0.170709 | -0.870036 |
| 16 | 1  | 0 | -0.684703 | 0.320896  | -1.834110 |
| 17 | 6  | 0 | 0.110060  | -1.378908 | -0.679092 |
| 18 | 1  | 0 | -0.292788 | -2.045769 | 0.088884  |
| 19 | 1  | 0 | 0.191254  | -1.934288 | -1.615265 |
| 20 | 6  | 0 | -4.653583 | -0.556742 | -0.440521 |
| 21 | 6  | 0 | -3.934052 | -1.406903 | 0.454702  |
| 22 | 6  | 0 | -4.647196 | -2.376641 | 1.202085  |
| 23 | 6  | 0 | -6.012845 | -2.478367 | 1.041085  |
| 24 | 6  | 0 | -6.703214 | -1.630892 | 0.151578  |
| 25 | 6  | 0 | -6.031781 | -0.664728 | -0.591482 |
| 26 | 6  | 0 | -2.193871 | -0.183227 | -0.298502 |
| 27 | 1  | 0 | -4.099872 | -3.020807 | 1.882617  |
| 28 | 1  | 0 | -6.567549 | -3.220275 | 1.606512  |
| 29 | 1  | 0 | -7.778413 | -1.731137 | 0.043939  |
| 30 | 1  | 0 | -6.571316 | -0.012967 | -1.271022 |
| 31 | 7  | 0 | -2.606393 | -1.221268 | 0.525365  |
| 32 | 16 | 0 | -3.567174 | 0.557636  | -1.225035 |
| 33 | 7  | 0 | 1.451054  | -0.875391 | -0.321792 |
| 34 | 1  | 0 | 1.418326  | -0.431401 | 0.601652  |
| 35 | 16 | 0 | 2.656293  | -2.030642 | -0.338799 |
| 36 | 8  | 0 | 2.656100  | -2.595201 | -1.686301 |
| 37 | 8  | 0 | 2.553535  | -2.950856 | 0.794611  |
| 38 | 6  | 0 | 4.084169  | -1.012455 | -0.100405 |
| 39 | 6  | 0 | 4.444721  | -0.109373 | -1.101778 |
| 40 | 6  | 0 | 4.827446  | -1.144038 | 1.065617  |
| 41 | 6  | 0 | 5.571508  | 0.676768  | -0.915597 |
| 42 | 1  | 0 | 3.849501  | -0.026528 | -2.006291 |
| 43 | 6  | 0 | 5.957257  | -0.345800 | 1.232912  |
| 44 | 1  | 0 | 4.526698  | -1.857811 | 1.825534  |
| 45 | 6  | 0 | 6.342099  | 0.570425  | 0.252230  |
| 46 | 1  | 0 | 5.864820  | 1.385652  | -1.685335 |
| 47 | 1  | 0 | 6.547460  | -0.438064 | 2.140132  |
| 48 | 6  | 0 | 7.560331  | 1.435642  | 0.430411  |
| 49 | 1  | 0 | 8.055423  | 1.233716  | 1.383174  |
| 50 | 1  | 0 | 8.280397  | 1.261579  | -0.375979 |
| 51 | 1  | 0 | 7.289714  | 2.496337  | 0.400610  |

-----  
0 imaginary frequencies

Zero-point Energies= -2019.596395  
Thermal Energies= -2019.569793  
Thermal Enthalpies= -2019.568849  
Thermal Free Energies= -2019.658512

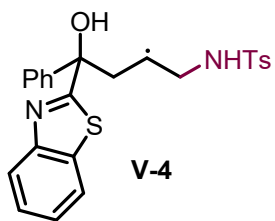

4. Charge = 0 Multiplicity = 2

| Center Number | Atomic Number | Atomic Type | Coordinates (Angstroms) |           |           |
|---------------|---------------|-------------|-------------------------|-----------|-----------|
|               |               |             | X                       | Y         | Z         |
| 1             | 6             | 0           | 2.595026                | 3.196762  | 0.814580  |
| 2             | 6             | 0           | 1.603637                | 2.525665  | 0.090960  |
| 3             | 6             | 0           | 1.097824                | 3.116245  | -1.068177 |
| 4             | 6             | 0           | 1.566147                | 4.358482  | -1.491570 |
| 5             | 6             | 0           | 2.549052                | 5.024387  | -0.764125 |
| 6             | 6             | 0           | 3.063278                | 4.437725  | 0.390273  |
| 7             | 1             | 0           | 3.016410                | 2.762761  | 1.717331  |
| 8             | 1             | 0           | 0.328735                | 2.600298  | -1.631084 |
| 9             | 1             | 0           | 1.158773                | 4.805394  | -2.393624 |
| 10            | 1             | 0           | 2.913059                | 5.992891  | -1.093382 |
| 11            | 1             | 0           | 3.831364                | 4.945264  | 0.965955  |
| 12            | 6             | 0           | 1.085589                | 1.143424  | 0.520910  |
| 13            | 8             | 0           | -0.096383               | 0.843688  | -0.193070 |
| 14            | 1             | 0           | 0.050194                | 0.064783  | -0.767612 |
| 15            | 6             | 0           | 0.744024                | 1.114819  | 2.027653  |
| 16            | 1             | 0           | 1.568519                | 1.536739  | 2.611518  |
| 17            | 1             | 0           | -0.092601               | 1.823573  | 2.147491  |
| 18            | 6             | 0           | 0.403664                | -0.230116 | 2.595850  |
| 19            | 1             | 0           | 0.553591                | -0.363231 | 3.660964  |
| 20            | 6             | 0           | -0.341554               | -1.291971 | 1.858128  |
| 21            | 1             | 0           | 0.214964                | -1.597852 | 0.959828  |
| 22            | 1             | 0           | -0.470648               | -2.172620 | 2.489222  |
| 23            | 6             | 0           | 4.054499                | -1.411605 | 0.001498  |
| 24            | 6             | 0           | 3.022982                | -1.600600 | -0.936796 |
| 25            | 6             | 0           | 3.127447                | -2.612087 | -1.897625 |
| 26            | 6             | 0           | 4.260583                | -3.409859 | -1.899154 |
| 27            | 6             | 0           | 5.284692                | -3.211988 | -0.958342 |
| 28            | 6             | 0           | 5.196483                | -2.213334 | 0.002167  |
| 29            | 6             | 0           | 2.133375                | 0.094348  | 0.170087  |
| 30            | 1             | 0           | 2.325848                | -2.752837 | -2.615522 |
| 31            | 1             | 0           | 4.359484                | -4.200071 | -2.636438 |
| 32            | 1             | 0           | 6.161804                | -3.851002 | -0.979719 |
| 33            | 1             | 0           | 5.988290                | -2.063620 | 0.728745  |
| 34            | 7             | 0           | 1.951685                | -0.726747 | -0.805363 |
| 35            | 16            | 0           | 3.632325                | -0.091381 | 1.064956  |
| 36            | 7             | 0           | -1.704805               | -0.809742 | 1.470769  |
| 37            | 1             | 0           | -1.612271               | 0.153126  | 1.128792  |
| 38            | 16            | 0           | -2.320183               | -1.684456 | 0.181501  |
| 39            | 8             | 0           | -2.596728               | -3.033163 | 0.667033  |
| 40            | 8             | 0           | -1.463437               | -1.544156 | -1.003938 |

|    |   |   |           |           |           |
|----|---|---|-----------|-----------|-----------|
| 41 | 6 | 0 | -3.831956 | -0.819768 | -0.125466 |
| 42 | 6 | 0 | -4.988260 | -1.213819 | 0.545210  |
| 43 | 6 | 0 | -3.827912 | 0.250582  | -1.014186 |
| 44 | 6 | 0 | -6.163381 | -0.512535 | 0.312336  |
| 45 | 1 | 0 | -4.963509 | -2.057429 | 1.228060  |
| 46 | 6 | 0 | -5.015777 | 0.943140  | -1.229664 |
| 47 | 1 | 0 | -2.913929 | 0.532675  | -1.528493 |
| 48 | 6 | 0 | -6.193475 | 0.573010  | -0.573877 |
| 49 | 1 | 0 | -7.075595 | -0.809250 | 0.823237  |
| 50 | 1 | 0 | -5.029225 | 1.780789  | -1.921131 |
| 51 | 6 | 0 | -7.480553 | 1.315655  | -0.811869 |
| 52 | 1 | 0 | -7.333874 | 2.155111  | -1.495462 |
| 53 | 1 | 0 | -8.236823 | 0.650457  | -1.241889 |
| 54 | 1 | 0 | -7.885213 | 1.702550  | 0.129020  |

-----  
 0 imaginary frequencies

Zero-point Energies= -2058.868911  
 Thermal Energies= -2058.841770  
 Thermal Enthalpies= -2058.840826  
 Thermal Free Energies= -2058.93025

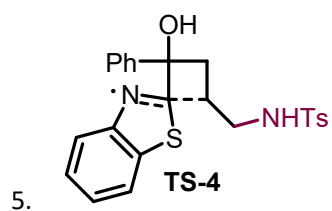

| Center Number | Atomic Number | Atomic Type | Coordinates (Angstroms) |           |           |
|---------------|---------------|-------------|-------------------------|-----------|-----------|
|               |               |             | X                       | Y         | Z         |
| 1             | 6             | 0           | 2.613086                | 3.386761  | 1.091214  |
| 2             | 6             | 0           | 2.253789                | 2.319252  | 0.269038  |
| 3             | 6             | 0           | 2.737636                | 2.273183  | -1.043258 |
| 4             | 6             | 0           | 3.577206                | 3.273738  | -1.521159 |
| 5             | 6             | 0           | 3.939980                | 4.334569  | -0.691042 |
| 6             | 6             | 0           | 3.455005                | 4.390384  | 0.612709  |
| 7             | 1             | 0           | 2.233173                | 3.446326  | 2.107103  |
| 8             | 1             | 0           | 2.458348                | 1.445357  | -1.693083 |
| 9             | 1             | 0           | 3.950718                | 3.224509  | -2.539399 |
| 10            | 1             | 0           | 4.598436                | 5.114475  | -1.061325 |
| 11            | 1             | 0           | 3.729769                | 5.216198  | 1.261870  |
| 12            | 6             | 0           | 1.267381                | 1.260840  | 0.728868  |
| 13            | 8             | 0           | -0.010088               | 1.530712  | 0.166011  |
| 14            | 1             | 0           | 0.034573                | 1.306101  | -0.782386 |
| 15            | 6             | 0           | 1.066647                | 1.059297  | 2.241329  |
| 16            | 1             | 0           | 1.938419                | 1.394302  | 2.807282  |
| 17            | 1             | 0           | 0.177318                | 1.583555  | 2.604449  |
| 18            | 6             | 0           | 0.976261                | -0.454299 | 2.274886  |
| 19            | 1             | 0           | 1.770825                | -0.983264 | 2.794921  |

|    |    |   |           |           |           |
|----|----|---|-----------|-----------|-----------|
| 20 | 6  | 0 | -0.308710 | -1.221517 | 2.273440  |
| 21 | 1  | 0 | -0.136833 | -2.176400 | 1.754102  |
| 22 | 1  | 0 | -0.593408 | -1.457139 | 3.307955  |
| 23 | 6  | 0 | 2.906977  | -2.143269 | -0.518767 |
| 24 | 6  | 0 | 1.553333  | -2.026813 | -0.914392 |
| 25 | 6  | 0 | 0.971538  | -3.039931 | -1.693499 |
| 26 | 6  | 0 | 1.743250  | -4.129590 | -2.061368 |
| 27 | 6  | 0 | 3.087237  | -4.229655 | -1.665082 |
| 28 | 6  | 0 | 3.681545  | -3.241346 | -0.888757 |
| 29 | 6  | 0 | 1.654659  | -0.196585 | 0.351984  |
| 30 | 1  | 0 | -0.072130 | -2.955084 | -1.979570 |
| 31 | 1  | 0 | 1.303161  | -4.921300 | -2.659396 |
| 32 | 1  | 0 | 3.672038  | -5.093445 | -1.965042 |
| 33 | 1  | 0 | 4.718995  | -3.323698 | -0.580750 |
| 34 | 7  | 0 | 0.906659  | -0.889913 | -0.493113 |
| 35 | 16 | 0 | 3.367362  | -0.746405 | 0.423466  |
| 36 | 7  | 0 | -1.401206 | -0.458887 | 1.652557  |
| 37 | 1  | 0 | -1.053878 | 0.111073  | 0.870090  |
| 38 | 16 | 0 | -2.673273 | -1.392022 | 1.114610  |
| 39 | 8  | 0 | -3.515761 | -1.719150 | 2.263076  |
| 40 | 8  | 0 | -2.206664 | -2.504478 | 0.283033  |
| 41 | 6  | 0 | -3.490871 | -0.211935 | 0.078083  |
| 42 | 6  | 0 | -4.634944 | 0.430677  | 0.538954  |
| 43 | 6  | 0 | -2.951334 | 0.060720  | -1.177481 |
| 44 | 6  | 0 | -5.249868 | 1.367946  | -0.283786 |
| 45 | 1  | 0 | -5.031176 | 0.197618  | 1.522204  |
| 46 | 6  | 0 | -3.576357 | 1.007093  | -1.981129 |
| 47 | 1  | 0 | -2.057139 | -0.456710 | -1.516779 |
| 48 | 6  | 0 | -4.731837 | 1.668394  | -1.548707 |
| 49 | 1  | 0 | -6.145077 | 1.878335  | 0.061068  |
| 50 | 1  | 0 | -3.165637 | 1.234288  | -2.960913 |
| 51 | 6  | 0 | -5.422677 | 2.669315  | -2.435037 |
| 52 | 1  | 0 | -4.750886 | 3.038638  | -3.213849 |
| 53 | 1  | 0 | -6.287910 | 2.211194  | -2.927630 |
| 54 | 1  | 0 | -5.788817 | 3.521472  | -1.855429 |

-----  
 1 imaginary frequencies (-635.57)

Zero-point Energies= -2058.843415 3

Thermal Energies= -2058.817016

Thermal Enthalpies= -2058.816072

Thermal Free Energies= -2058.902349

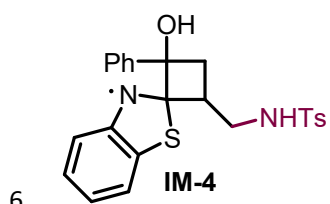

Charge = 0 Multiplicity = 2

-----  
 Center Atomic Atomic Coordinates (Angstroms)



| Number | Number | Type | X         | Y         | Z         |
|--------|--------|------|-----------|-----------|-----------|
| 1      | 6      | 0    | -2.460012 | 3.523181  | -0.693985 |
| 2      | 6      | 0    | -2.221730 | 2.327391  | -0.020102 |
| 3      | 6      | 0    | -2.924607 | 2.056429  | 1.160204  |
| 4      | 6      | 0    | -3.854013 | 2.963846  | 1.653627  |
| 5      | 6      | 0    | -4.089575 | 4.159794  | 0.972573  |
| 6      | 6      | 0    | -3.391320 | 4.437409  | -0.198233 |
| 7      | 1      | 0    | -1.915663 | 3.753509  | -1.605302 |
| 8      | 1      | 0    | -2.749814 | 1.120605  | 1.689985  |
| 9      | 1      | 0    | -4.397619 | 2.739312  | 2.566358  |
| 10     | 1      | 0    | -4.816325 | 4.869770  | 1.355648  |
| 11     | 1      | 0    | -3.567473 | 5.367299  | -0.730613 |
| 12     | 6      | 0    | -1.180411 | 1.338375  | -0.485155 |
| 13     | 8      | 0    | -0.084796 | 1.327102  | 0.416097  |
| 14     | 1      | 0    | -0.386077 | 0.892984  | 1.235582  |
| 15     | 6      | 0    | -0.614437 | 1.396345  | -1.915143 |
| 16     | 1      | 0    | -1.265830 | 1.927886  | -2.611274 |
| 17     | 1      | 0    | 0.397803  | 1.802923  | -1.971311 |
| 18     | 6      | 0    | -0.760220 | -0.137511 | -2.057439 |
| 19     | 1      | 0    | -1.340068 | -0.442726 | -2.930807 |
| 20     | 6      | 0    | 0.490022  | -1.006536 | -2.039841 |
| 21     | 1      | 0    | 0.188728  | -2.029411 | -1.777346 |
| 22     | 1      | 0    | 0.926172  | -1.025050 | -3.041598 |
| 23     | 6      | 0    | -3.532751 | -1.678000 | 0.027565  |
| 24     | 6      | 0    | -2.254826 | -1.875264 | 0.654430  |
| 25     | 6      | 0    | -2.125682 | -2.886395 | 1.648017  |
| 26     | 6      | 0    | -3.222847 | -3.646054 | 1.981817  |
| 27     | 6      | 0    | -4.470098 | -3.431741 | 1.354617  |
| 28     | 6      | 0    | -4.632888 | -2.451536 | 0.379581  |
| 29     | 6      | 0    | -1.637041 | -0.171875 | -0.748753 |
| 30     | 1      | 0    | -1.156500 | -3.035441 | 2.113065  |
| 31     | 1      | 0    | -3.134473 | -4.421720 | 2.735621  |
| 32     | 1      | 0    | -5.320581 | -4.043479 | 1.637858  |
| 33     | 1      | 0    | -5.596806 | -2.297355 | -0.094218 |
| 34     | 7      | 0    | -1.260072 | -1.081242 | 0.268273  |
| 35     | 16     | 0    | -3.441482 | -0.401079 | -1.143513 |
| 36     | 7      | 0    | 1.512831  | -0.480021 | -1.118953 |
| 37     | 1      | 0    | 1.104548  | -0.070965 | -0.270322 |
| 38     | 16     | 0    | 2.710793  | -1.558366 | -0.733949 |
| 39     | 8      | 0    | 3.209565  | -2.082093 | -2.004796 |
| 40     | 8      | 0    | 2.293237  | -2.523234 | 0.285446  |
| 41     | 6      | 0    | 3.908563  | -0.476993 | -0.001634 |
| 42     | 6      | 0    | 4.482969  | 0.524974  | -0.785560 |
| 43     | 6      | 0    | 4.274757  | -0.660985 | 1.325284  |
| 44     | 6      | 0    | 5.435705  | 1.355514  | -0.215747 |
| 45     | 1      | 0    | 4.181872  | 0.651078  | -1.821345 |
| 46     | 6      | 0    | 5.234562  | 0.183649  | 1.880255  |
| 47     | 1      | 0    | 3.814706  | -1.450212 | 1.910717  |
| 48     | 6      | 0    | 5.824108  | 1.197495  | 1.123320  |

|    |   |   |          |          |           |
|----|---|---|----------|----------|-----------|
| 49 | 1 | 0 | 5.890054 | 2.141362 | -0.813416 |
| 50 | 1 | 0 | 5.528276 | 0.050902 | 2.917679  |
| 51 | 6 | 0 | 6.857552 | 2.114212 | 1.720273  |
| 52 | 1 | 0 | 7.071436 | 1.849257 | 2.758422  |
| 53 | 1 | 0 | 7.792623 | 2.067129 | 1.152487  |
| 54 | 1 | 0 | 6.514002 | 3.153767 | 1.694470  |

-----  
0 imaginary frequencies

Zero-point Energies= -2058.863147

Thermal Energies= -2058.835639

Thermal Enthalpies= -2058.834694

Thermal Free Energies= -2058.927275

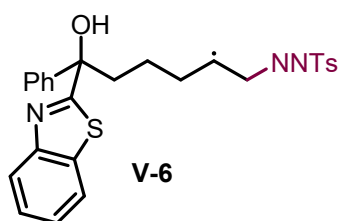

7.

Charge = 0 Multiplicity = 2

| Center Number | Atomic Number | Atomic Type | Coordinates (Angstroms) |           |           |
|---------------|---------------|-------------|-------------------------|-----------|-----------|
|               |               |             | X                       | Y         | Z         |
| 1             | 6             | 0           | -3.918352               | 2.644989  | -1.623323 |
| 2             | 6             | 0           | -4.357302               | 2.034807  | -0.448108 |
| 3             | 6             | 0           | -5.709490               | 2.124270  | -0.099154 |
| 4             | 6             | 0           | -6.605294               | 2.812538  | -0.908561 |
| 5             | 6             | 0           | -6.160956               | 3.422373  | -2.082766 |
| 6             | 6             | 0           | -4.818510               | 3.336917  | -2.436074 |
| 7             | 1             | 0           | -2.874768               | 2.597074  | -1.916578 |
| 8             | 1             | 0           | -6.047069               | 1.653999  | 0.819665  |
| 9             | 1             | 0           | -7.651494               | 2.875128  | -0.624159 |
| 10            | 1             | 0           | -6.859161               | 3.961585  | -2.715855 |
| 11            | 1             | 0           | -4.462093               | 3.811400  | -3.345439 |
| 12            | 6             | 0           | -3.435851               | 1.224732  | 0.467358  |
| 13            | 8             | 0           | -3.764504               | 1.543211  | 1.804883  |
| 14            | 1             | 0           | -3.785896               | 0.706570  | 2.305244  |
| 15            | 6             | 0           | -1.937339               | 1.497013  | 0.226551  |
| 16            | 1             | 0           | -1.669663               | 1.242551  | -0.806050 |
| 17            | 1             | 0           | -1.782887               | 2.576351  | 0.347942  |
| 18            | 6             | 0           | 1.350364                | 0.328454  | 1.893343  |
| 19            | 1             | 0           | 1.135476                | -0.721870 | 2.072076  |
| 20            | 6             | 0           | 2.717455                | 0.823368  | 2.212340  |
| 21            | 1             | 0           | 2.703404                | 1.905723  | 2.398618  |
| 22            | 1             | 0           | 3.126464                | 0.320905  | 3.091670  |
| 23            | 6             | 0           | -3.963062               | -2.545783 | -0.575626 |
| 24            | 6             | 0           | -4.116123               | -2.359482 | 0.811145  |
| 25            | 6             | 0           | -4.396698               | -3.453394 | 1.636900  |
| 26            | 6             | 0           | -4.517620               | -4.707443 | 1.059204  |

|    |    |   |           |           |           |
|----|----|---|-----------|-----------|-----------|
| 27 | 6  | 0 | -4.363920 | -4.882040 | -0.325797 |
| 28 | 6  | 0 | -4.086503 | -3.806993 | -1.159674 |
| 29 | 6  | 0 | -3.711049 | -0.258365 | 0.253989  |
| 30 | 1  | 0 | -4.512767 | -3.302104 | 2.705359  |
| 31 | 1  | 0 | -4.734566 | -5.567653 | 1.684356  |
| 32 | 1  | 0 | -4.463801 | -5.874206 | -0.754379 |
| 33 | 1  | 0 | -3.969173 | -3.945221 | -2.229560 |
| 34 | 7  | 0 | -3.962298 | -1.046724 | 1.241226  |
| 35 | 16 | 0 | -3.631618 | -1.005803 | -1.332848 |
| 36 | 7  | 0 | 3.632613  | 0.499692  | 1.075444  |
| 37 | 1  | 0 | 3.298868  | 0.924560  | 0.206113  |
| 38 | 16 | 0 | 5.221852  | 0.955364  | 1.314910  |
| 39 | 8  | 0 | 5.631788  | 0.336085  | 2.573108  |
| 40 | 8  | 0 | 5.412860  | 2.398750  | 1.159827  |
| 41 | 6  | 0 | 6.012927  | 0.145886  | -0.047414 |
| 42 | 6  | 0 | 6.043741  | -1.249311 | -0.077820 |
| 43 | 6  | 0 | 6.605660  | 0.909636  | -1.044703 |
| 44 | 6  | 0 | 6.679189  | -1.879398 | -1.136875 |
| 45 | 1  | 0 | 5.575794  | -1.825754 | 0.714675  |
| 46 | 6  | 0 | 7.240348  | 0.257551  | -2.100149 |
| 47 | 1  | 0 | 6.572014  | 1.992956  | -0.992589 |
| 48 | 6  | 0 | 7.285830  | -1.136452 | -2.161044 |
| 49 | 1  | 0 | 6.711270  | -2.965061 | -1.175011 |
| 50 | 1  | 0 | 7.708888  | 0.842726  | -2.886305 |
| 51 | 6  | 0 | 7.972457  | -1.843412 | -3.298176 |
| 52 | 1  | 0 | 8.391940  | -1.131321 | -4.012741 |
| 53 | 1  | 0 | 8.784514  | -2.476982 | -2.926254 |
| 54 | 1  | 0 | 7.270889  | -2.494090 | -3.830713 |
| 55 | 6  | 0 | -1.030479 | 0.729294  | 1.183940  |
| 56 | 1  | 0 | -1.147085 | -0.351939 | 1.029645  |
| 57 | 1  | 0 | -1.327348 | 0.937942  | 2.217755  |
| 58 | 6  | 0 | 0.442857  | 1.099474  | 0.995086  |
| 59 | 1  | 0 | 0.714127  | 0.926938  | -0.062753 |
| 60 | 1  | 0 | 0.583363  | 2.176309  | 1.165488  |

-----

0 imaginary frequencies

Zero-point Energies= -2137.395095

Thermal Energies= -2137.363657

Thermal Enthalpies= -2137.362713

Thermal Free Energies= -2137.466705

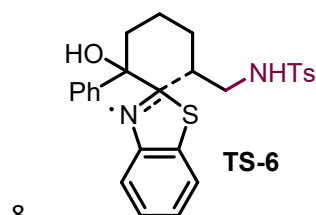

Charge = 0 Multiplicity = 2

-----

| Center | Atomic | Atomic | Coordinates (Angstroms) |
|--------|--------|--------|-------------------------|
|--------|--------|--------|-------------------------|

| Number | Number | Type | X         | Y         | Z         |
|--------|--------|------|-----------|-----------|-----------|
| 1      | 6      | 0    | -4.980693 | -0.107933 | -0.293964 |
| 2      | 6      | 0    | -4.232517 | -1.280354 | -0.173659 |
| 3      | 6      | 0    | -4.829196 | -2.495889 | -0.533503 |
| 4      | 6      | 0    | -6.144926 | -2.541102 | -0.981005 |
| 5      | 6      | 0    | -6.889148 | -1.366054 | -1.084839 |
| 6      | 6      | 0    | -6.300685 | -0.152425 | -0.745199 |
| 7      | 1      | 0    | -4.546428 | 0.856121  | -0.050702 |
| 8      | 1      | 0    | -4.245608 | -3.410239 | -0.478450 |
| 9      | 1      | 0    | -6.587887 | -3.494055 | -1.255195 |
| 10     | 1      | 0    | -7.916017 | -1.397556 | -1.436353 |
| 11     | 1      | 0    | -6.864072 | 0.771620  | -0.834621 |
| 12     | 6      | 0    | -2.776754 | -1.342898 | 0.322682  |
| 13     | 8      | 0    | -2.022589 | -2.094646 | -0.616527 |
| 14     | 1      | 0    | -2.001879 | -1.568359 | -1.436946 |
| 15     | 6      | 0    | -2.725614 | -2.101943 | 1.661427  |
| 16     | 1      | 0    | -3.563988 | -1.767567 | 2.282513  |
| 17     | 1      | 0    | -2.924092 | -3.149088 | 1.409526  |
| 18     | 6      | 0    | -0.071822 | -0.569195 | 0.888354  |
| 19     | 1      | 0    | 0.109652  | 0.289368  | 1.535205  |
| 20     | 6      | 0    | 0.679298  | -0.508231 | -0.409144 |
| 21     | 1      | 0    | 0.348773  | -1.300904 | -1.089197 |
| 22     | 1      | 0    | 0.538663  | 0.460329  | -0.893805 |
| 23     | 6      | 0    | -2.095792 | 2.487595  | 0.845770  |
| 24     | 6      | 0    | -1.817127 | 2.068051  | -0.477084 |
| 25     | 6      | 0    | -1.447942 | 3.020882  | -1.441212 |
| 26     | 6      | 0    | -1.366249 | 4.352490  | -1.070976 |
| 27     | 6      | 0    | -1.644588 | 4.754782  | 0.246319  |
| 28     | 6      | 0    | -2.008282 | 3.829181  | 1.216791  |
| 29     | 6      | 0    | -2.156952 | 0.053013  | 0.410946  |
| 30     | 1      | 0    | -1.231108 | 2.694860  | -2.453680 |
| 31     | 1      | 0    | -1.078696 | 5.097133  | -1.806431 |
| 32     | 1      | 0    | -1.573095 | 5.804534  | 0.512779  |
| 33     | 1      | 0    | -2.219012 | 4.142451  | 2.234279  |
| 34     | 7      | 0    | -1.943982 | 0.720242  | -0.709457 |
| 35     | 16     | 0    | -2.523038 | 1.106177  | 1.822460  |
| 36     | 7      | 0    | 2.127143  | -0.631995 | -0.098347 |
| 37     | 1      | 0    | 2.360036  | -1.570962 | 0.235787  |
| 38     | 16     | 0    | 3.143596  | -0.251472 | -1.370453 |
| 39     | 8      | 0    | 2.811085  | 1.116103  | -1.761318 |
| 40     | 8      | 0    | 3.140287  | -1.285347 | -2.406880 |
| 41     | 6      | 0    | 4.713833  | -0.289811 | -0.553187 |
| 42     | 6      | 0    | 4.985480  | 0.658864  | 0.433937  |
| 43     | 6      | 0    | 5.649364  | -1.249052 | -0.920096 |
| 44     | 6      | 0    | 6.220852  | 0.630703  | 1.063157  |
| 45     | 1      | 0    | 4.238888  | 1.400100  | 0.703247  |
| 46     | 6      | 0    | 6.885497  | -1.259324 | -0.277181 |
| 47     | 1      | 0    | 5.412819  | -1.971986 | -1.693934 |
| 48     | 6      | 0    | 7.186897  | -0.326317 | 0.716936  |

|    |   |   |           |           |           |
|----|---|---|-----------|-----------|-----------|
| 49 | 1 | 0 | 6.446518  | 1.360594  | 1.836051  |
| 50 | 1 | 0 | 7.625825  | -2.004455 | -0.554012 |
| 51 | 6 | 0 | 8.524794  | -0.328335 | 1.405806  |
| 52 | 1 | 0 | 9.119048  | -1.198834 | 1.117974  |
| 53 | 1 | 0 | 9.091768  | 0.572753  | 1.147635  |
| 54 | 1 | 0 | 8.403121  | -0.335090 | 2.493577  |
| 55 | 6 | 0 | -1.419228 | -2.000267 | 2.464057  |
| 56 | 1 | 0 | -1.344812 | -2.880795 | 3.109599  |
| 57 | 1 | 0 | -1.449069 | -1.132770 | 3.133587  |
| 58 | 6 | 0 | -0.166297 | -1.893023 | 1.590845  |
| 59 | 1 | 0 | 0.719311  | -2.002381 | 2.236744  |
| 60 | 1 | 0 | -0.143192 | -2.707144 | 0.859273  |

-----  
 1 imaginary frequencies (-512.36)

Zero-point Energies= -2137.380202

Thermal Energies= -2137.350632

Thermal Enthalpies= -2137.349688

Thermal Free Energies= -2137.444899

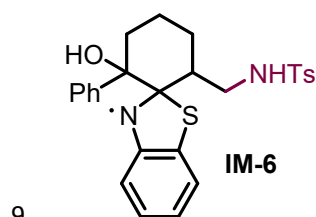

Charge = 0 Multiplicity = 2

-----

| Center Number | Atomic Number | Atomic Type | Coordinates (Angstroms) |           |           |
|---------------|---------------|-------------|-------------------------|-----------|-----------|
|               |               |             | X                       | Y         | Z         |
| 1             | 6             | 0           | -4.688188               | -1.351462 | 0.629403  |
| 2             | 6             | 0           | -3.708487               | -1.412692 | -0.369384 |
| 3             | 6             | 0           | -4.111661               | -1.202794 | -1.693108 |
| 4             | 6             | 0           | -5.438911               | -0.922367 | -2.008244 |
| 5             | 6             | 0           | -6.398645               | -0.848049 | -1.002373 |
| 6             | 6             | 0           | -6.016728               | -1.068664 | 0.317808  |
| 7             | 1             | 0           | -4.424107               | -1.515380 | 1.668265  |
| 8             | 1             | 0           | -3.391003               | -1.271216 | -2.500531 |
| 9             | 1             | 0           | -5.720077               | -0.764340 | -3.045237 |
| 10            | 1             | 0           | -7.433828               | -0.627858 | -1.245235 |
| 11            | 1             | 0           | -6.753334               | -1.024587 | 1.114605  |
| 12            | 6             | 0           | -2.227000               | -1.667522 | -0.052532 |
| 13            | 8             | 0           | -1.536437               | -2.061844 | -1.229641 |
| 14            | 1             | 0           | -1.489124               | -1.277673 | -1.806006 |
| 15            | 6             | 0           | -2.027365               | -2.806412 | 0.961786  |
| 16            | 1             | 0           | -2.883564               | -2.873121 | 1.635698  |
| 17            | 1             | 0           | -2.018667               | -3.725434 | 0.365608  |
| 18            | 6             | 0           | 0.048336                | -0.588571 | 0.599319  |
| 19            | 1             | 0           | 0.365715                | 0.050034  | 1.429860  |
| 20            | 6             | 0           | 0.856208                | -0.123286 | -0.616733 |

|    |    |   |           |           |           |
|----|----|---|-----------|-----------|-----------|
| 21 | 1  | 0 | 0.592789  | -0.698728 | -1.511502 |
| 22 | 1  | 0 | 0.673257  | 0.933974  | -0.813265 |
| 23 | 6  | 0 | -2.937357 | 1.616825  | 1.218501  |
| 24 | 6  | 0 | -2.546181 | 1.629279  | -0.164577 |
| 25 | 6  | 0 | -3.029109 | 2.672860  | -1.004770 |
| 26 | 6  | 0 | -3.853458 | 3.638383  | -0.474793 |
| 27 | 6  | 0 | -4.223969 | 3.605720  | 0.886989  |
| 28 | 6  | 0 | -3.771068 | 2.599747  | 1.737181  |
| 29 | 6  | 0 | -1.493639 | -0.340969 | 0.417923  |
| 30 | 1  | 0 | -2.736451 | 2.676164  | -2.049687 |
| 31 | 1  | 0 | -4.229444 | 4.435413  | -1.108089 |
| 32 | 1  | 0 | -4.877170 | 4.378131  | 1.280032  |
| 33 | 1  | 0 | -4.065432 | 2.585311  | 2.781515  |
| 34 | 7  | 0 | -1.756722 | 0.647870  | -0.582895 |
| 35 | 16 | 0 | -2.216989 | 0.270217  | 2.042835  |
| 36 | 7  | 0 | 2.289996  | -0.270499 | -0.293560 |
| 37 | 1  | 0 | 2.570005  | -1.253147 | -0.243193 |
| 38 | 16 | 0 | 3.323600  | 0.518066  | -1.342804 |
| 39 | 8  | 0 | 2.927960  | 1.923947  | -1.328493 |
| 40 | 8  | 0 | 3.417292  | -0.160198 | -2.636431 |
| 41 | 6  | 0 | 4.863214  | 0.310515  | -0.493501 |
| 42 | 6  | 0 | 5.049050  | 0.955778  | 0.730170  |
| 43 | 6  | 0 | 5.859643  | -0.470324 | -1.065061 |
| 44 | 6  | 0 | 6.260083  | 0.802173  | 1.387554  |
| 45 | 1  | 0 | 4.256028  | 1.563853  | 1.155369  |
| 46 | 6  | 0 | 7.069987  | -0.611647 | -0.388775 |
| 47 | 1  | 0 | 5.690436  | -0.955881 | -2.020647 |
| 48 | 6  | 0 | 7.285808  | 0.017462  | 0.838769  |
| 49 | 1  | 0 | 6.419968  | 1.297435  | 2.341662  |
| 50 | 1  | 0 | 7.857839  | -1.219700 | -0.824155 |
| 51 | 6  | 0 | 8.592451  | -0.131259 | 1.570312  |
| 52 | 1  | 0 | 9.276501  | -0.791115 | 1.031502  |
| 53 | 1  | 0 | 9.079337  | 0.841852  | 1.694052  |
| 54 | 1  | 0 | 8.431892  | -0.543594 | 2.571882  |
| 55 | 6  | 0 | -0.732845 | -2.691325 | 1.778084  |
| 56 | 1  | 0 | -0.430876 | -3.685429 | 2.120795  |
| 57 | 1  | 0 | -0.905451 | -2.095630 | 2.684551  |
| 58 | 6  | 0 | 0.382769  | -2.047714 | 0.961839  |
| 59 | 1  | 0 | 1.319818  | -2.063012 | 1.528349  |
| 60 | 1  | 0 | 0.538114  | -2.627804 | 0.044299  |

-----  
0 imaginary frequencies

Zero-point Energies= -2137.415627  
Thermal Energies= -2137.386591  
Thermal Enthalpies= -2137.385647  
Thermal Free Energies= -2137.479117

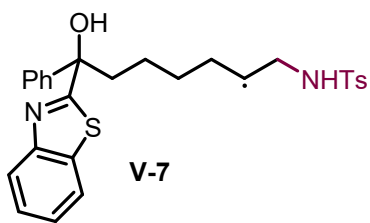

10.

Charge = 0 Multiplicity = 2

| Center Number | Atomic Number | Atomic Type | Coordinates (Angstroms) |           |           |
|---------------|---------------|-------------|-------------------------|-----------|-----------|
|               |               |             | X                       | Y         | Z         |
| 1             | 6             | 0           | -2.655949               | 3.092559  | -0.922063 |
| 2             | 6             | 0           | -2.936100               | 2.461167  | 0.291428  |
| 3             | 6             | 0           | -3.645745               | 3.160689  | 1.272924  |
| 4             | 6             | 0           | -4.062093               | 4.468397  | 1.048004  |
| 5             | 6             | 0           | -3.778013               | 5.095426  | -0.165276 |
| 6             | 6             | 0           | -3.075652               | 4.404207  | -1.147528 |
| 7             | 1             | 0           | -2.105033               | 2.576213  | -1.701678 |
| 8             | 1             | 0           | -3.858516               | 2.670098  | 2.217221  |
| 9             | 1             | 0           | -4.609118               | 4.999941  | 1.821097  |
| 10            | 1             | 0           | -4.101870               | 6.116729  | -0.341589 |
| 11            | 1             | 0           | -2.846605               | 4.883788  | -2.094471 |
| 12            | 6             | 0           | -2.549645               | 1.006879  | 0.571743  |
| 13            | 8             | 0           | -2.232787               | 0.891945  | 1.943993  |
| 14            | 1             | 0           | -2.646045               | 0.070738  | 2.268787  |
| 15            | 6             | 0           | -1.350783               | 0.525512  | -0.272366 |
| 16            | 1             | 0           | -1.589218               | 0.594176  | -1.339880 |
| 17            | 1             | 0           | -0.524796               | 1.220748  | -0.077149 |
| 18            | 6             | 0           | 2.022852                | -3.149053 | -1.114717 |
| 19            | 1             | 0           | 1.998283                | -3.155892 | -2.200791 |
| 20            | 6             | 0           | 3.348333                | -3.230277 | -0.442479 |
| 21            | 1             | 0           | 3.256028                | -3.717473 | 0.537741  |
| 22            | 1             | 0           | 4.066554                | -3.789464 | -1.045823 |
| 23            | 6             | 0           | -5.612426               | -1.151180 | -0.669371 |
| 24            | 6             | 0           | -5.216311               | -1.505219 | 0.634089  |
| 25            | 6             | 0           | -5.880135               | -2.533874 | 1.311280  |
| 26            | 6             | 0           | -6.923481               | -3.184553 | 0.671636  |
| 27            | 6             | 0           | -7.311894               | -2.821844 | -0.628341 |
| 28            | 6             | 0           | -6.664598               | -1.802611 | -1.313930 |
| 29            | 6             | 0           | -3.749886               | 0.113101  | 0.287214  |
| 30            | 1             | 0           | -5.569034               | -2.802470 | 2.315787  |
| 31            | 1             | 0           | -7.449031               | -3.985636 | 1.181394  |
| 32            | 1             | 0           | -8.132638               | -3.345919 | -1.107670 |
| 33            | 1             | 0           | -6.967371               | -1.523439 | -2.317867 |
| 34            | 7             | 0           | -4.153518               | -0.765215 | 1.138772  |
| 35            | 16            | 0           | -4.611833               | 0.162503  | -1.241551 |
| 36            | 7             | 0           | 3.909377                | -1.852607 | -0.284482 |
| 37            | 1             | 0           | 3.285317                | -1.267609 | 0.278459  |
| 38            | 16            | 0           | 5.435908                | -1.801827 | 0.393694  |
| 39            | 8             | 0           | 6.278323                | -2.649765 | -0.446742 |
| 40            | 8             | 0           | 5.411500                | -2.063814 | 1.834195  |

|    |   |   |           |           |           |
|----|---|---|-----------|-----------|-----------|
| 41 | 6 | 0 | 5.850385  | -0.097357 | 0.149030  |
| 42 | 6 | 0 | 6.013507  | 0.376189  | -1.153911 |
| 43 | 6 | 0 | 6.022954  | 0.729386  | 1.251732  |
| 44 | 6 | 0 | 6.350087  | 1.707919  | -1.342297 |
| 45 | 1 | 0 | 5.875927  | -0.289817 | -2.000591 |
| 46 | 6 | 0 | 6.362469  | 2.064551  | 1.041437  |
| 47 | 1 | 0 | 5.895706  | 0.333856  | 2.254124  |
| 48 | 6 | 0 | 6.528592  | 2.569775  | -0.249428 |
| 49 | 1 | 0 | 6.479573  | 2.091625  | -2.350837 |
| 50 | 1 | 0 | 6.501113  | 2.721848  | 1.895114  |
| 51 | 6 | 0 | 6.891233  | 4.011966  | -0.480138 |
| 52 | 1 | 0 | 7.025556  | 4.543793  | 0.464696  |
| 53 | 1 | 0 | 7.819160  | 4.091333  | -1.055915 |
| 54 | 1 | 0 | 6.108837  | 4.521006  | -1.052988 |
| 55 | 6 | 0 | -0.919685 | -0.902102 | 0.053702  |
| 56 | 1 | 0 | -1.725920 | -1.605822 | -0.195275 |
| 57 | 1 | 0 | -0.742464 | -0.990450 | 1.132395  |
| 58 | 6 | 0 | 0.343868  | -1.301852 | -0.704544 |
| 59 | 1 | 0 | 0.169784  | -1.219281 | -1.785425 |
| 60 | 1 | 0 | 1.153567  | -0.599373 | -0.465695 |
| 61 | 6 | 0 | 0.793747  | -2.737471 | -0.375580 |
| 62 | 1 | 0 | -0.038184 | -3.415130 | -0.618662 |
| 63 | 1 | 0 | 0.964161  | -2.823082 | 0.706116  |

0 imaginary frequencies

Zero-point Energies= -2176.659914

Thermal Energies= -2176.627394

Thermal Enthalpies= -2176.626450

Thermal Free Energies= -2176.73259

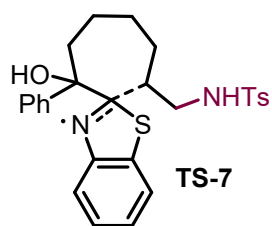

11.

Charge = 0 Multiplicity = 2

| Center Number | Atomic Number | Atomic Type | Coordinates (Angstroms) |          |           |
|---------------|---------------|-------------|-------------------------|----------|-----------|
|               |               |             | X                       | Y        | Z         |
| 1             | 6             | 0           | -4.136299               | 1.719174 | 0.559866  |
| 2             | 6             | 0           | -2.915608               | 1.999445 | -0.064983 |
| 3             | 6             | 0           | -2.270088               | 3.198834 | 0.242783  |
| 4             | 6             | 0           | -2.823948               | 4.092425 | 1.158379  |
| 5             | 6             | 0           | -4.035308               | 3.802775 | 1.779293  |
| 6             | 6             | 0           | -4.690745               | 2.612002 | 1.473236  |
| 7             | 1             | 0           | -4.668099               | 0.797772 | 0.343569  |
| 8             | 1             | 0           | -1.335598               | 3.450059 | -0.246190 |
| 9             | 1             | 0           | -2.304156               | 5.019664 | 1.381272  |



|    |    |   |           |           |           |
|----|----|---|-----------|-----------|-----------|
| 10 | 1  | 0 | -4.467290 | 4.498660  | 2.492081  |
| 11 | 1  | 0 | -5.639067 | 2.373425  | 1.945549  |
| 12 | 6  | 0 | -2.280912 | 1.020012  | -1.079151 |
| 13 | 8  | 0 | -1.154258 | 1.615847  | -1.684912 |
| 14 | 1  | 0 | -0.443093 | 1.629110  | -1.017337 |
| 15 | 6  | 0 | -3.297618 | 0.744543  | -2.195300 |
| 16 | 1  | 0 | -4.211305 | 0.333926  | -1.748667 |
| 17 | 1  | 0 | -3.565720 | 1.738204  | -2.572346 |
| 18 | 6  | 0 | -0.650110 | -1.300614 | -1.885268 |
| 19 | 1  | 0 | -0.405092 | -0.364743 | -2.378004 |
| 20 | 6  | 0 | 0.497675  | -1.939282 | -1.166410 |
| 21 | 1  | 0 | 0.151508  | -2.499277 | -0.283109 |
| 22 | 1  | 0 | 0.977384  | -2.666430 | -1.836611 |
| 23 | 6  | 0 | -1.873522 | -1.795957 | 1.639654  |
| 24 | 6  | 0 | -0.795201 | -0.882239 | 1.626056  |
| 25 | 6  | 0 | 0.193264  | -0.965774 | 2.619803  |
| 26 | 6  | 0 | 0.081755  | -1.944474 | 3.593820  |
| 27 | 6  | 0 | -0.995421 | -2.845731 | 3.594367  |
| 28 | 6  | 0 | -1.980883 | -2.784814 | 2.615944  |
| 29 | 6  | 0 | -1.795590 | -0.198811 | -0.256500 |
| 30 | 1  | 0 | 1.025543  | -0.268409 | 2.605931  |
| 31 | 1  | 0 | 0.841062  | -2.020582 | 4.365676  |
| 32 | 1  | 0 | -1.059964 | -3.604019 | 4.368194  |
| 33 | 1  | 0 | -2.810150 | -3.485059 | 2.614478  |
| 34 | 7  | 0 | -0.813644 | 0.032822  | 0.601144  |
| 35 | 16 | 0 | -2.925691 | -1.472508 | 0.286108  |
| 36 | 7  | 0 | 1.511038  | -0.927896 | -0.821330 |
| 37 | 1  | 0 | 1.145710  | -0.267711 | -0.126883 |
| 38 | 16 | 0 | 2.979935  | -1.533940 | -0.322303 |
| 39 | 8  | 0 | 3.488373  | -2.339922 | -1.430786 |
| 40 | 8  | 0 | 2.914511  | -2.158475 | 0.999938  |
| 41 | 6  | 0 | 3.899885  | -0.027410 | -0.179617 |
| 42 | 6  | 0 | 4.163493  | 0.715519  | -1.331462 |
| 43 | 6  | 0 | 4.353030  | 0.378607  | 1.069281  |
| 44 | 6  | 0 | 4.890595  | 1.890475  | -1.215151 |
| 45 | 1  | 0 | 3.801576  | 0.376827  | -2.297715 |
| 46 | 6  | 0 | 5.082792  | 1.561959  | 1.165018  |
| 47 | 1  | 0 | 4.139743  | -0.222781 | 1.947157  |
| 48 | 6  | 0 | 5.359023  | 2.330072  | 0.032287  |
| 49 | 1  | 0 | 5.103894  | 2.480238  | -2.102745 |
| 50 | 1  | 0 | 5.443382  | 1.891093  | 2.135390  |
| 51 | 6  | 0 | 6.141031  | 3.611711  | 0.133345  |
| 52 | 1  | 0 | 5.524860  | 4.465325  | -0.168945 |
| 53 | 1  | 0 | 6.488775  | 3.784943  | 1.154469  |
| 54 | 1  | 0 | 7.011982  | 3.588940  | -0.529607 |
| 55 | 6  | 0 | -2.894485 | -0.134694 | -3.385166 |
| 56 | 1  | 0 | -1.932780 | 0.195612  | -3.793985 |
| 57 | 1  | 0 | -3.636533 | 0.063601  | -4.165902 |
| 58 | 6  | 0 | -2.893587 | -1.644233 | -3.104603 |
| 59 | 1  | 0 | -3.678028 | -1.859876 | -2.368918 |

|    |   |   |           |           |           |
|----|---|---|-----------|-----------|-----------|
| 60 | 1 | 0 | -3.187064 | -2.180610 | -4.012630 |
| 61 | 6 | 0 | -1.555729 | -2.233046 | -2.626045 |
| 62 | 1 | 0 | -0.981459 | -2.564177 | -3.507641 |
| 63 | 1 | 0 | -1.733609 | -3.137467 | -2.030873 |

-----  
 1 imaginary frequencies (-448.12)

Zero-point Energies= -2176.645642

Thermal Energies= -2176.615128

Thermal Enthalpies= -2176.614184

Thermal Free Energies= -2176.710285

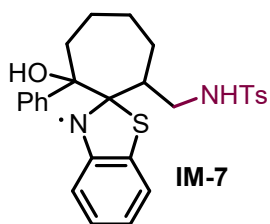

12. Charge = 0 Multiplicity = 2

| Center Number | Atomic Number | Atomic Type | Coordinates (Angstroms) |           |           |
|---------------|---------------|-------------|-------------------------|-----------|-----------|
|               |               |             | X                       | Y         | Z         |
| 1             | 6             | 0           | -2.655508               | 3.092468  | -0.922122 |
| 2             | 6             | 0           | -2.935741               | 2.461107  | 0.291367  |
| 3             | 6             | 0           | -3.645371               | 3.160680  | 1.272834  |
| 4             | 6             | 0           | -4.061627               | 4.468415  | 1.047891  |
| 5             | 6             | 0           | -3.777466               | 5.095414  | -0.165383 |
| 6             | 6             | 0           | -3.075118               | 4.404140  | -1.147609 |
| 7             | 1             | 0           | -2.104607               | 2.576073  | -1.701716 |
| 8             | 1             | 0           | -3.858207               | 2.670111  | 2.217129  |
| 9             | 1             | 0           | -4.608641               | 4.999999  | 1.820966  |
| 10            | 1             | 0           | -4.101252               | 6.116736  | -0.341719 |
| 11            | 1             | 0           | -2.846015               | 4.883702  | -2.094549 |
| 12            | 6             | 0           | -2.549398               | 1.006798  | 0.571716  |
| 13            | 8             | 0           | -2.232519               | 0.891899  | 1.943961  |
| 14            | 1             | 0           | -2.645707               | 0.070661  | 2.268763  |
| 15            | 6             | 0           | -1.350611               | 0.525306  | -0.272425 |
| 16            | 1             | 0           | -1.589112               | 0.593909  | -1.339929 |
| 17            | 1             | 0           | -0.524570               | 1.220509  | -0.077315 |
| 18            | 6             | 0           | 2.022860                | -3.149419 | -1.114690 |
| 19            | 1             | 0           | 1.998245                | -3.156334 | -2.200763 |
| 20            | 6             | 0           | 3.348371                | -3.230499 | -0.442485 |
| 21            | 1             | 0           | 3.256147                | -3.717694 | 0.537742  |
| 22            | 1             | 0           | 4.066639                | -3.789611 | -1.045843 |
| 23            | 6             | 0           | -5.612385               | -1.151040 | -0.669281 |
| 24            | 6             | 0           | -5.216231               | -1.505123 | 0.634155  |
| 25            | 6             | 0           | -5.880074               | -2.533758 | 1.311358  |
| 26            | 6             | 0           | -6.923483               | -3.184373 | 0.671751  |
| 27            | 6             | 0           | -7.311937               | -2.821618 | -0.628201 |
| 28            | 6             | 0           | -6.664619               | -1.802407 | -1.313802 |

|    |    |   |           |           |           |
|----|----|---|-----------|-----------|-----------|
| 29 | 6  | 0 | -3.749728 | 0.113117  | 0.287244  |
| 30 | 1  | 0 | -5.568936 | -2.802388 | 2.315845  |
| 31 | 1  | 0 | -7.449048 | -3.985440 | 1.181518  |
| 32 | 1  | 0 | -8.132731 | -3.345638 | -1.107503 |
| 33 | 1  | 0 | -6.967431 | -1.523201 | -2.317717 |
| 34 | 7  | 0 | -4.153370 | -0.765191 | 1.138803  |
| 35 | 16 | 0 | -4.611755 | 0.162606  | -1.241479 |
| 36 | 7  | 0 | 3.909270  | -1.852766 | -0.284506 |
| 37 | 1  | 0 | 3.285210  | -1.267873 | 0.278547  |
| 38 | 16 | 0 | 5.435865  | -1.801843 | 0.393529  |
| 39 | 8  | 0 | 6.278325  | -2.649572 | -0.447073 |
| 40 | 8  | 0 | 5.411631  | -2.063985 | 1.834005  |
| 41 | 6  | 0 | 5.850060  | -0.097287 | 0.148997  |
| 42 | 6  | 0 | 6.012887  | 0.376443  | -1.153914 |
| 43 | 6  | 0 | 6.022741  | 0.729336  | 1.251773  |
| 44 | 6  | 0 | 6.349281  | 1.708234  | -1.342194 |
| 45 | 1  | 0 | 5.875231  | -0.289473 | -2.000653 |
| 46 | 6  | 0 | 6.362059  | 2.064567  | 1.041583  |
| 47 | 1  | 0 | 5.895724  | 0.333666  | 2.254138  |
| 48 | 6  | 0 | 6.527883  | 2.569973  | -0.249249 |
| 49 | 1  | 0 | 6.478549  | 2.092081  | -2.350709 |
| 50 | 1  | 0 | 6.500793  | 2.721770  | 1.895318  |
| 51 | 6  | 0 | 6.890258  | 4.012251  | -0.479844 |
| 52 | 1  | 0 | 7.025311  | 4.543820  | 0.465031  |
| 53 | 1  | 0 | 7.817699  | 4.091841  | -1.056367 |
| 54 | 1  | 0 | 6.107351  | 4.521404  | -1.051898 |
| 55 | 6  | 0 | -0.919556 | -0.902306 | 0.053718  |
| 56 | 1  | 0 | -1.725850 | -1.606009 | -0.195117 |
| 57 | 1  | 0 | -0.742223 | -0.990573 | 1.132398  |
| 58 | 6  | 0 | 0.343901  | -1.302179 | -0.704626 |
| 59 | 1  | 0 | 0.169689  | -1.219750 | -1.785497 |
| 60 | 1  | 0 | 1.153641  | -0.599682 | -0.465974 |
| 61 | 6  | 0 | 0.793789  | -2.737767 | -0.375531 |
| 62 | 1  | 0 | -0.038156 | -3.415447 | -0.618508 |
| 63 | 1  | 0 | 0.964258  | -2.823268 | 0.706165  |

-----  
0 imaginary frequencies

Zero-point Energies= -2176.684650  
Thermal Energies= -2176.654499  
Thermal Enthalpies= -2176.653555  
Thermal Free Energies= -2176.749534

## 10. NMR spectra of compound

$^1\text{H}$  NMR of Cz-NI in  $\text{CDCl}_3$  (400 MHz,  $\text{CDCl}_3$ )

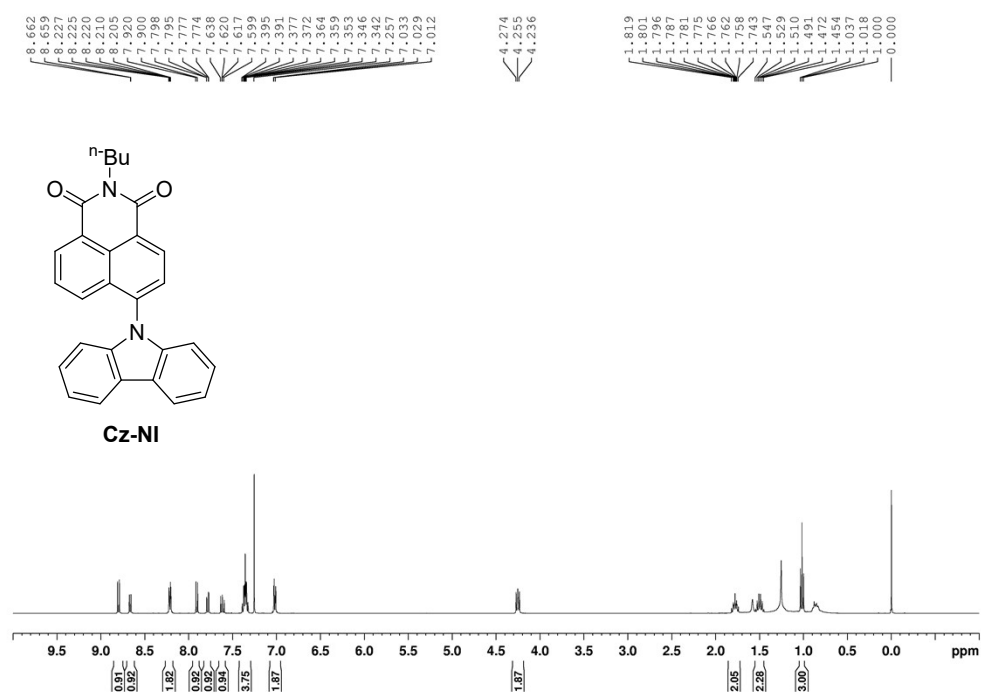

$^{13}\text{C}$  NMR of Cz-NI in  $\text{CDCl}_3$  (400 MHz,  $\text{CDCl}_3$ )

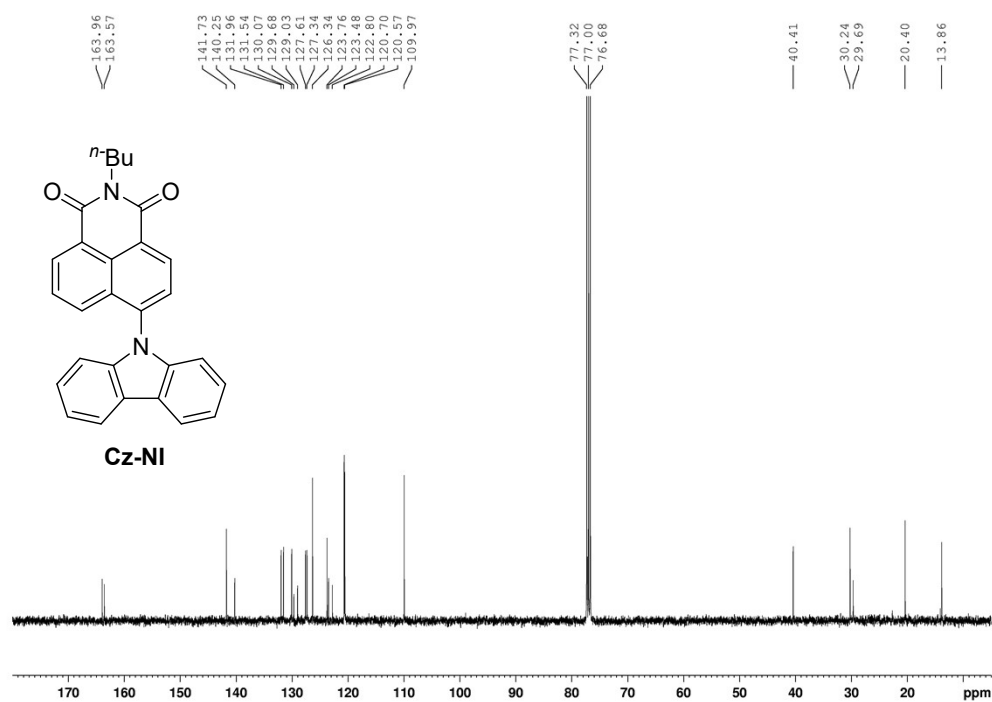

$^1\text{H}$  NMR of **3aa** in  $\text{CDCl}_3$  (400 MHz,  $\text{CDCl}_3$ )

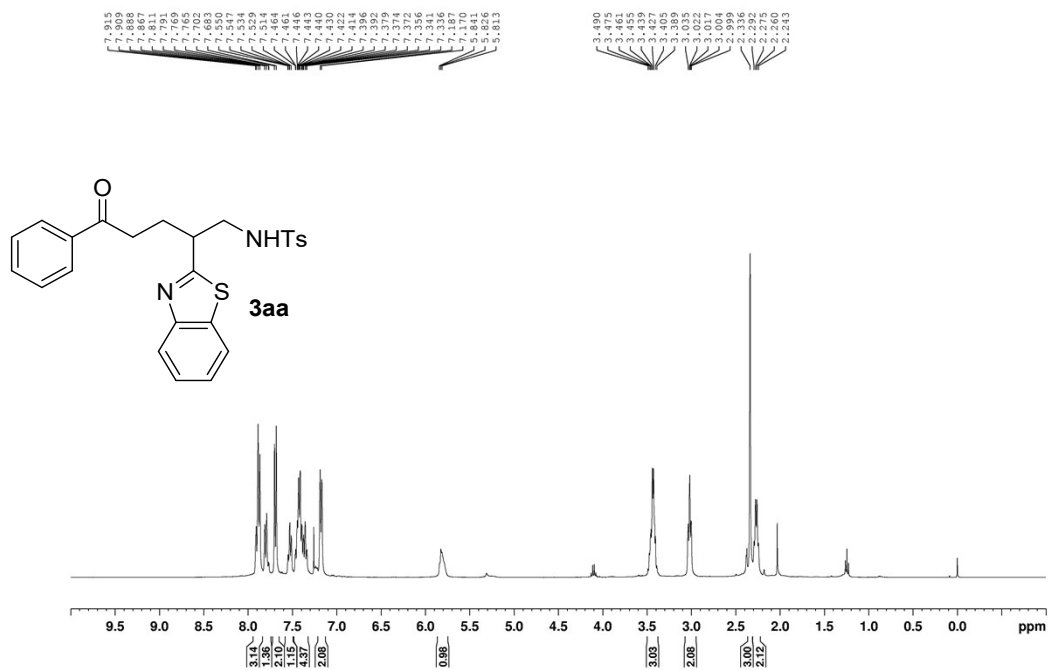

$^{13}\text{C}$  NMR of **3aa** in  $\text{CDCl}_3$  (151 MHz,  $\text{CDCl}_3$ )

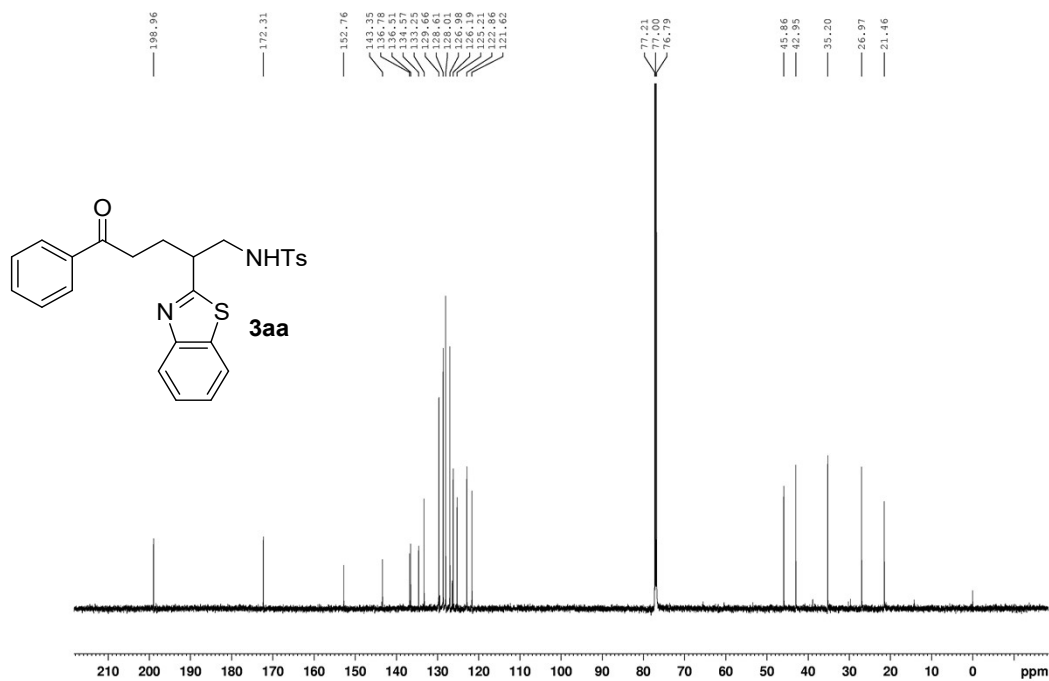

$^1\text{H}$  NMR of **3ab** in  $\text{CDCl}_3$  (400 MHz,  $\text{CDCl}_3$ )

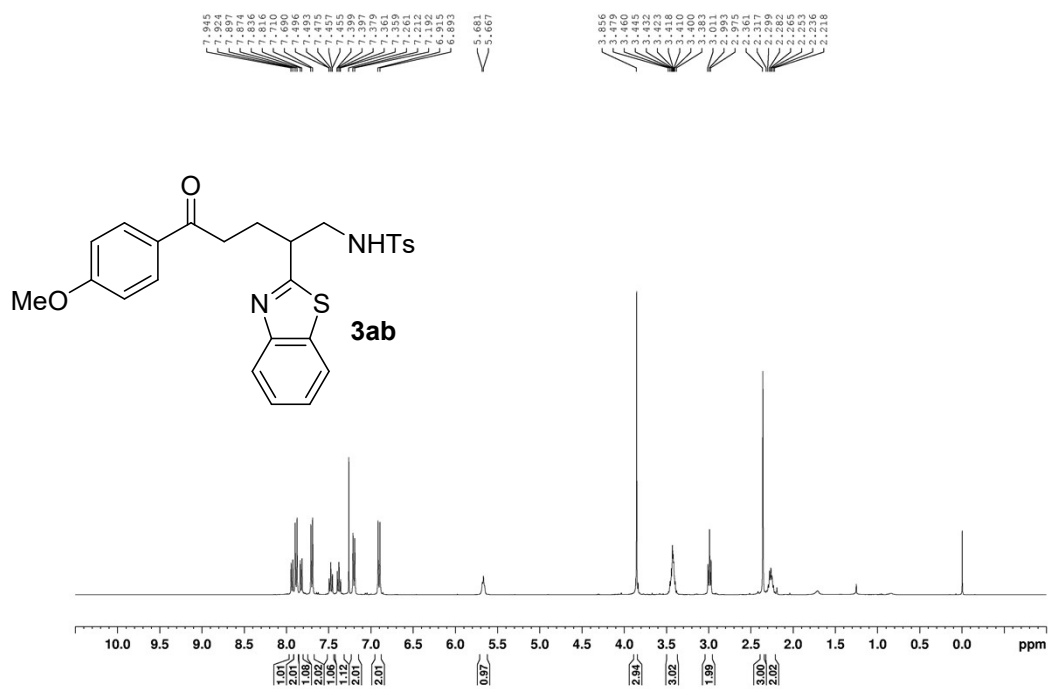

$^{13}\text{C}$  NMR of **3ab** in  $\text{CDCl}_3$  (101 MHz,  $\text{CDCl}_3$ )

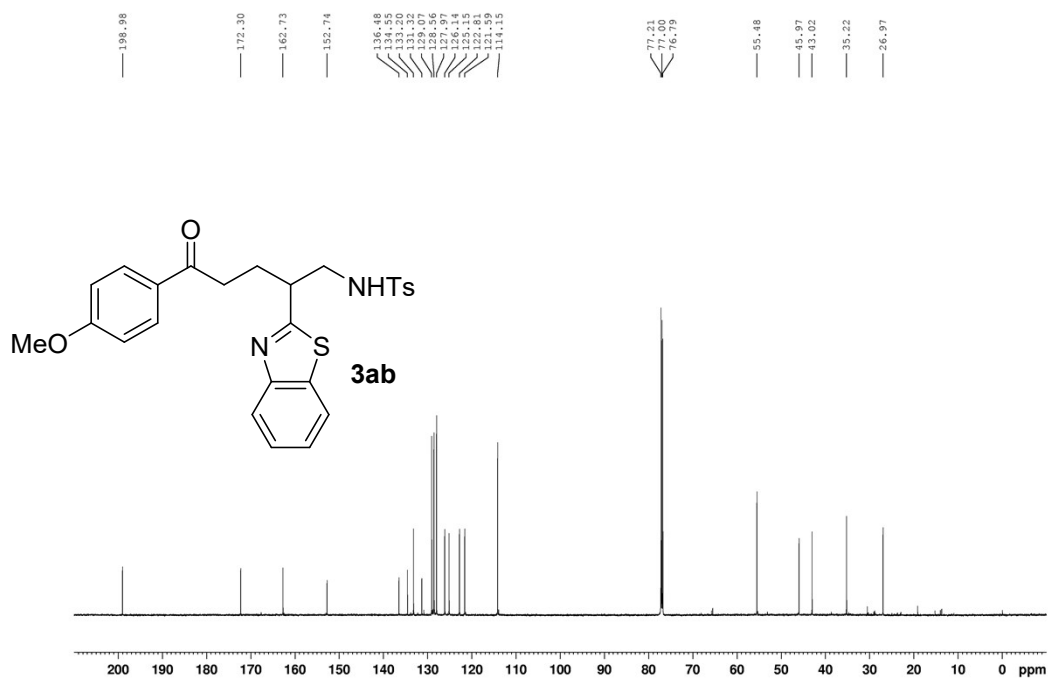

$^1\text{H}$  NMR of **3ac** in  $\text{CDCl}_3$  (400 MHz,  $\text{CDCl}_3$ )

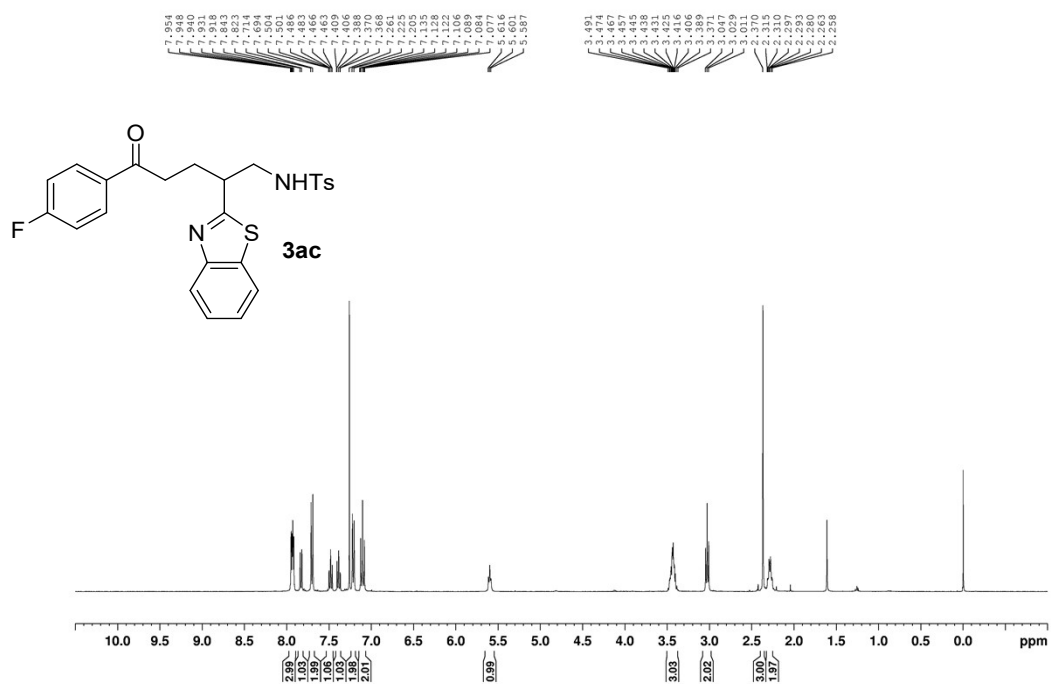

$^{13}\text{C}$  NMR of **3ac** in  $\text{CDCl}_3$  (101 MHz,  $\text{CDCl}_3$ )

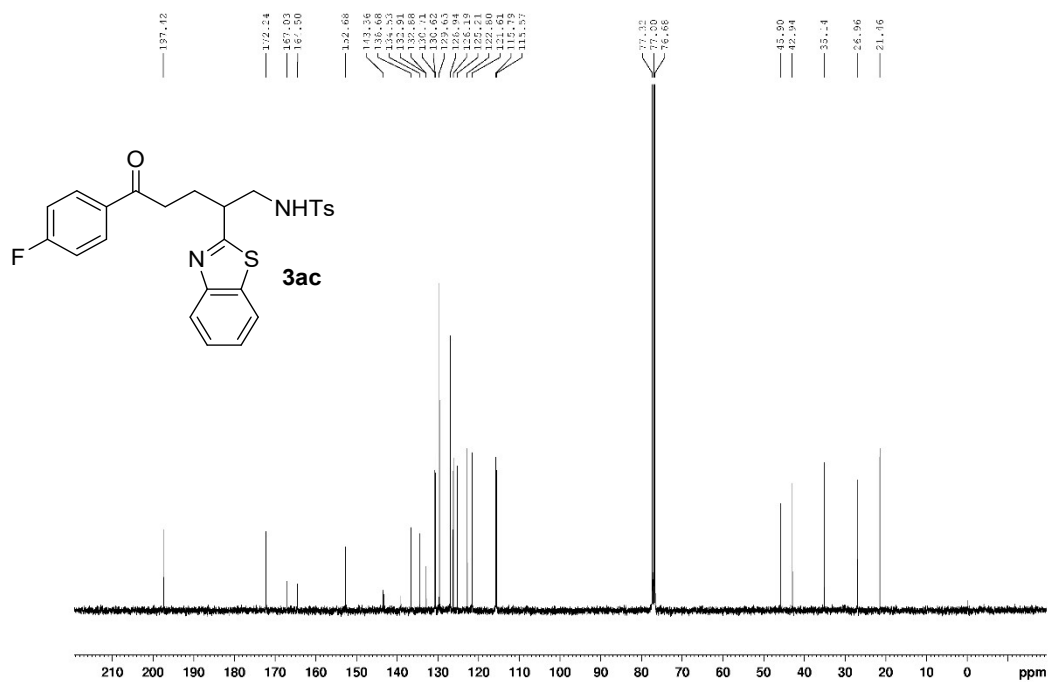

$^{19}\text{F}$  NMR of **3ac** in  $\text{CDCl}_3$  (376 MHz,  $\text{CDCl}_3$ )

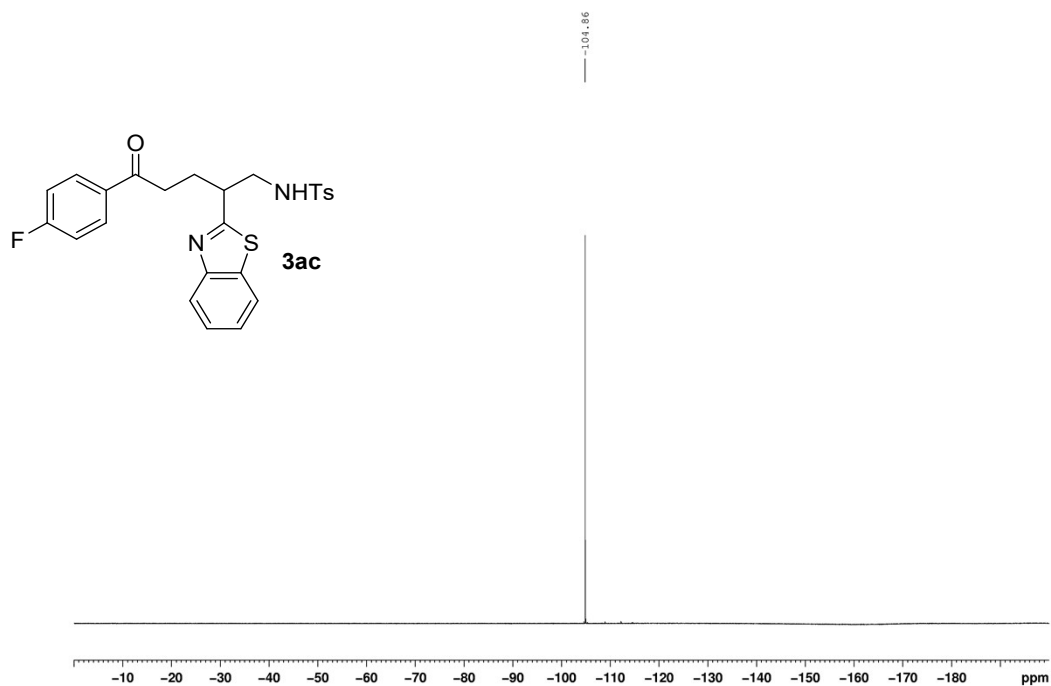

$^1\text{H}$  NMR of **3ad** in  $\text{CDCl}_3$  (400 MHz,  $\text{CDCl}_3$ )

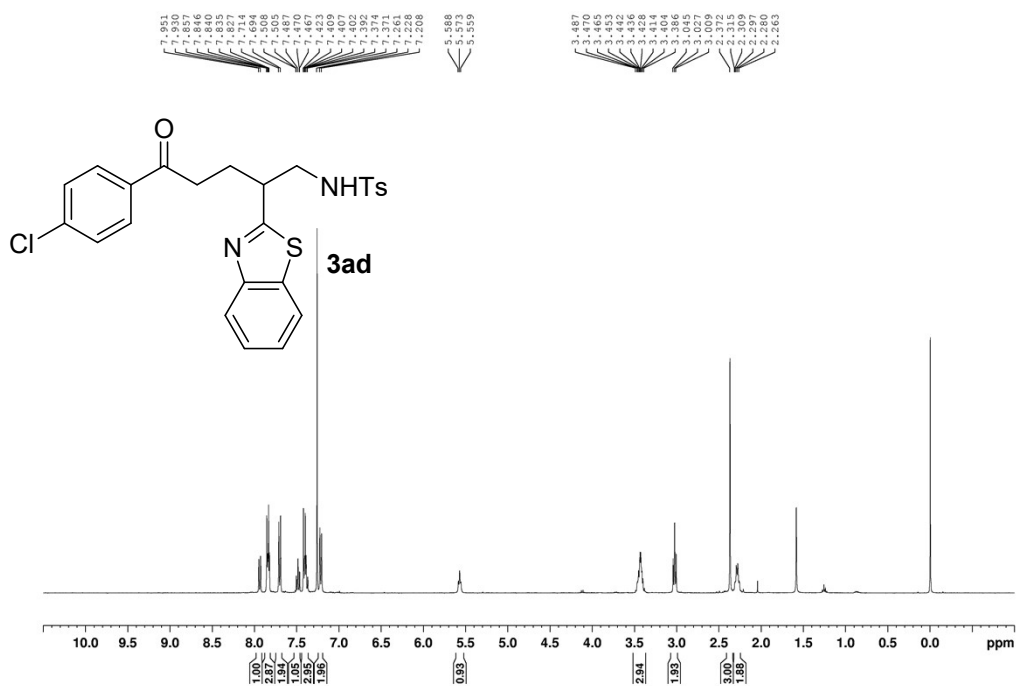



$^{13}\text{C}$  NMR of **3ad** in  $\text{CDCl}_3$  (101 MHz,  $\text{CDCl}_3$ )

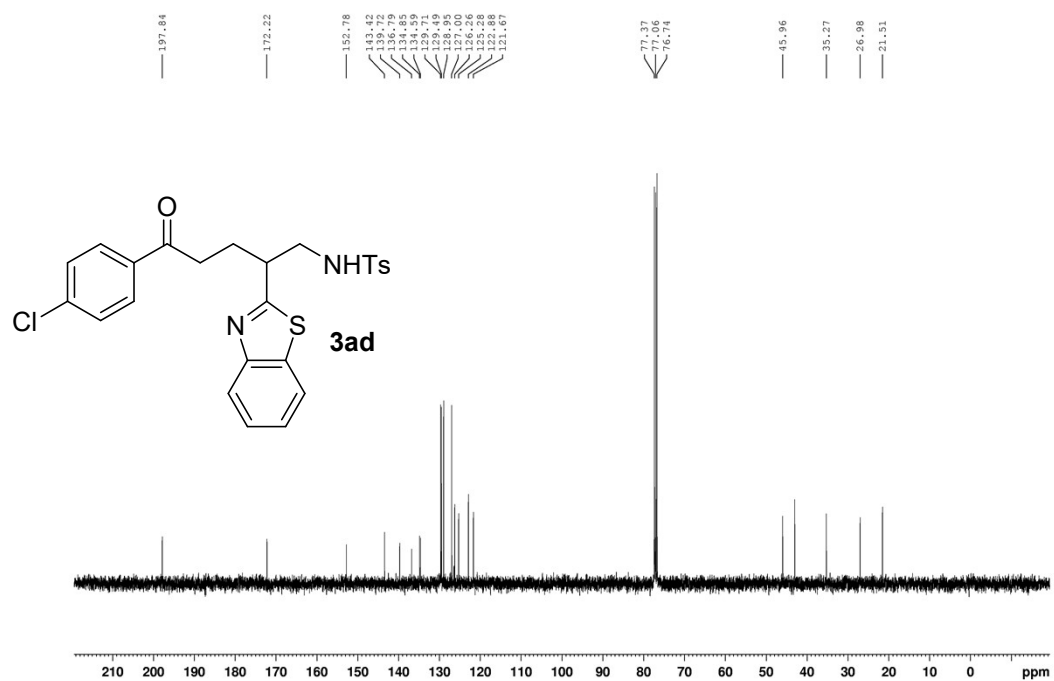

$^1\text{H}$  NMR of **3ae** in  $\text{CDCl}_3$  (400 MHz,  $\text{CDCl}_3$ )

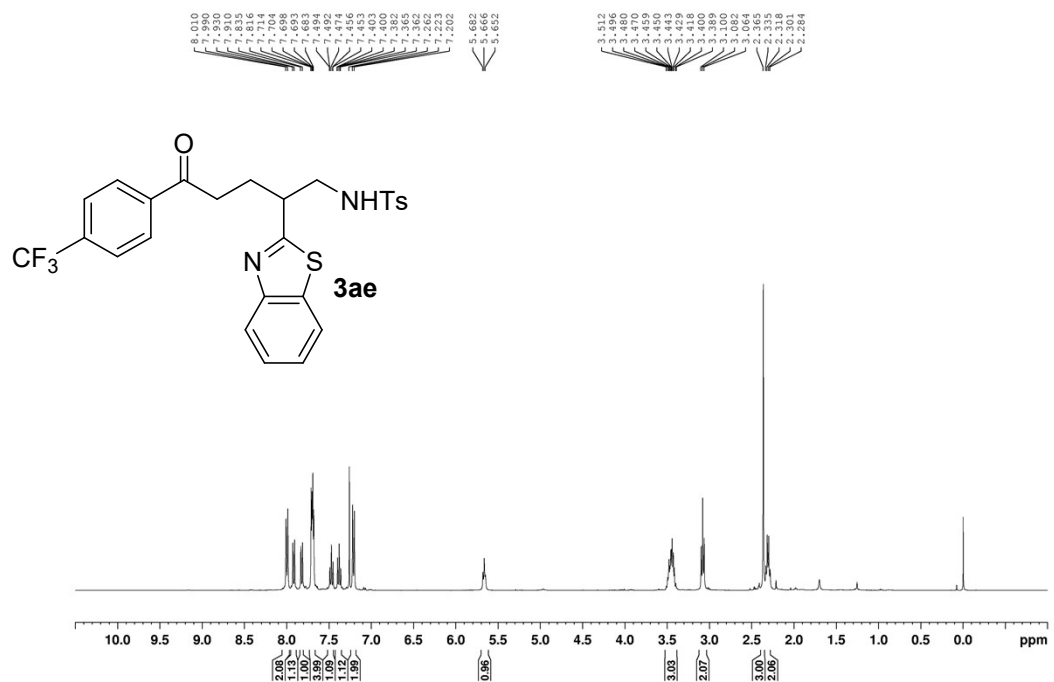



$^1\text{H}$  NMR of **3af** in  $\text{CDCl}_3$  (600 MHz,  $\text{CDCl}_3$ )

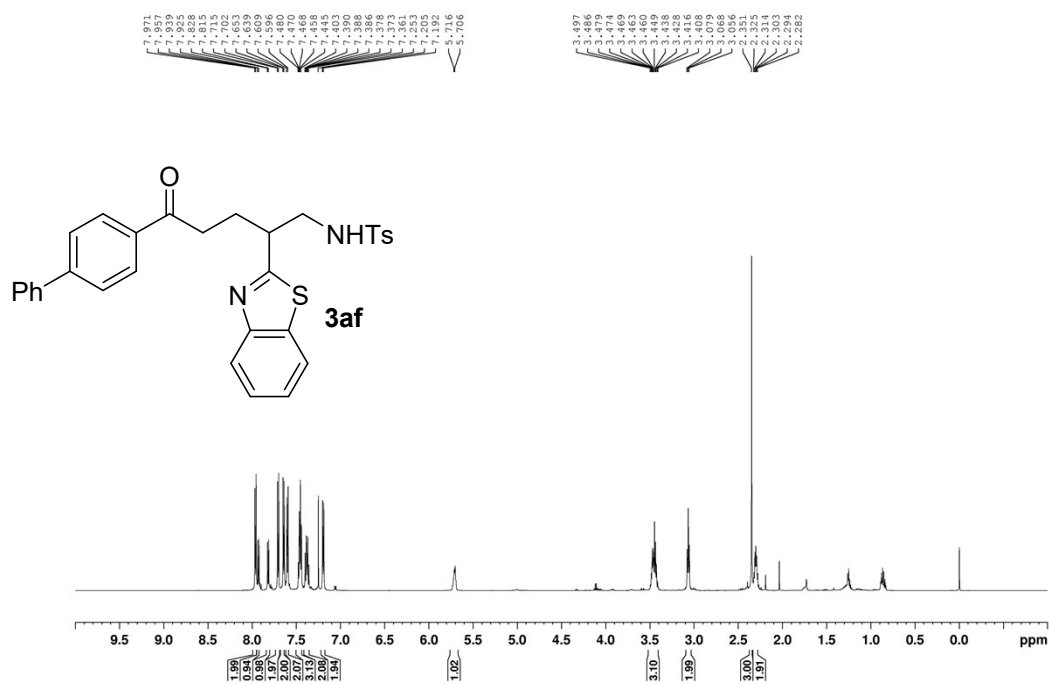

$^{13}\text{C}$  NMR of **3af** in  $\text{CDCl}_3$  (151 MHz,  $\text{CDCl}_3$ )

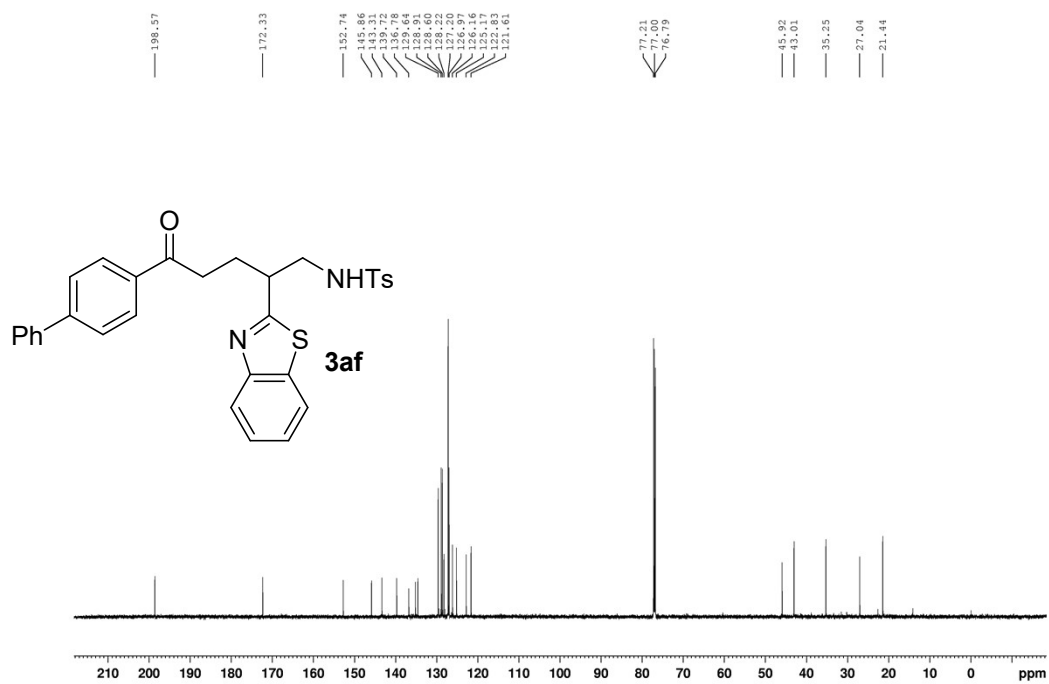





$^1\text{H}$  NMR of **3ai** in  $\text{CDCl}_3$  (400 MHz,  $\text{CDCl}_3$ )

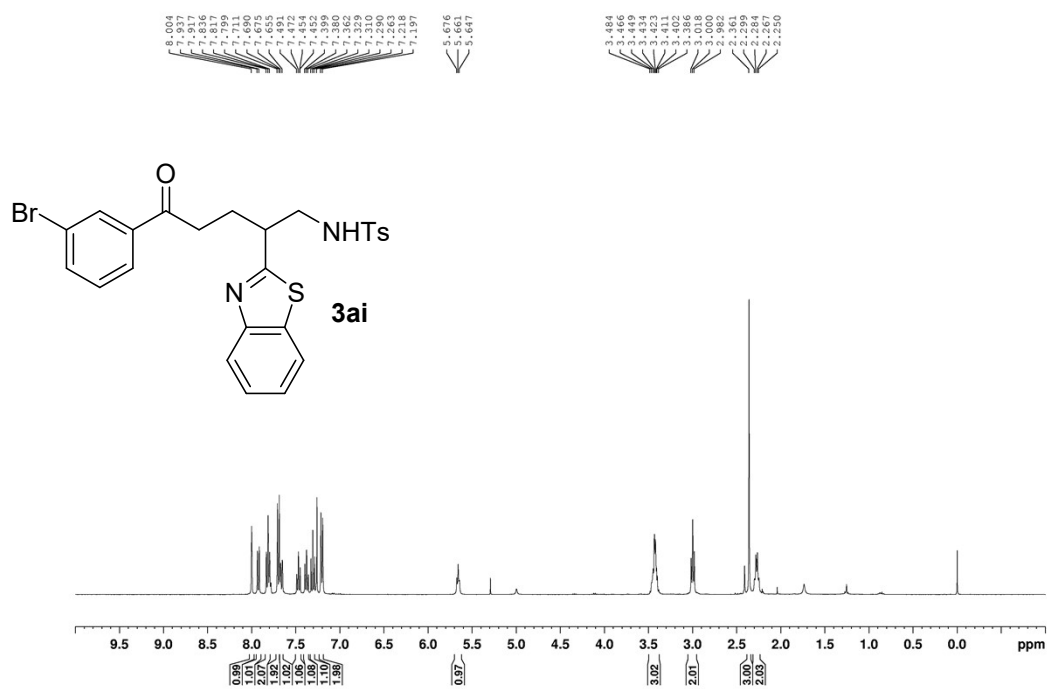

$^{13}\text{C}$  NMR of **3ai** in  $\text{CDCl}_3$  (101 MHz,  $\text{CDCl}_3$ )

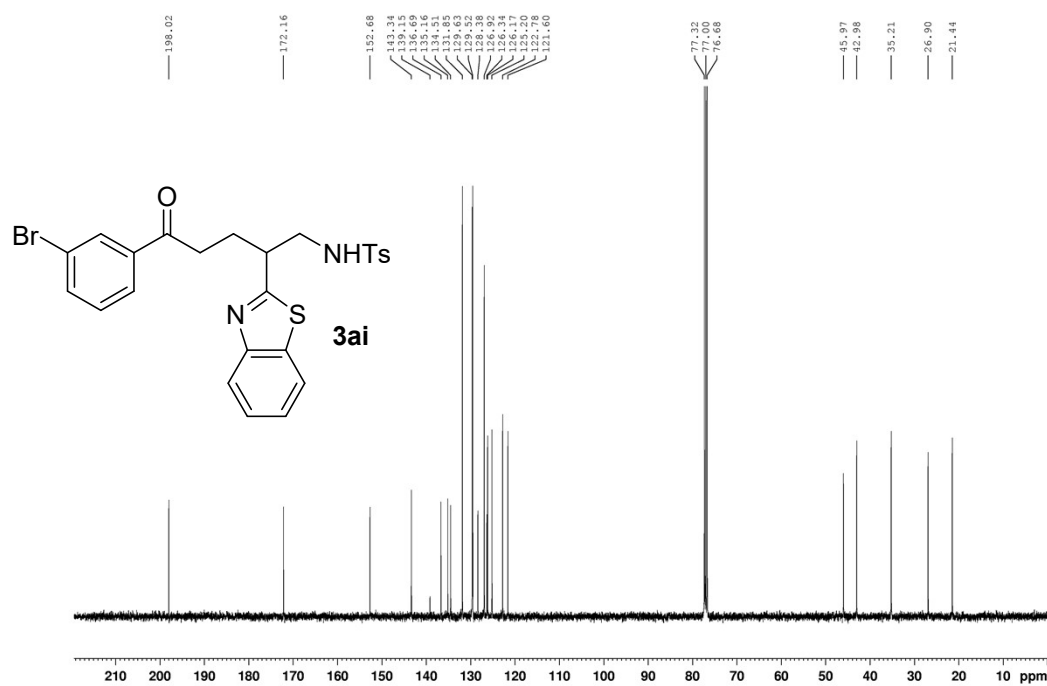



$^{19}\text{F}$  NMR of **3aj** in  $\text{CDCl}_3$  (565 MHz,  $\text{CDCl}_3$ )

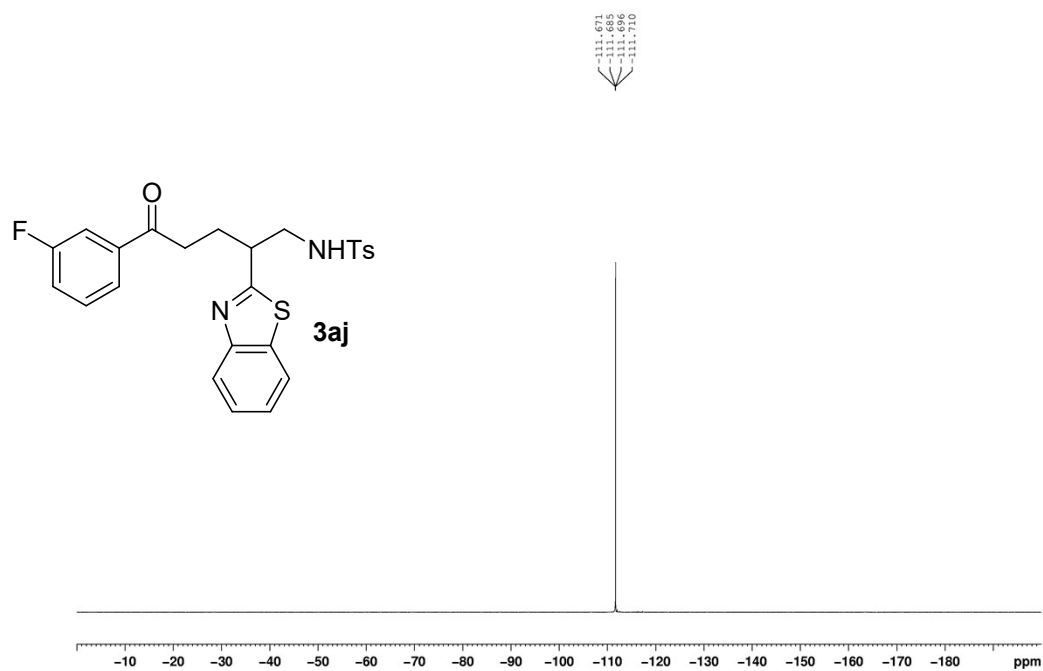

$^1\text{H}$  NMR of **3ak** in  $\text{CDCl}_3$  (600 MHz,  $\text{CDCl}_3$ )

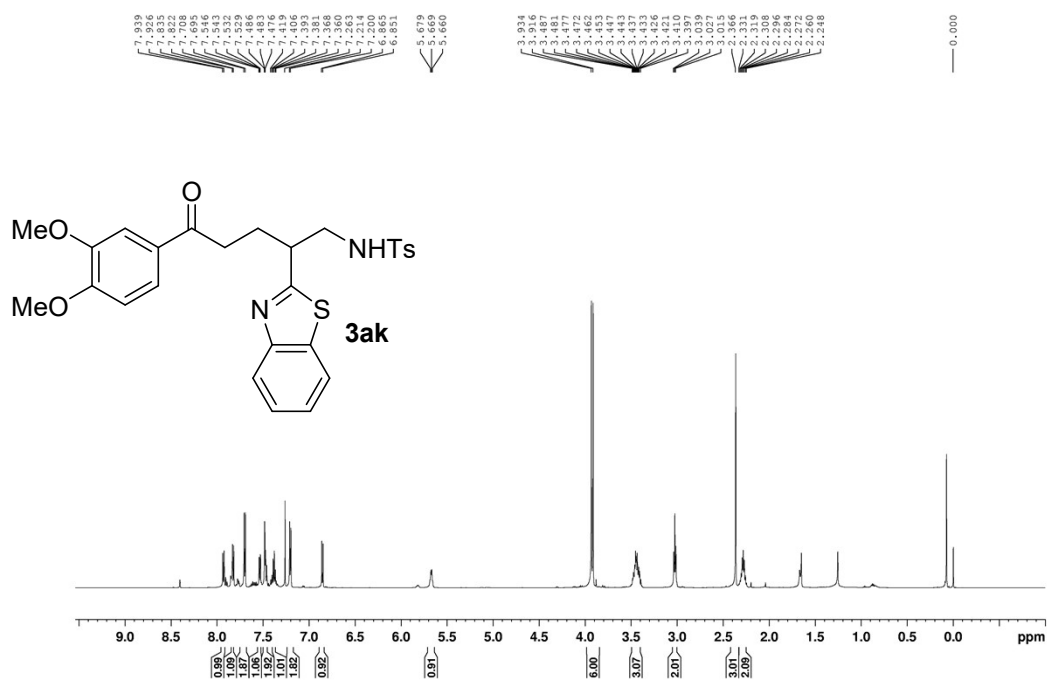



$^{13}\text{C}$  NMR of **3ak** in  $\text{CDCl}_3$  (151 MHz,  $\text{CDCl}_3$ )

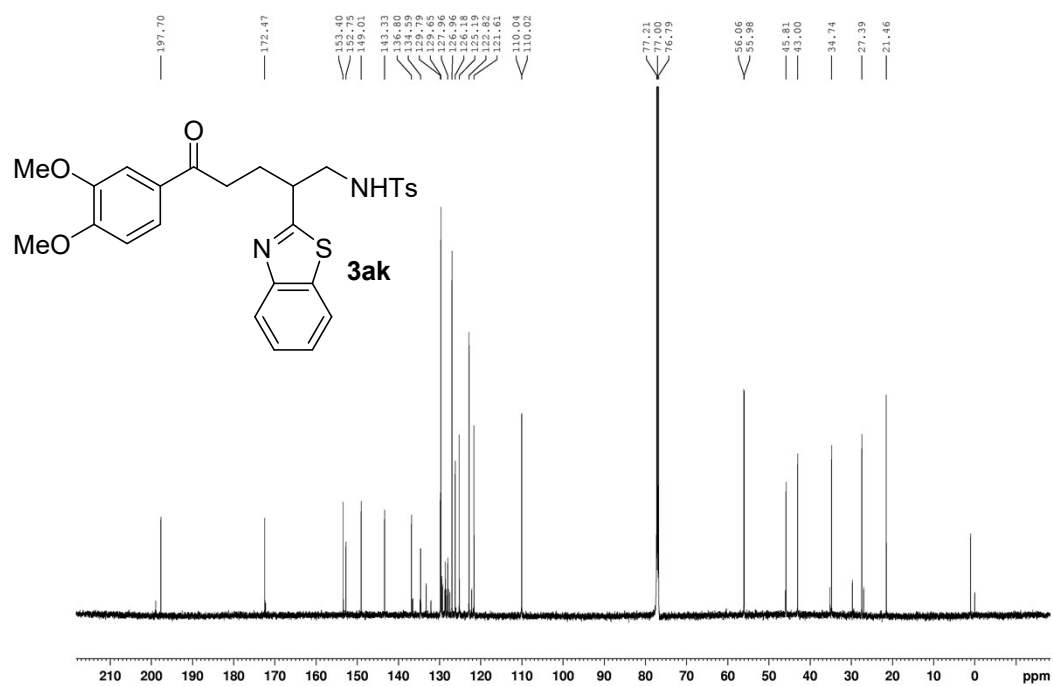

$^1\text{H}$  NMR of **3al** in  $\text{CDCl}_3$  (400 MHz,  $\text{CDCl}_3$ )

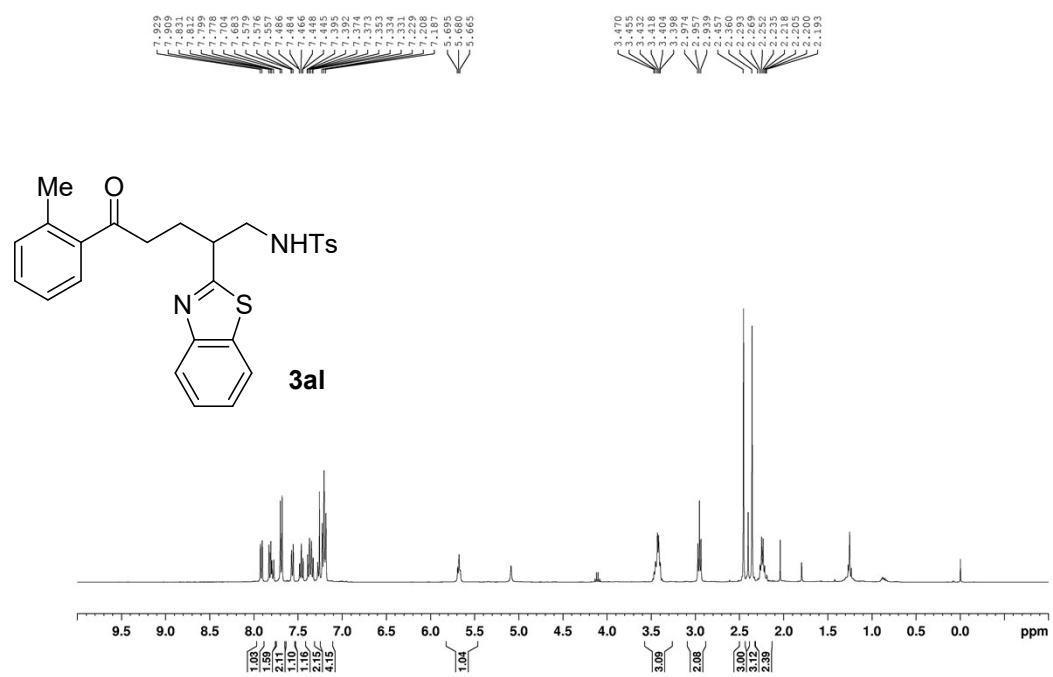

$^{13}\text{C}$  NMR of **3al** in  $\text{CDCl}_3$  (101 MHz,  $\text{CDCl}_3$ )

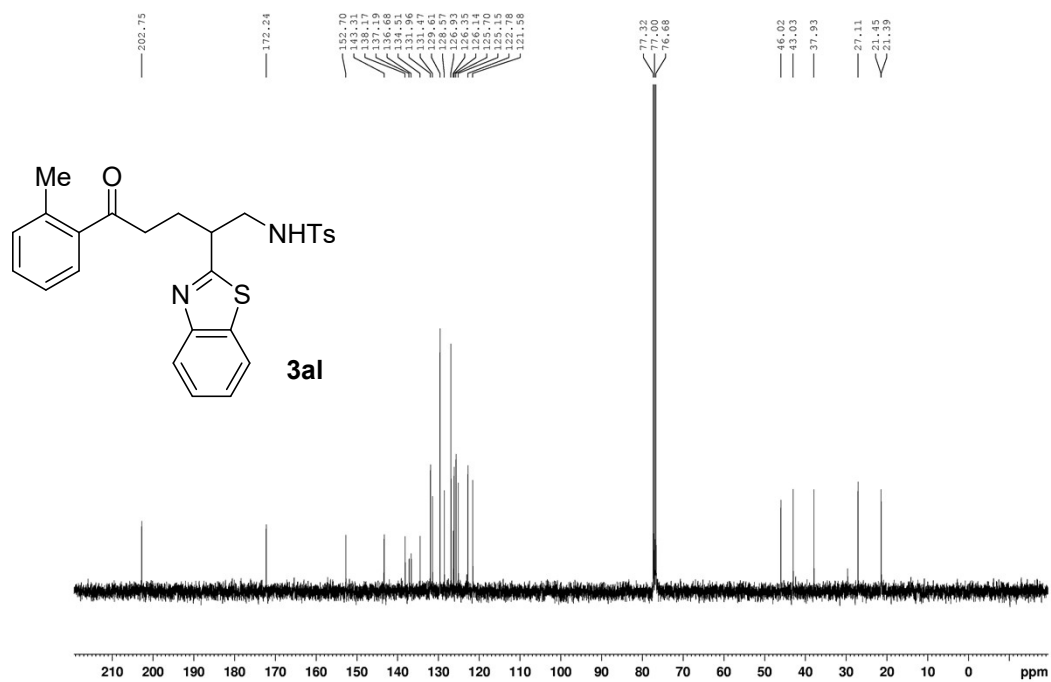

$^1\text{H}$  NMR of **3am** in  $\text{CDCl}_3$  (400 MHz,  $\text{CDCl}_3$ )

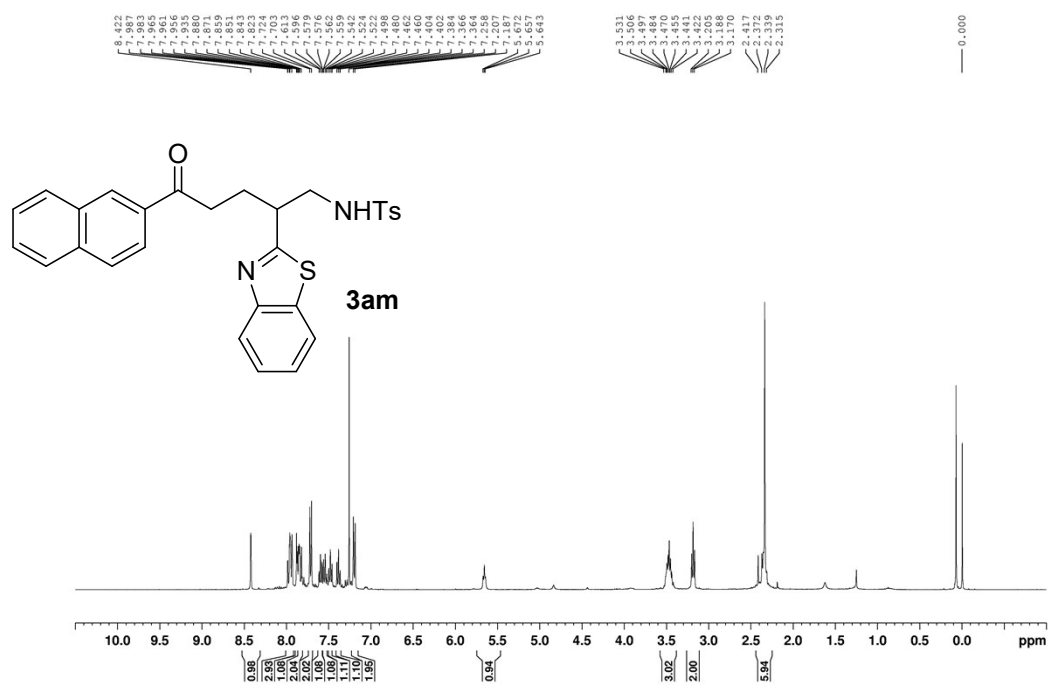



$^{13}\text{C}$  NMR of **3an** in  $\text{CDCl}_3$  (151 MHz,  $\text{CDCl}_3$ )

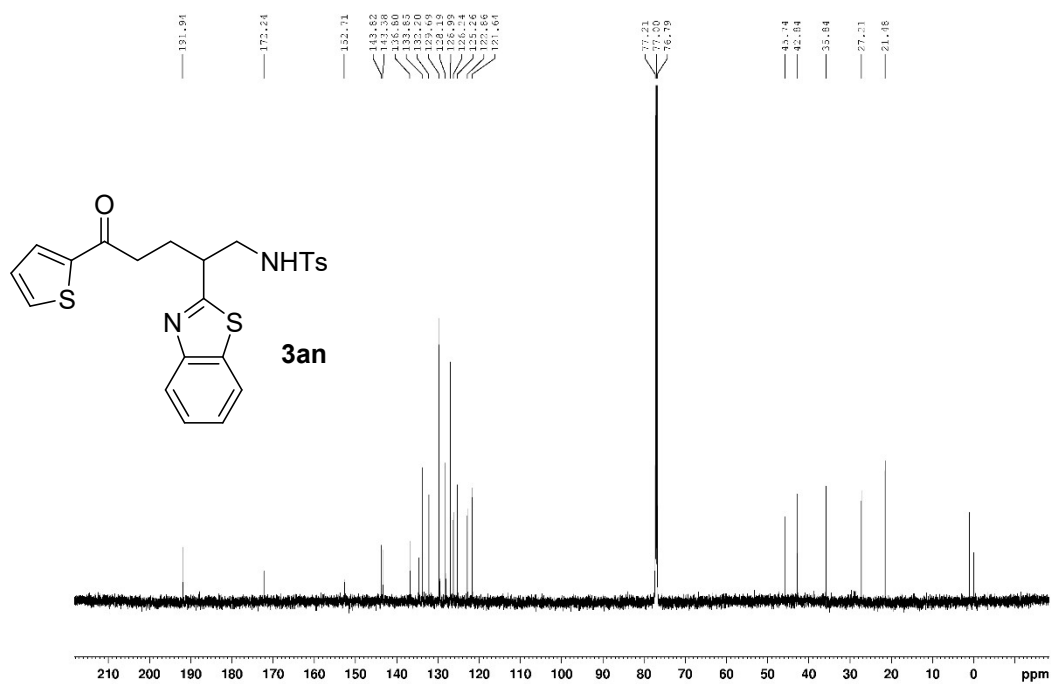

$^1\text{H}$  NMR of **3ao** in  $\text{CDCl}_3$  (400 MHz,  $\text{CDCl}_3$ )

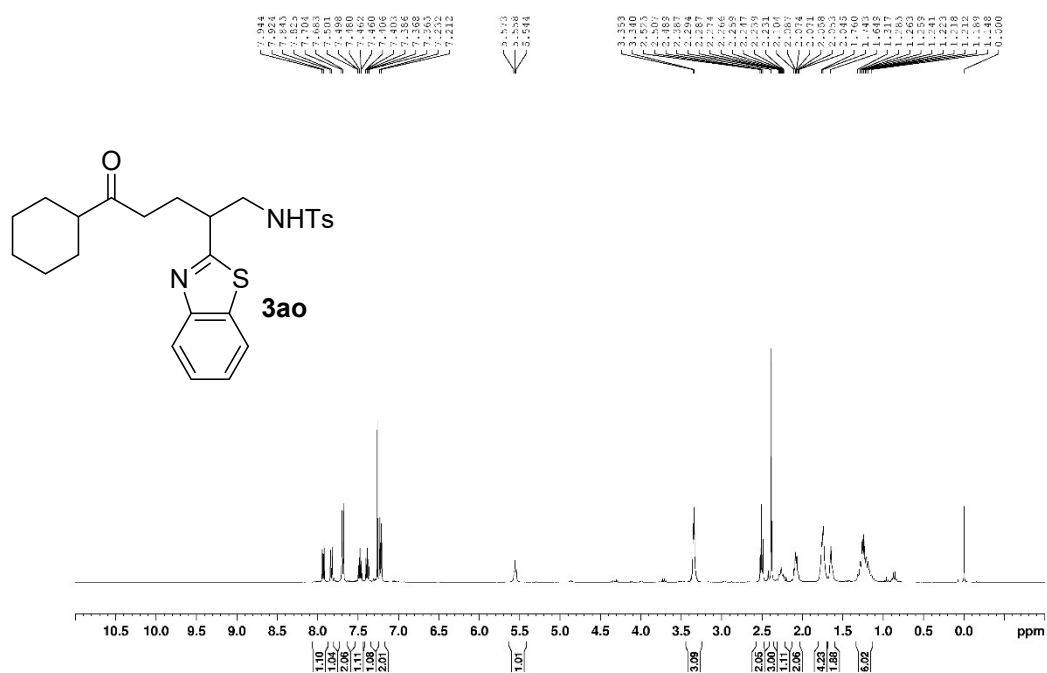

$^{13}\text{C}$  NMR of **3ao** in  $\text{CDCl}_3$  (101 MHz,  $\text{CDCl}_3$ )

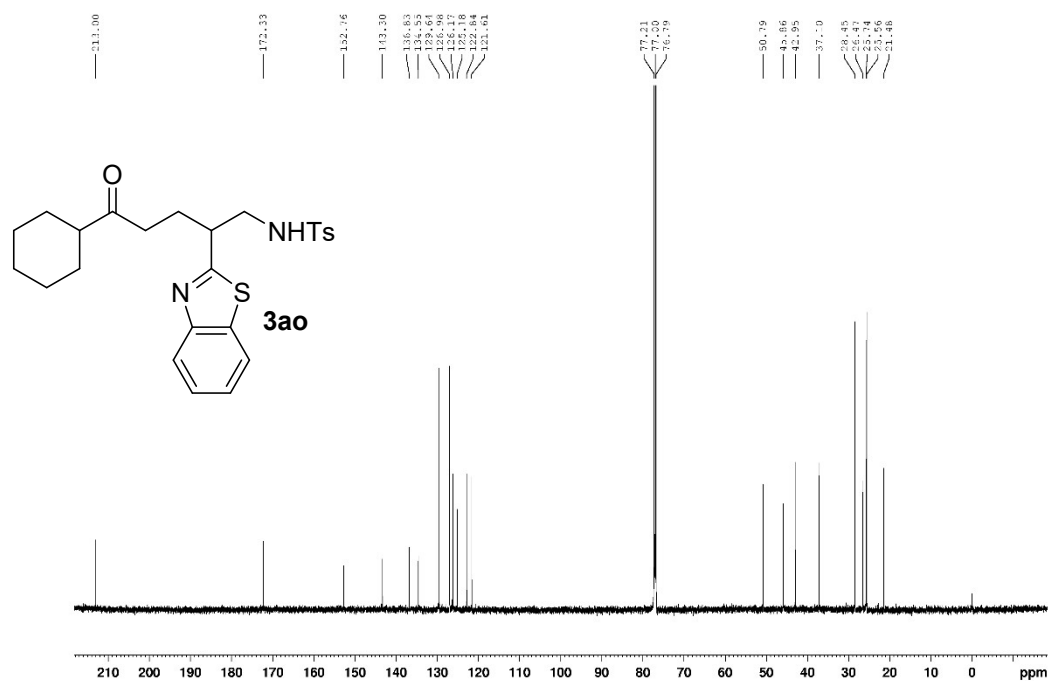

$^1\text{H}$  NMR of **3ap** in  $\text{CDCl}_3$  (400 MHz,  $\text{CDCl}_3$ )

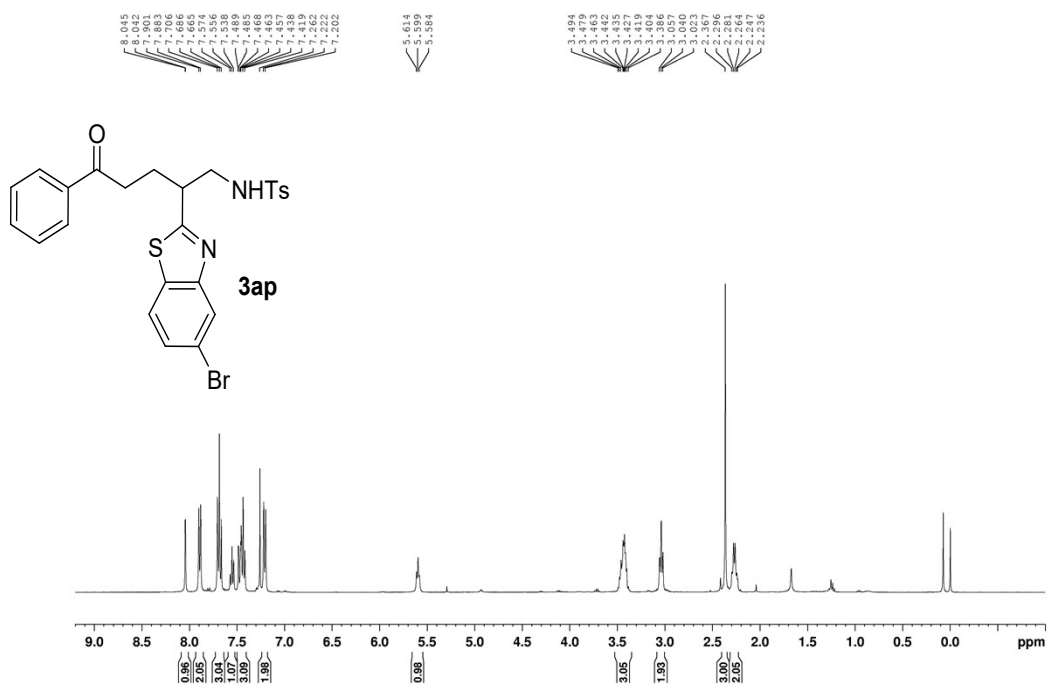

$^{13}\text{C}$  NMR of **3ap** in  $\text{CDCl}_3$  (151 MHz,  $\text{CDCl}_3$ )

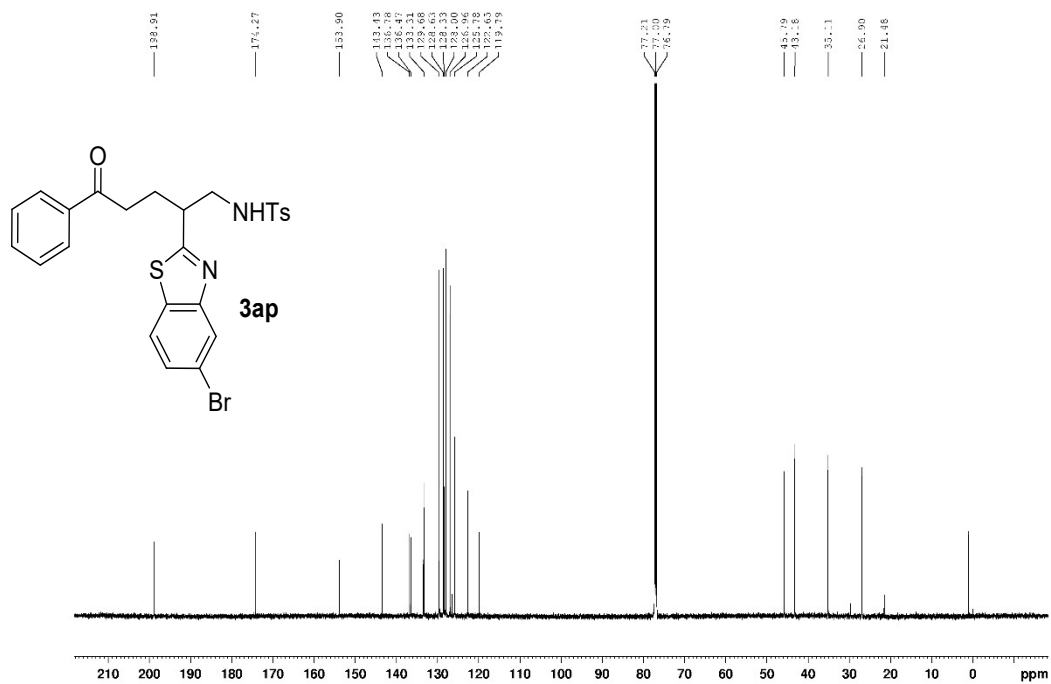

$^1\text{H}$  NMR of **3aq** in  $\text{CDCl}_3$  (600 MHz,  $\text{CDCl}_3$ )

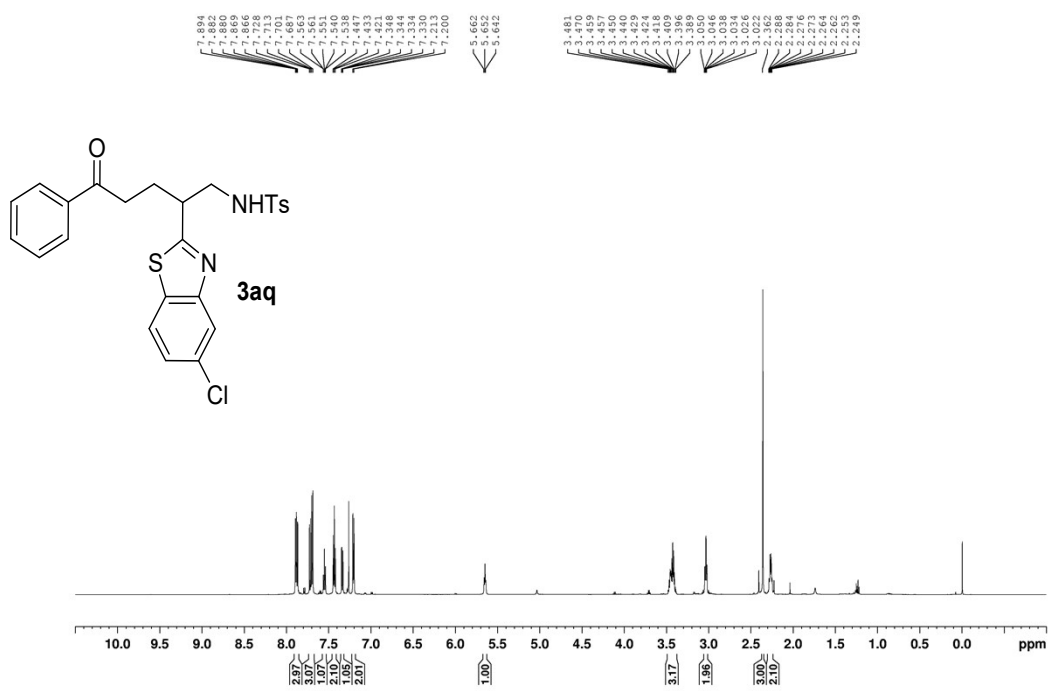

$^{13}\text{C}$  NMR of **3aq** in  $\text{CDCl}_3$  (151 MHz,  $\text{CDCl}_3$ )

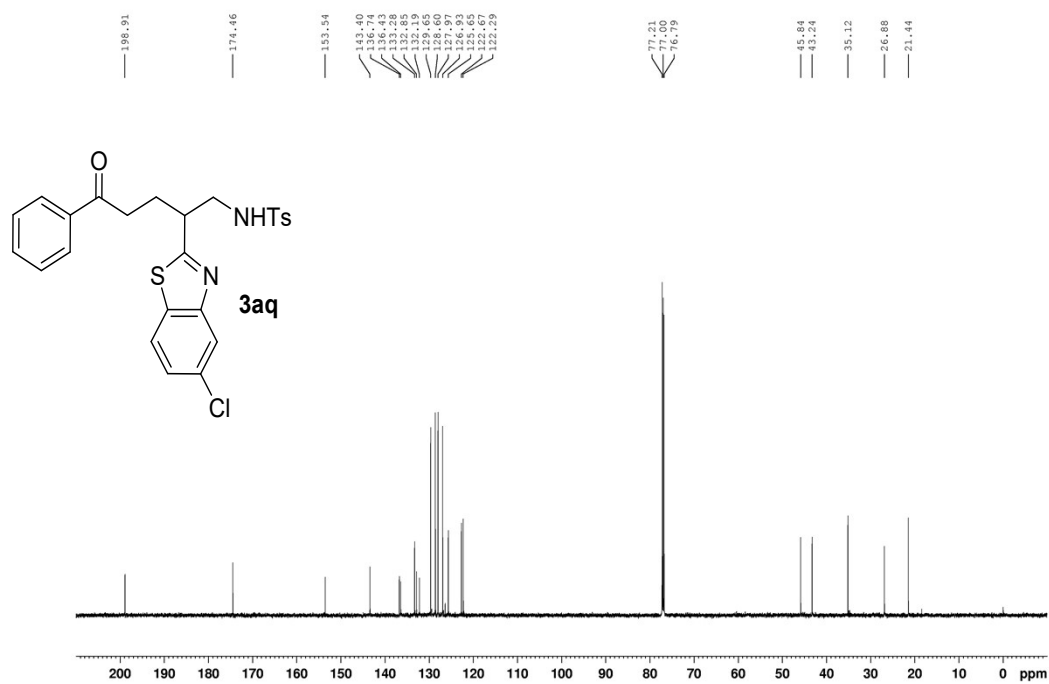

$^1\text{H}$  NMR of **3ar** in  $\text{CDCl}_3$  (600 MHz,  $\text{CDCl}_3$ )

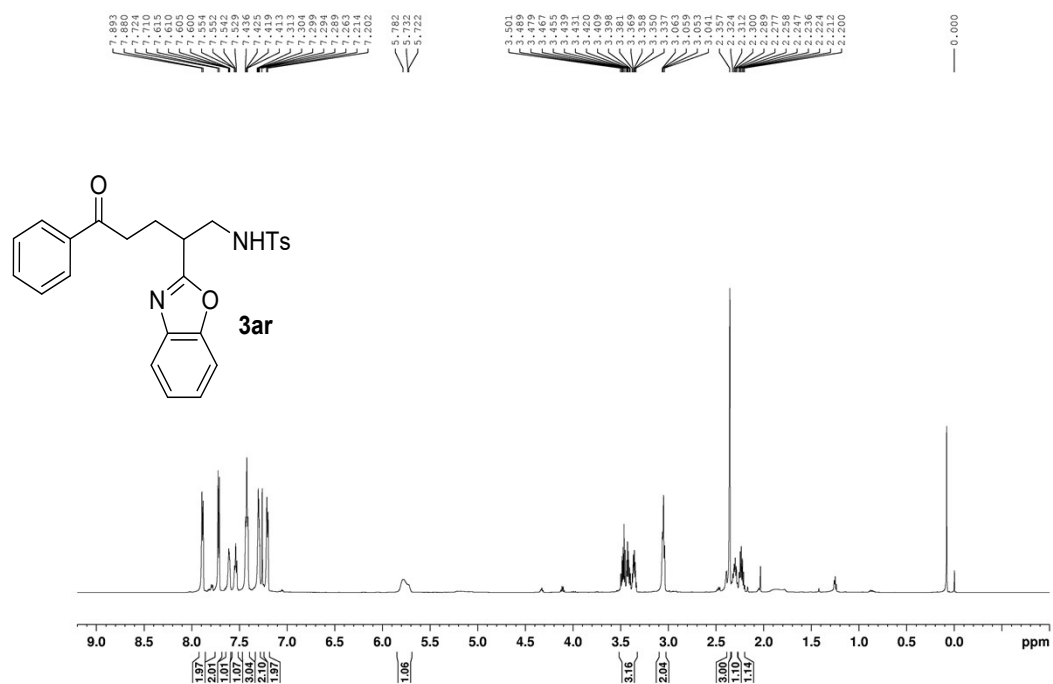

$^{13}\text{C}$  NMR of **3ar** in  $\text{CDCl}_3$  (151 MHz,  $\text{CDCl}_3$ )

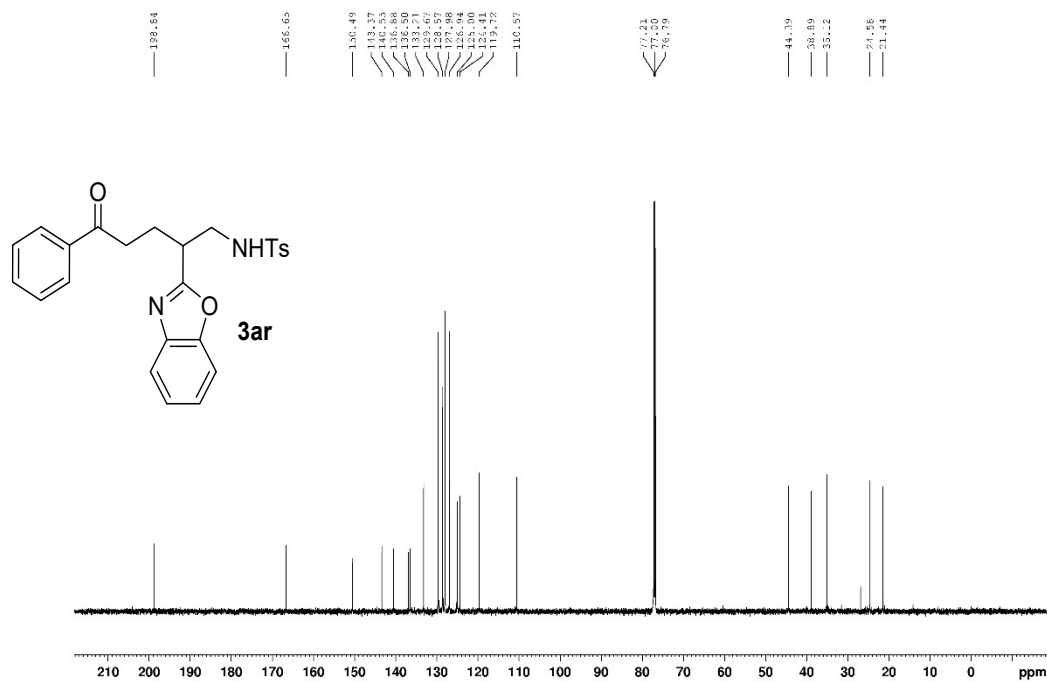

$^1\text{H}$  NMR of **3as** in  $\text{CDCl}_3$  (400 MHz,  $\text{CDCl}_3$ )

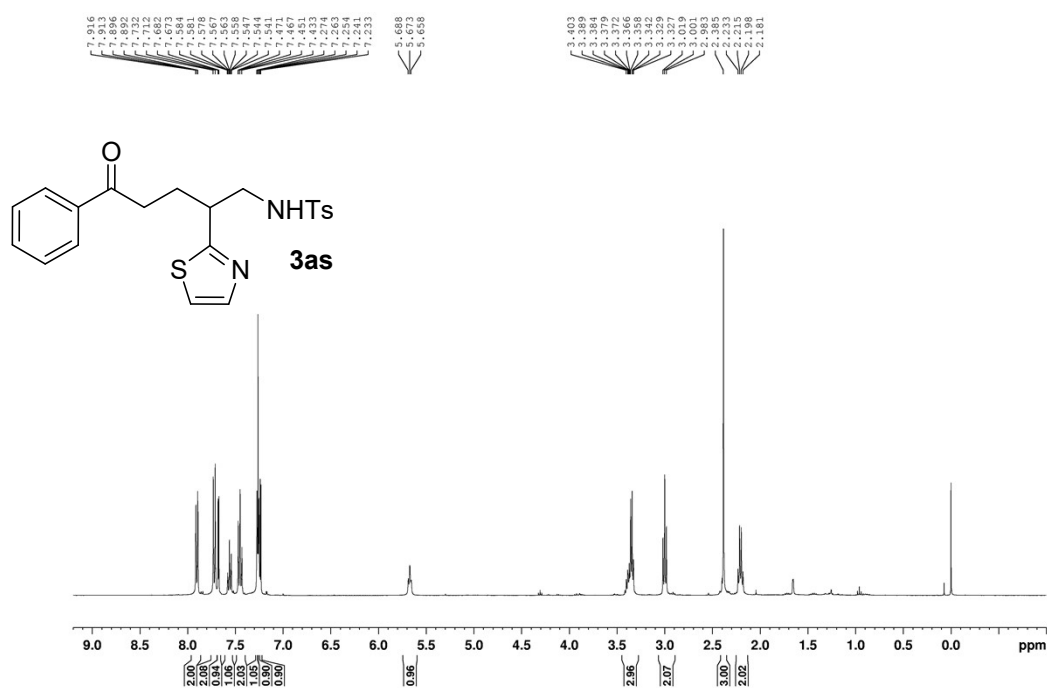



$^{13}\text{C}$  NMR of **3as** in  $\text{CDCl}_3$  (151 MHz,  $\text{CDCl}_3$ )

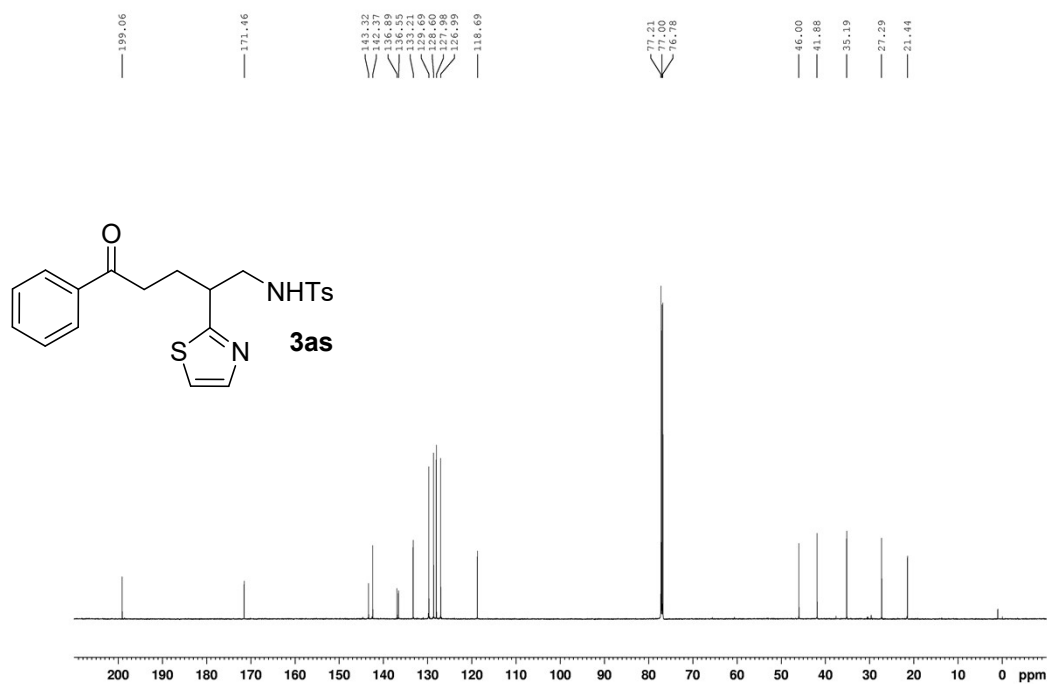

$^1\text{H}$  NMR of **3at** in  $\text{CDCl}_3$  (600 MHz,  $\text{CDCl}_3$ )

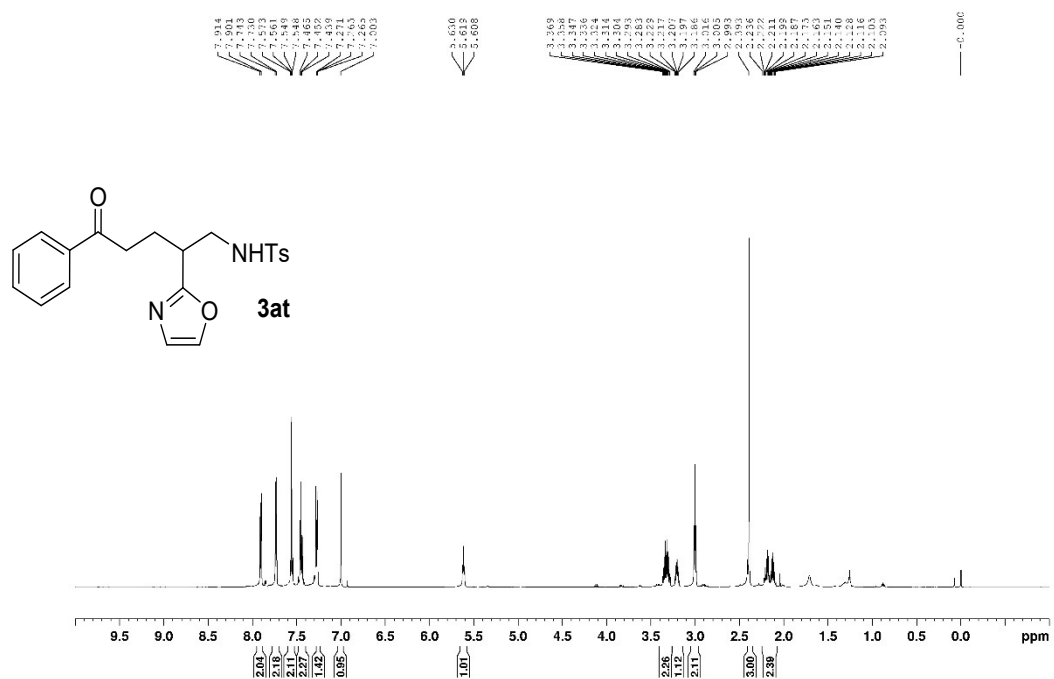

$^{13}\text{C}$  NMR of **3at** in  $\text{CDCl}_3$  (151 MHz,  $\text{CDCl}_3$ )

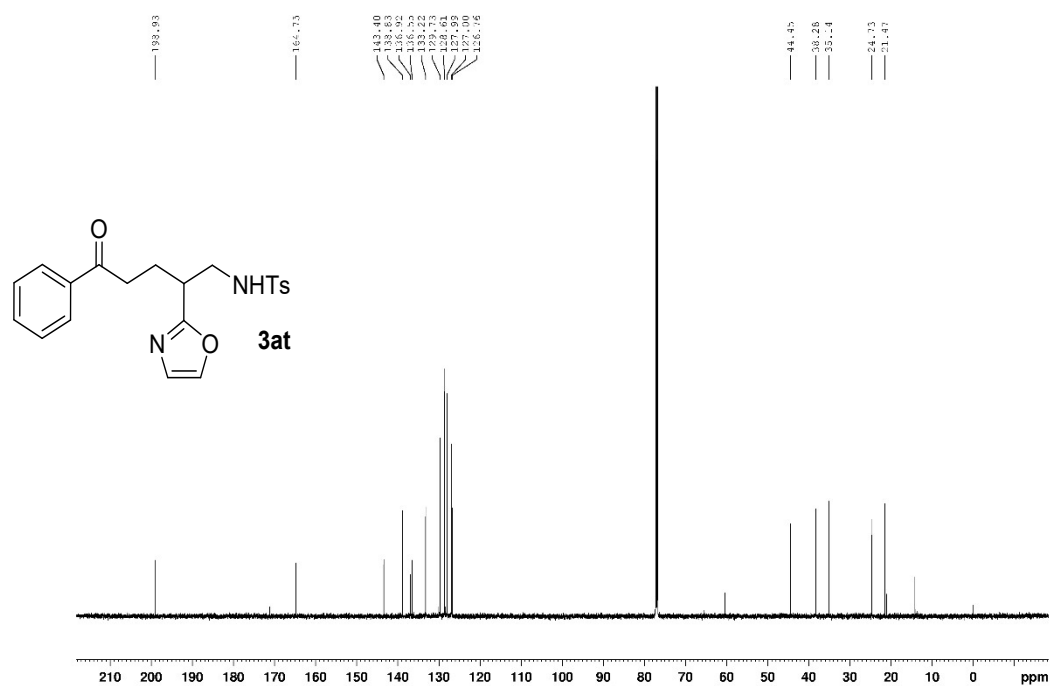

$^1\text{H}$  NMR of **3au** in  $\text{CDCl}_3$  (400 MHz,  $\text{CDCl}_3$ )

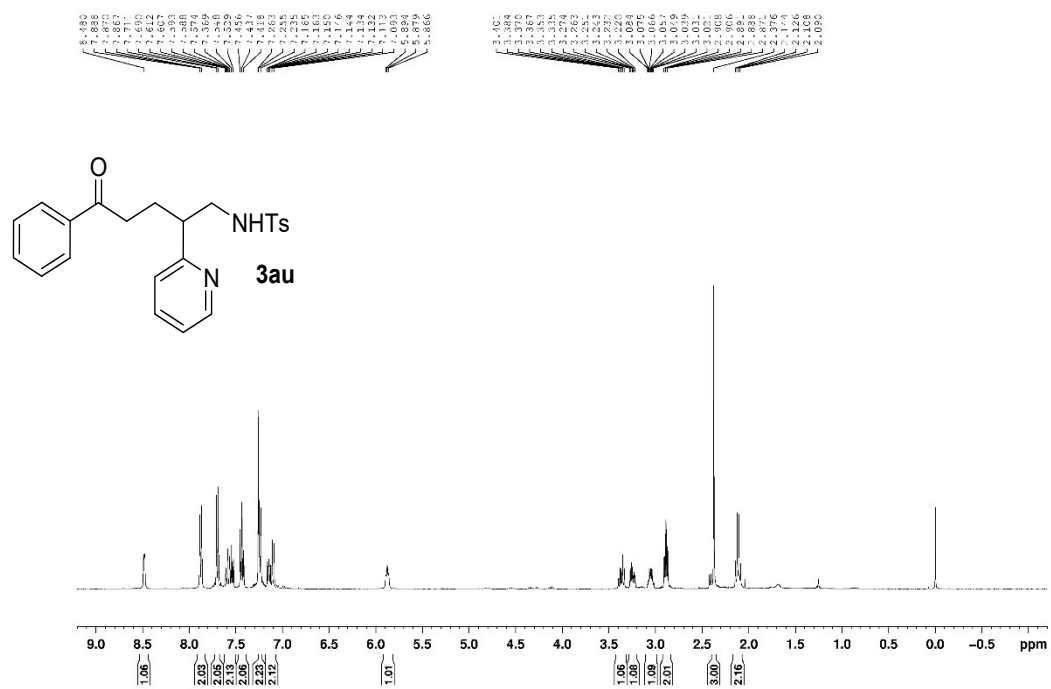

$^{13}\text{C}$  NMR of **3au** in  $\text{CDCl}_3$  (151 MHz,  $\text{CDCl}_3$ )

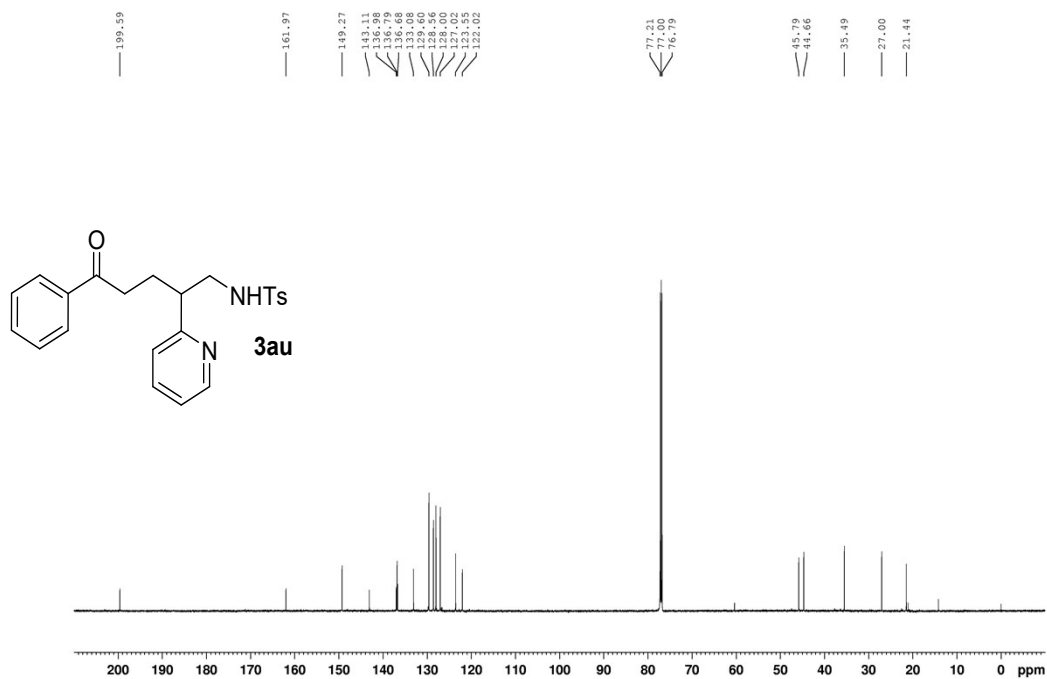

$^1\text{H}$  NMR of **3av** in  $\text{CDCl}_3$  (600 MHz,  $\text{CDCl}_3$ )

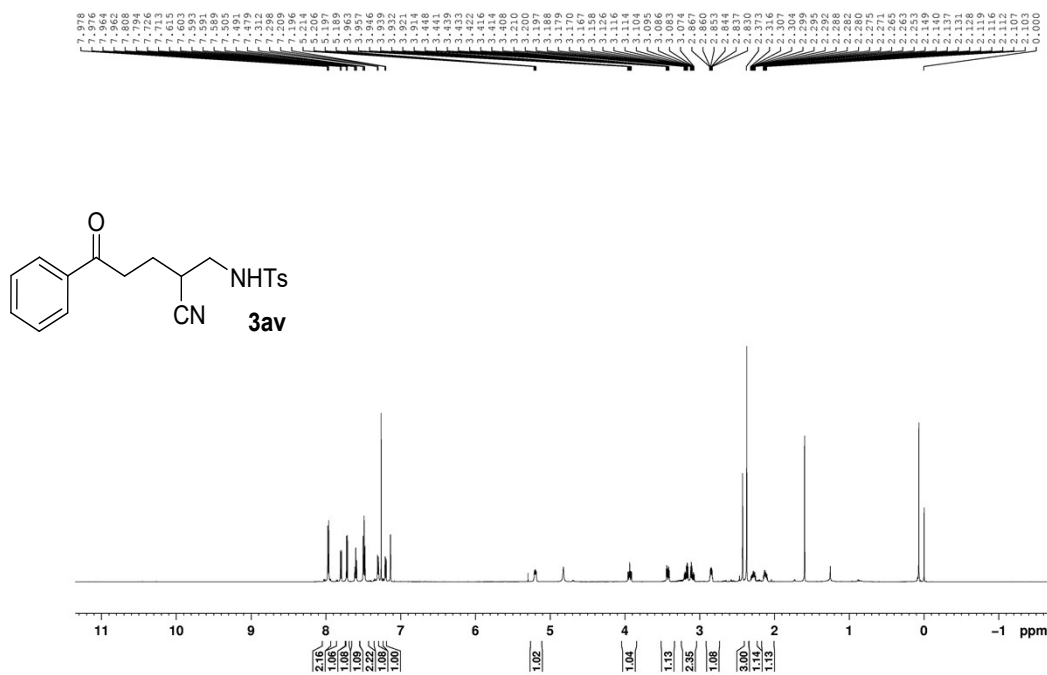

$^{13}\text{C}$  NMR of **3av** in  $\text{CDCl}_3$  (151 MHz,  $\text{CDCl}_3$ )

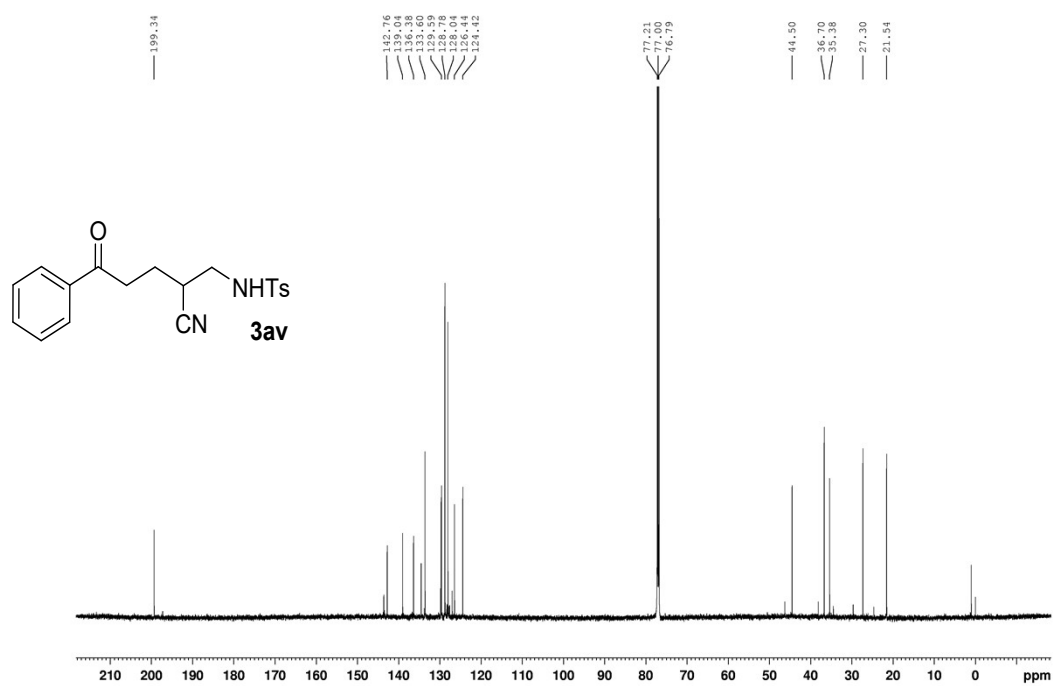

$^1\text{H}$  NMR of **3aw** in  $\text{CDCl}_3$  (400 MHz,  $\text{CDCl}_3$ )

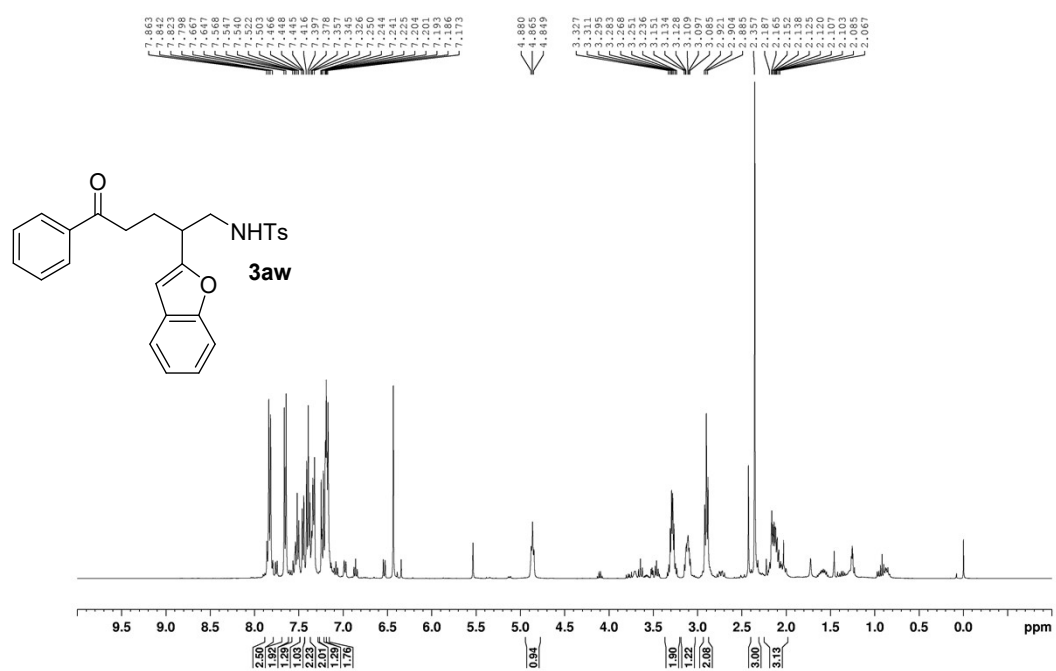

$^{13}\text{C}$  NMR of **3aw** in  $\text{CDCl}_3$  (101 MHz,  $\text{CDCl}_3$ )

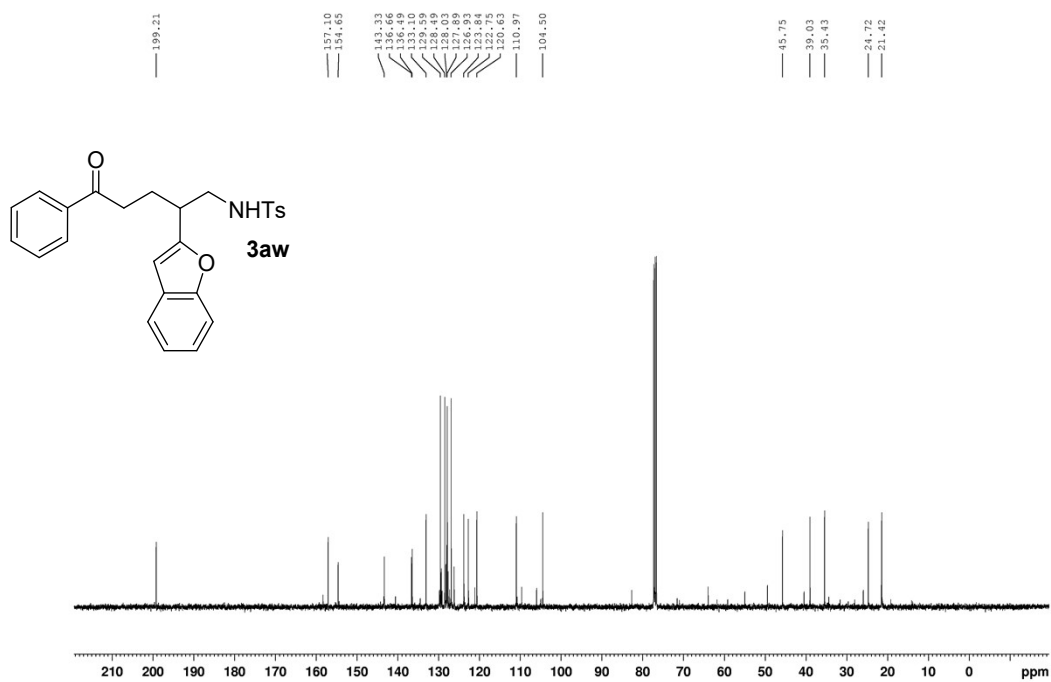

$^1\text{H}$  NMR of **3ax** in  $\text{CDCl}_3$  (400 MHz,  $\text{CDCl}_3$ )

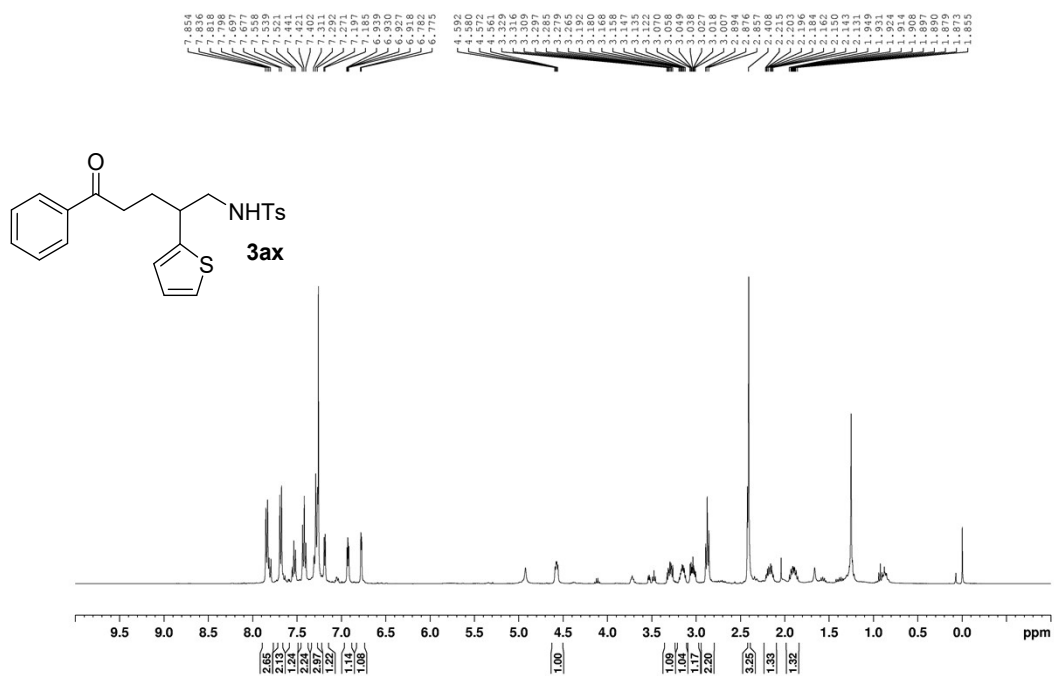

$^{13}\text{C}$  NMR of **3ax** in  $\text{CDCl}_3$  (101 MHz,  $\text{CDCl}_3$ )

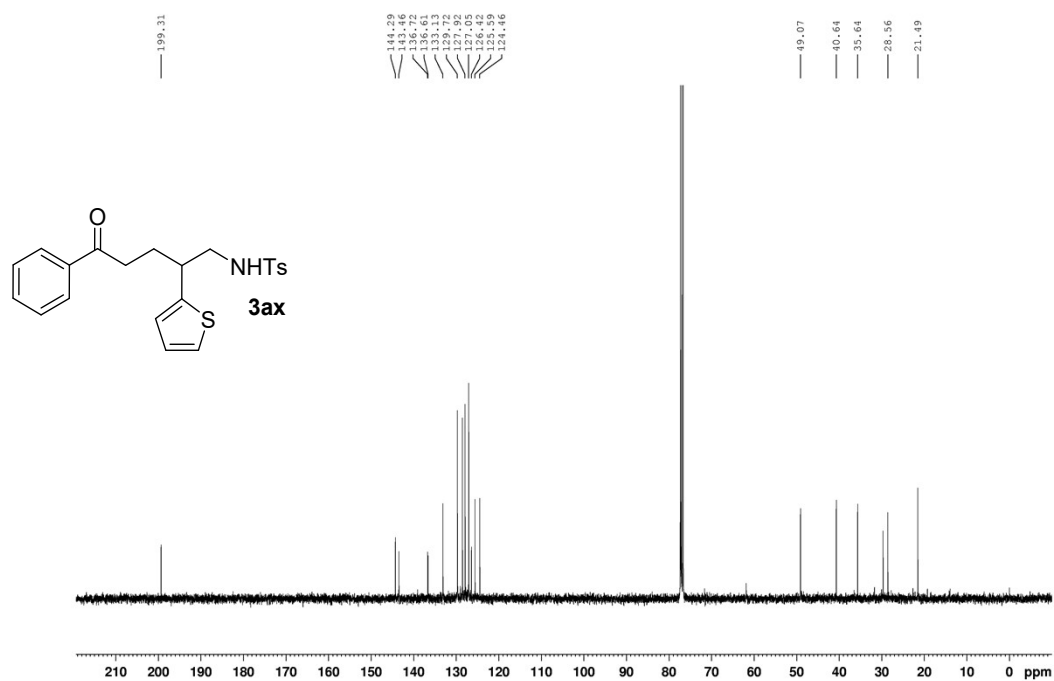

$^1\text{H}$  NMR of **3ba** in  $\text{CDCl}_3$  (400 MHz,  $\text{CDCl}_3$ )

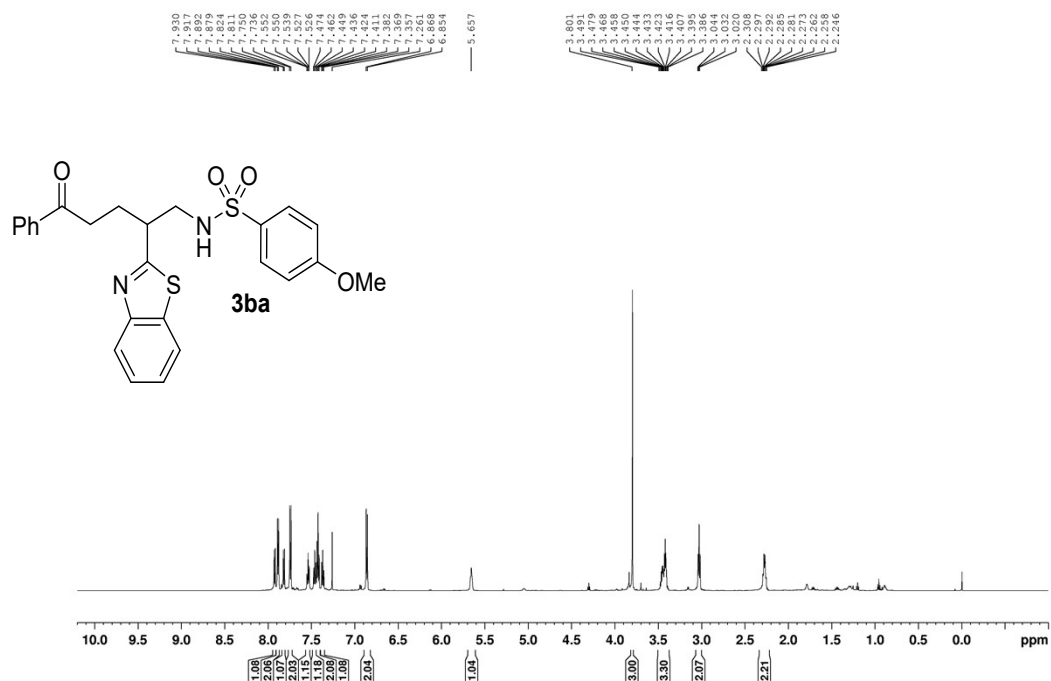

$^{13}\text{C}$  NMR of **3ba** in  $\text{CDCl}_3$  (151 MHz,  $\text{CDCl}_3$ )

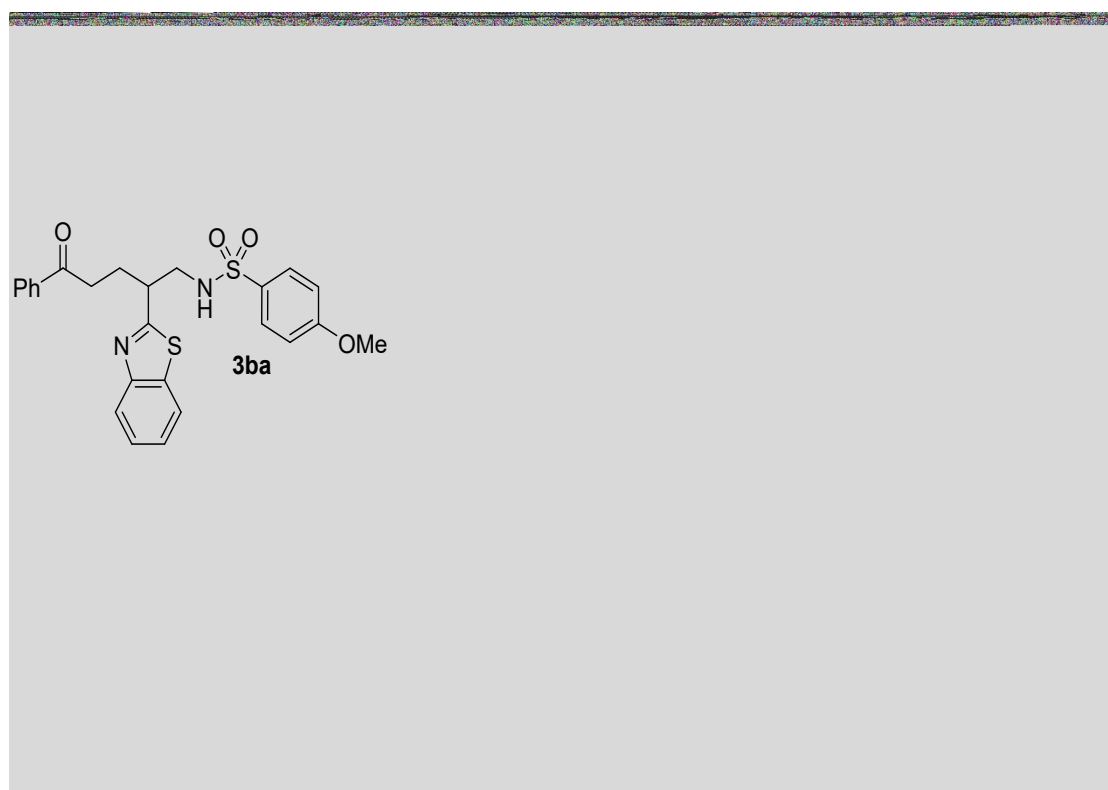

$^1\text{H}$  NMR of **3ca** in  $\text{CDCl}_3$  (400 MHz,  $\text{CDCl}_3$ )

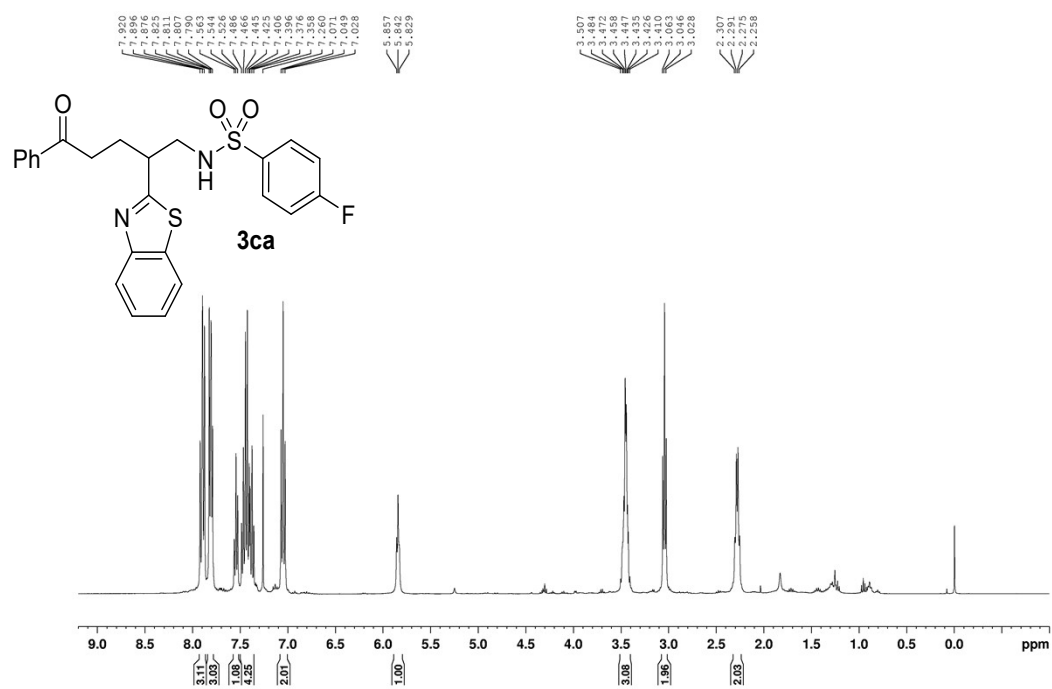

$^{13}\text{C}$  NMR of **3ca** in  $\text{CDCl}_3$  (101 MHz,  $\text{CDCl}_3$ )

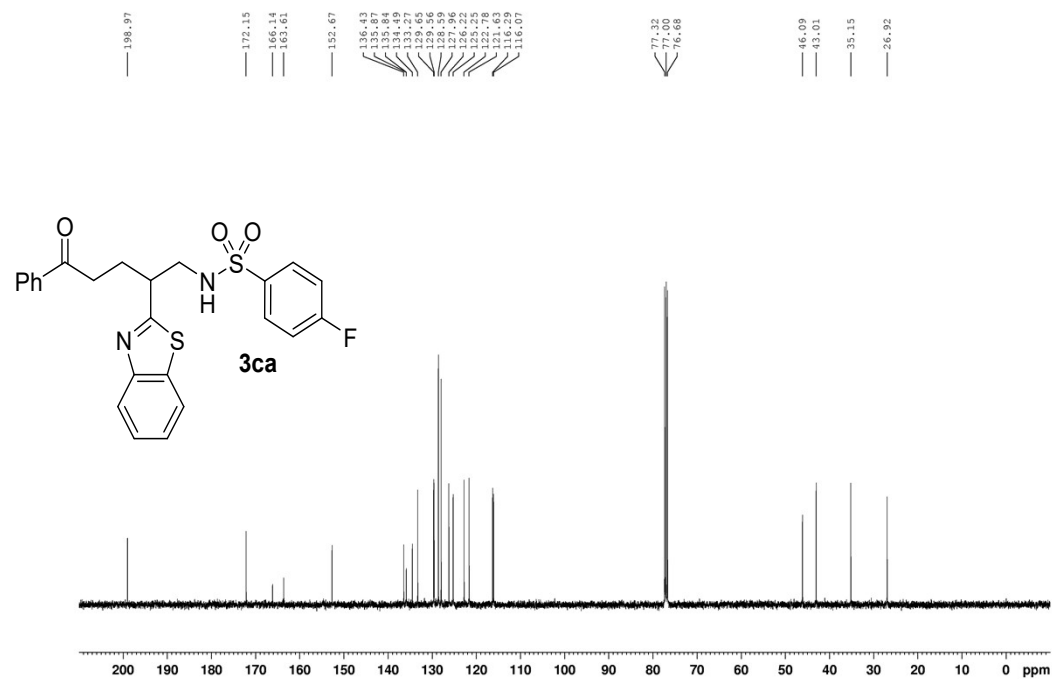

$^{19}\text{F}$  NMR of **3ca** in  $\text{CDCl}_3$  (376 MHz,  $\text{CDCl}_3$ )

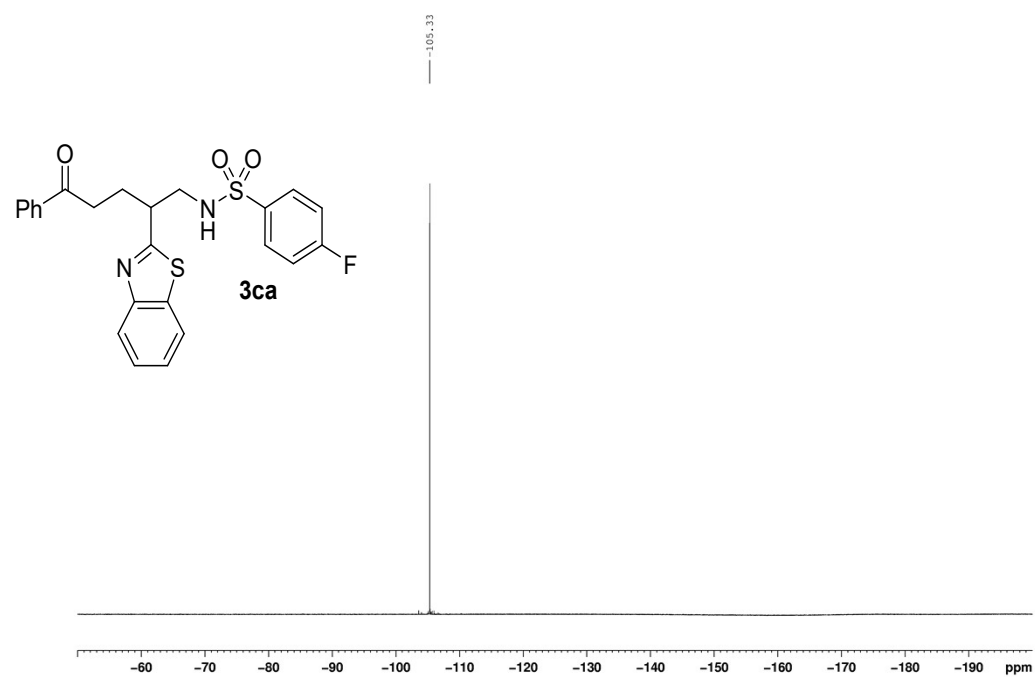



$^1\text{H}$  NMR of **3da** in  $\text{CDCl}_3$  (400 MHz,  $\text{CDCl}_3$ )

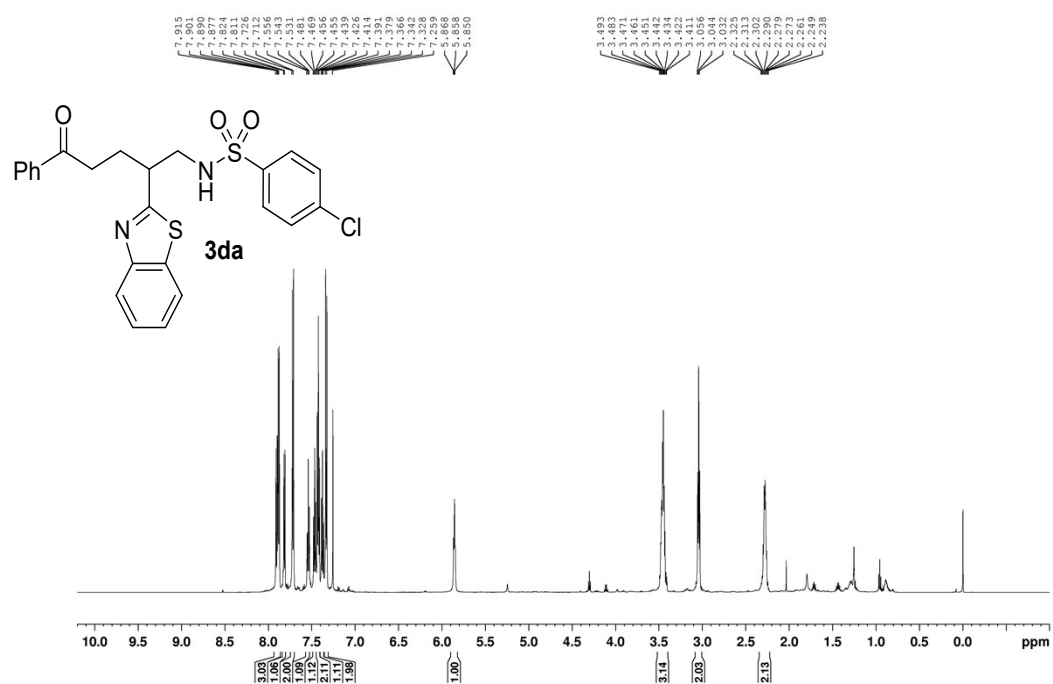

$^{13}\text{C}$  NMR of **3da** in  $\text{CDCl}_3$  (151 MHz,  $\text{CDCl}_3$ )

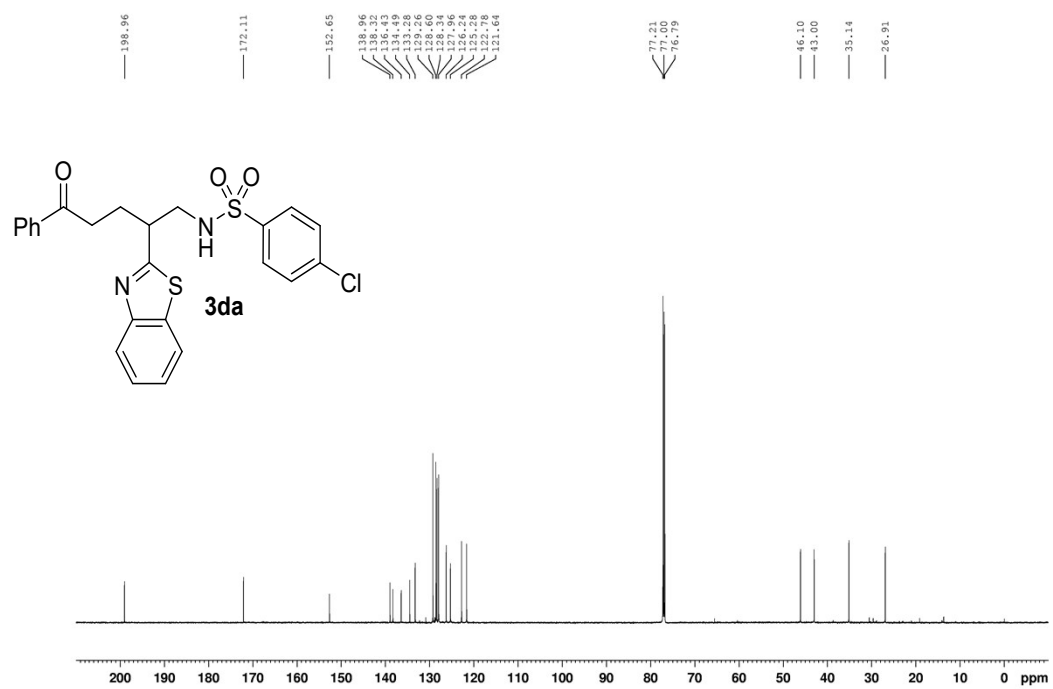

$^1\text{H}$  NMR of **3ea** in  $\text{CDCl}_3$  (600 MHz,  $\text{CDCl}_3$ )

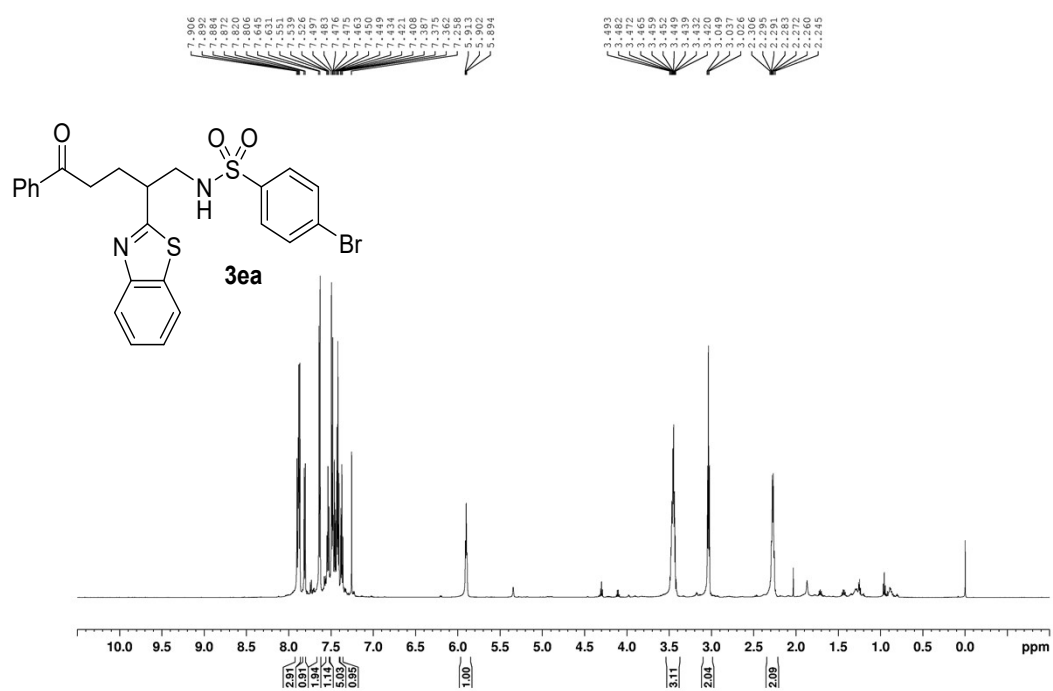

$^{13}\text{C}$  NMR of **3ea** in  $\text{CDCl}_3$  (151 MHz,  $\text{CDCl}_3$ )

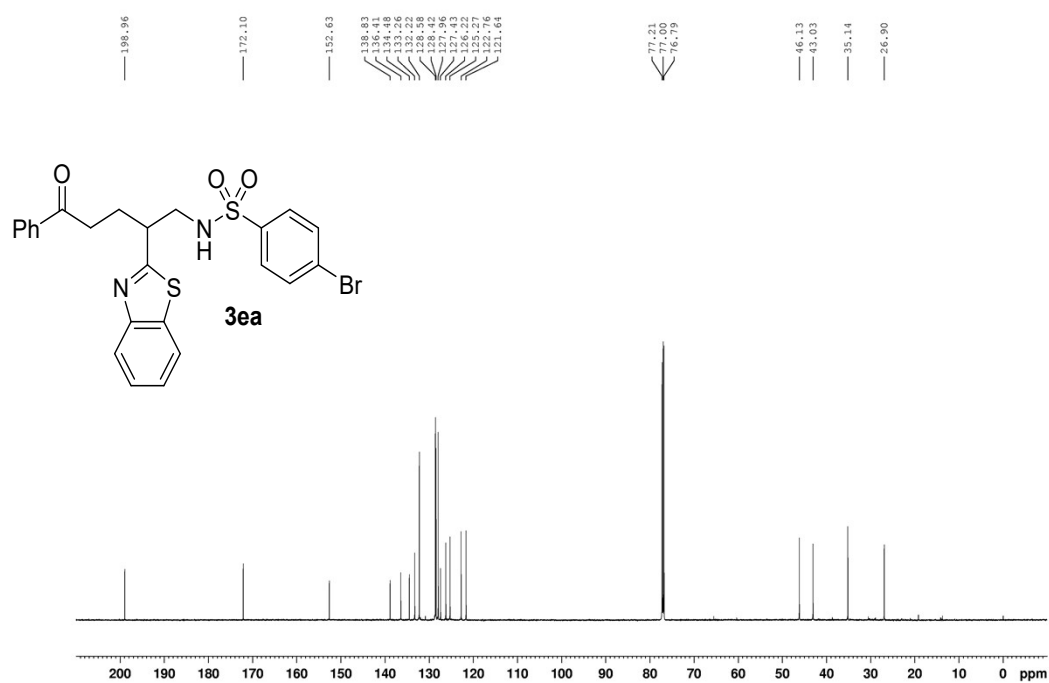

$^1\text{H}$  NMR of **3fa** in  $\text{CDCl}_3$  (400 MHz,  $\text{CDCl}_3$ )

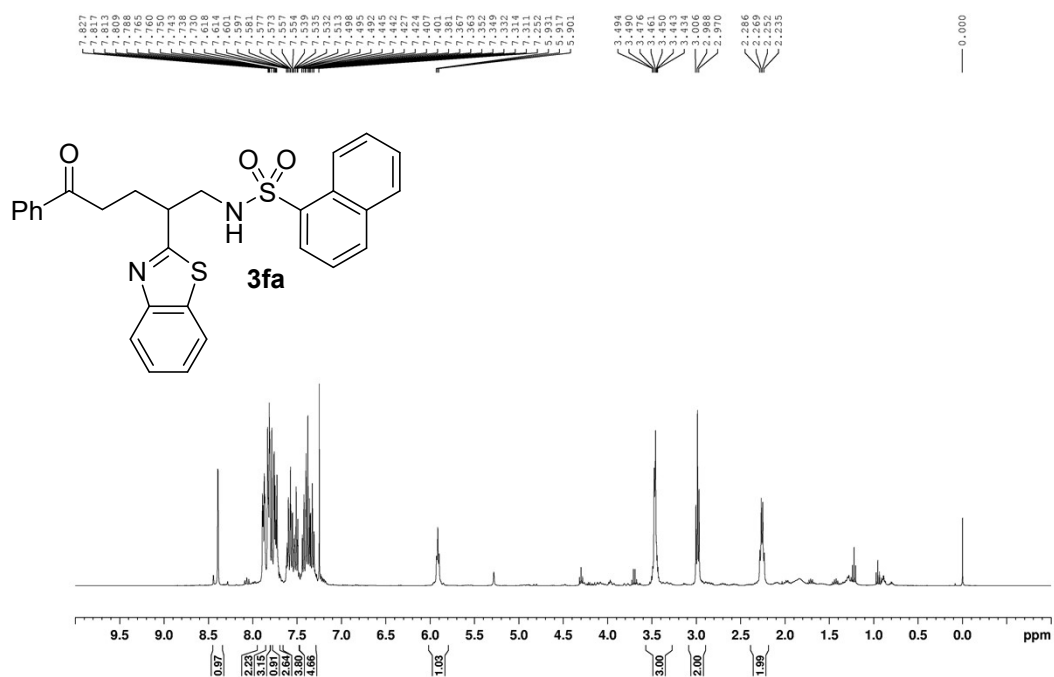

$^{13}\text{C}$  NMR of **3fa** in  $\text{CDCl}_3$  (101 MHz,  $\text{CDCl}_3$ )

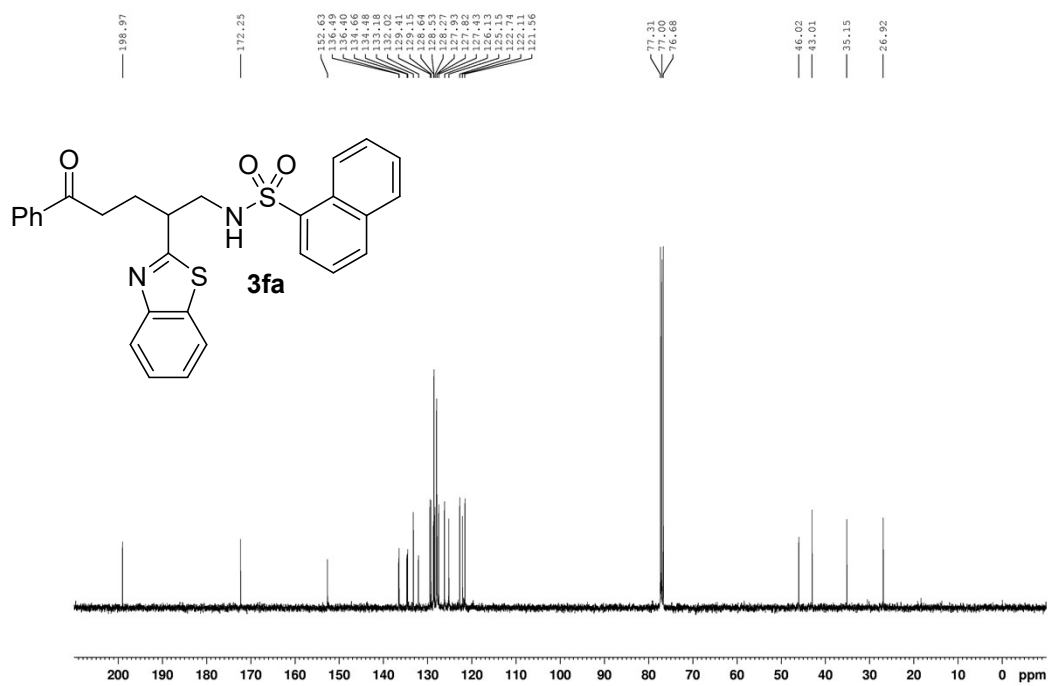

$^1\text{H}$  NMR of **3ga** in  $\text{CDCl}_3$  (600 MHz,  $\text{CDCl}_3$ )

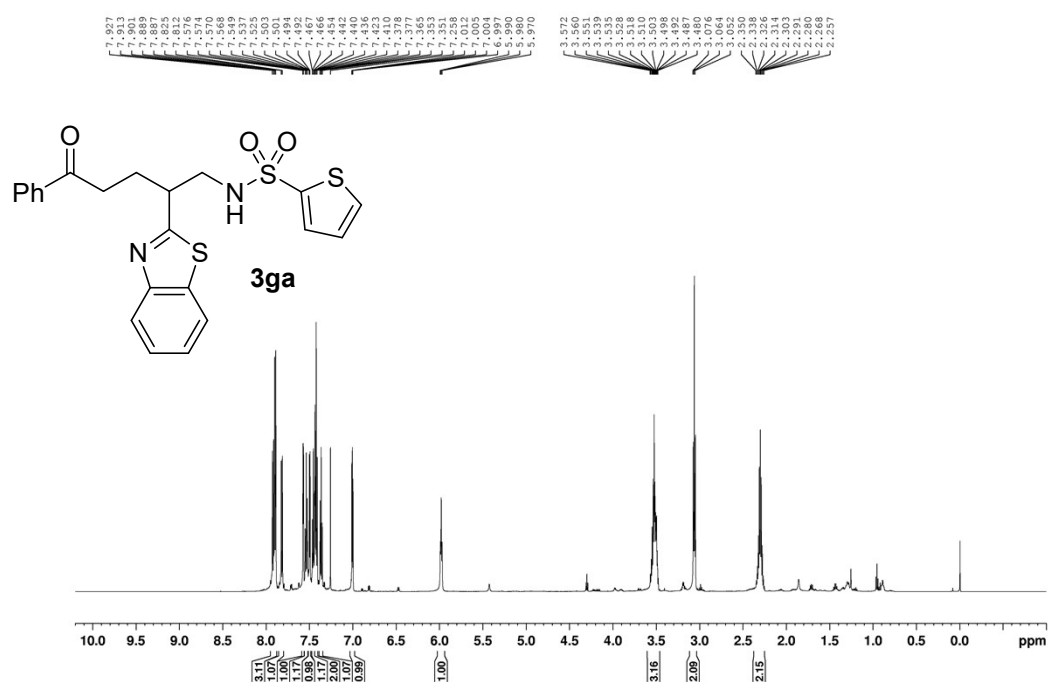

$^{13}\text{C}$  NMR of **3ga** in  $\text{CDCl}_3$  (151 MHz,  $\text{CDCl}_3$ )

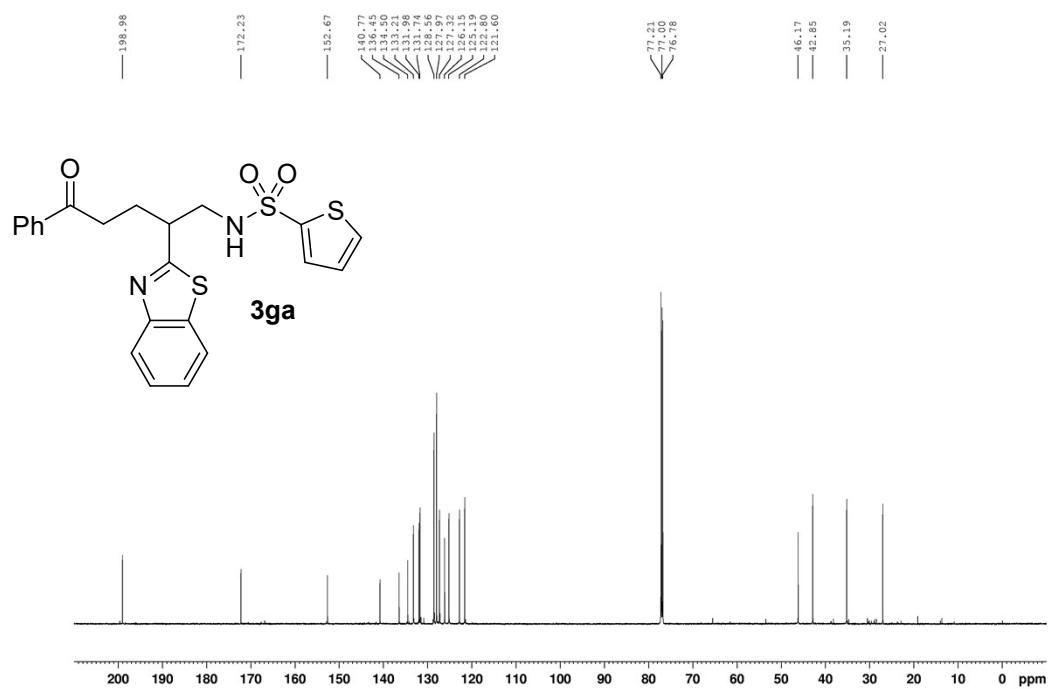

$^1\text{H}$  NMR of **3ha** in  $\text{CDCl}_3$  (600 MHz,  $\text{CDCl}_3$ )

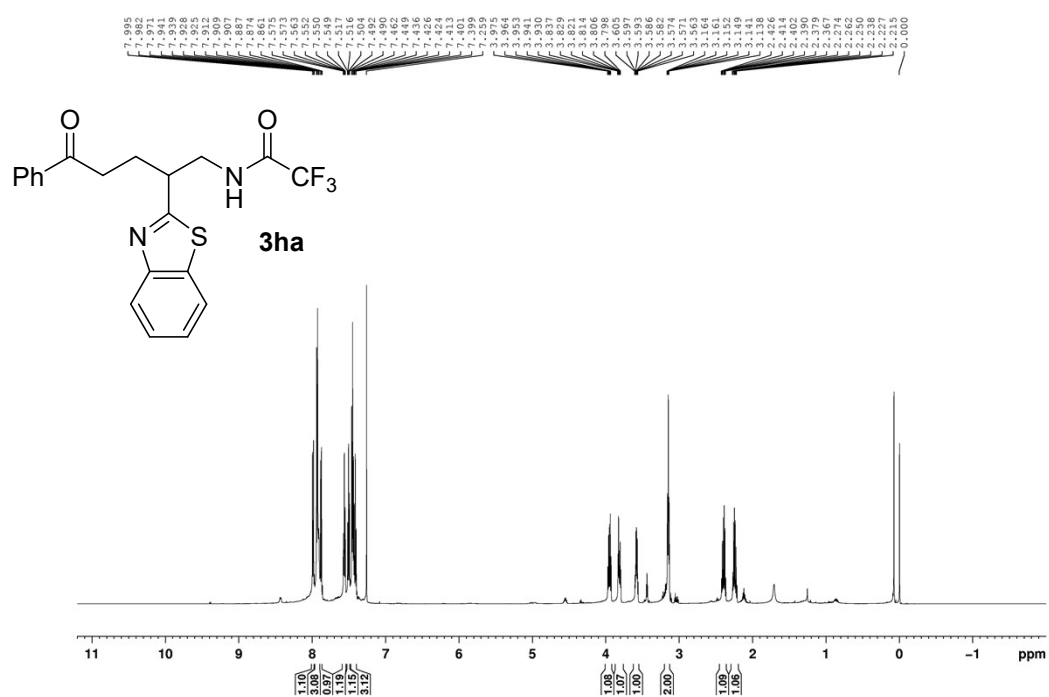

$^{13}\text{C}$  NMR of **3ha** in  $\text{CDCl}_3$  (151 MHz,  $\text{CDCl}_3$ )

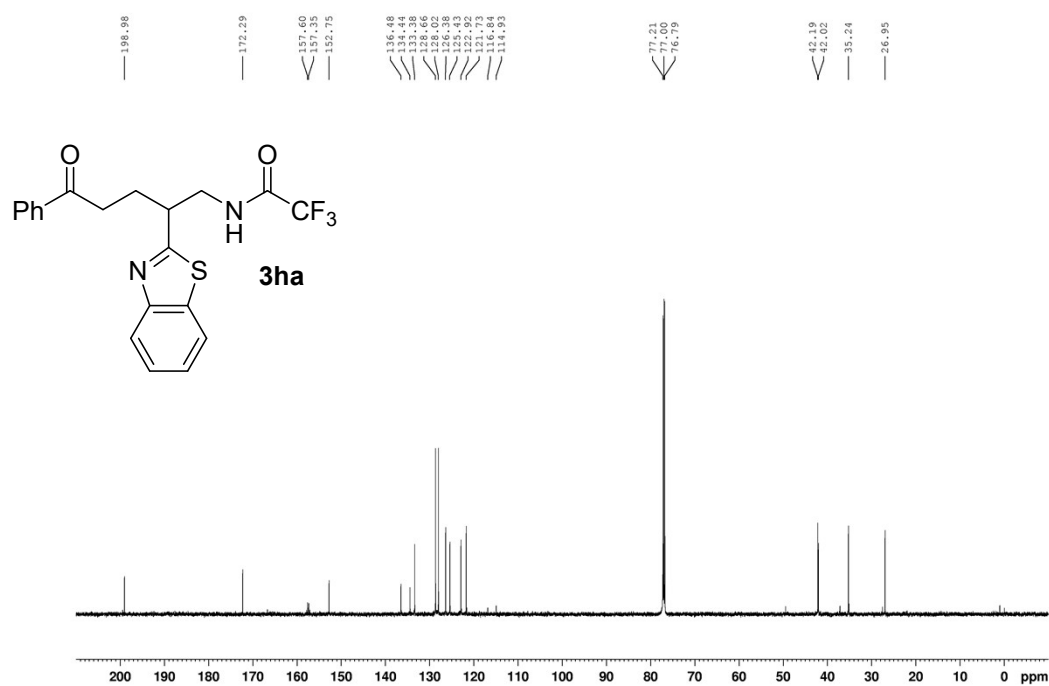

$^{19}\text{F}$  NMR of **3ha** in  $\text{CDCl}_3$  (376 MHz,  $\text{CDCl}_3$ )

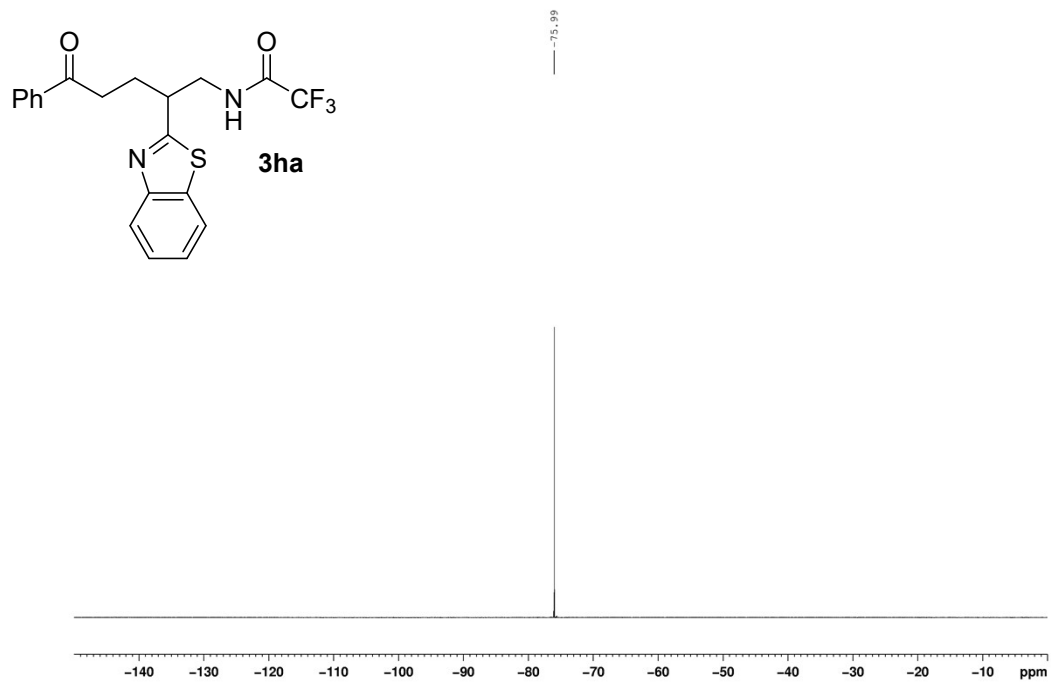

$^1\text{H}$  NMR of **4aa** in  $\text{CDCl}_3$  (600 MHz,  $\text{CDCl}_3$ )

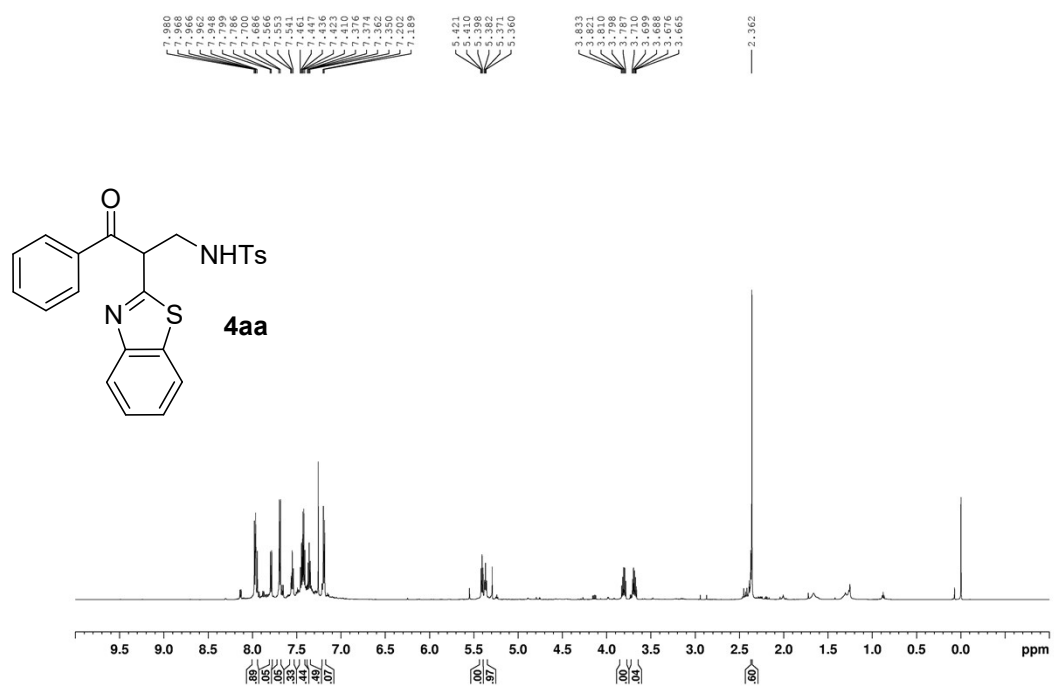

<sup>13</sup>C NMR of **4aa** in CDCl<sub>3</sub> (151 MHz, CDCl<sub>3</sub>)

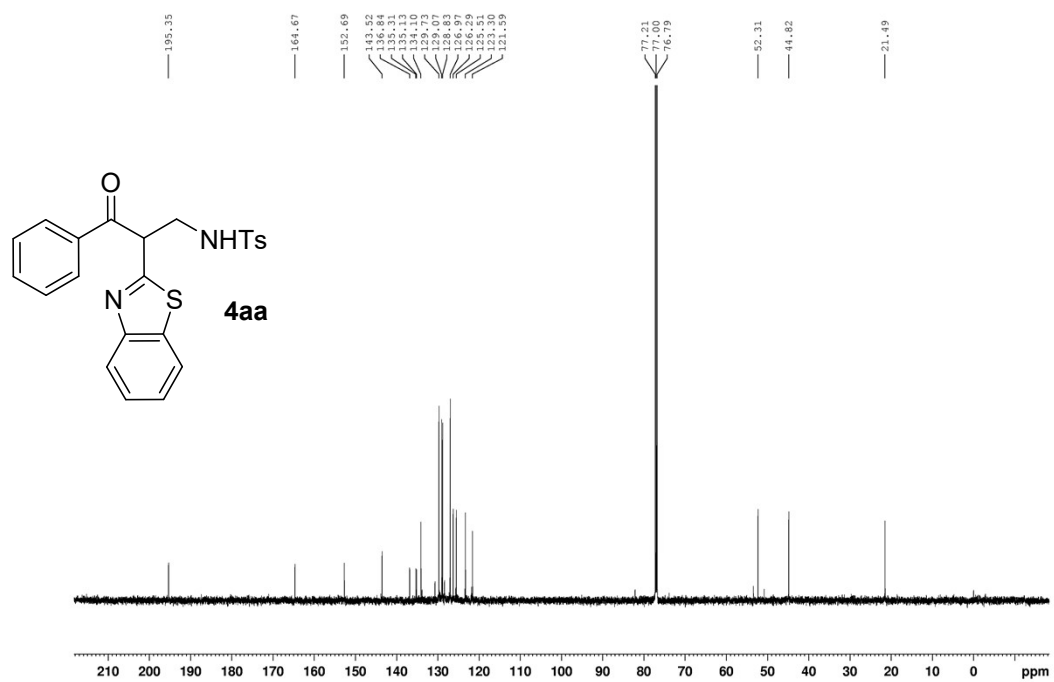

<sup>1</sup>H NMR of **4ac** in CDCl<sub>3</sub> (600 MHz, CDCl<sub>3</sub>)

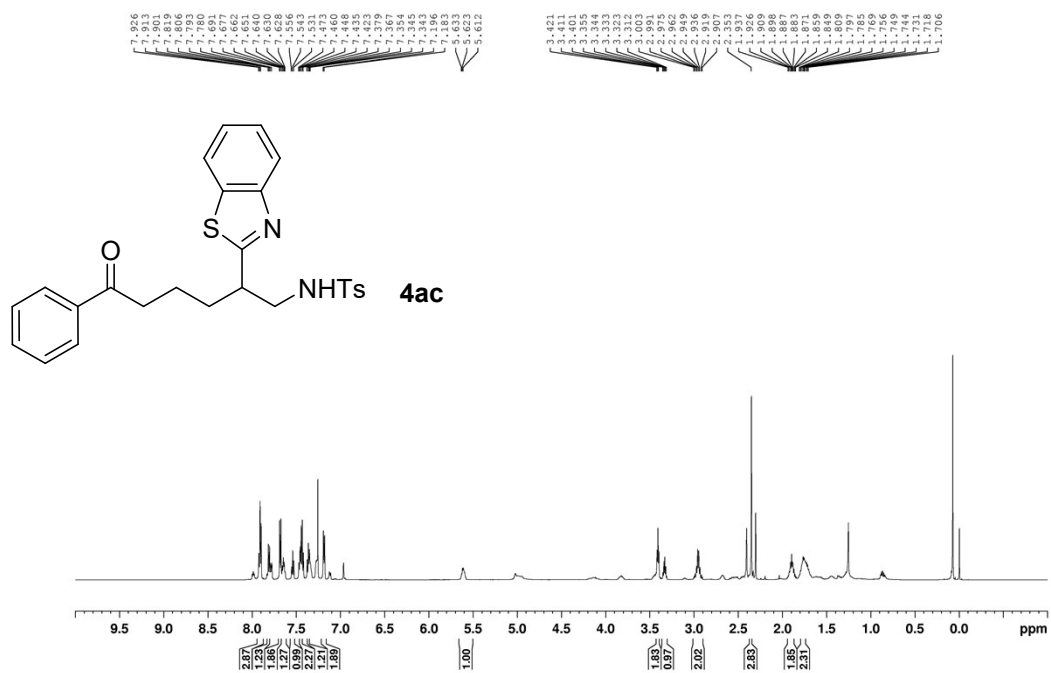

**<sup>13</sup>C NMR of 4ac in CDCl<sub>3</sub> (151 MHz, CDCl<sub>3</sub>)**

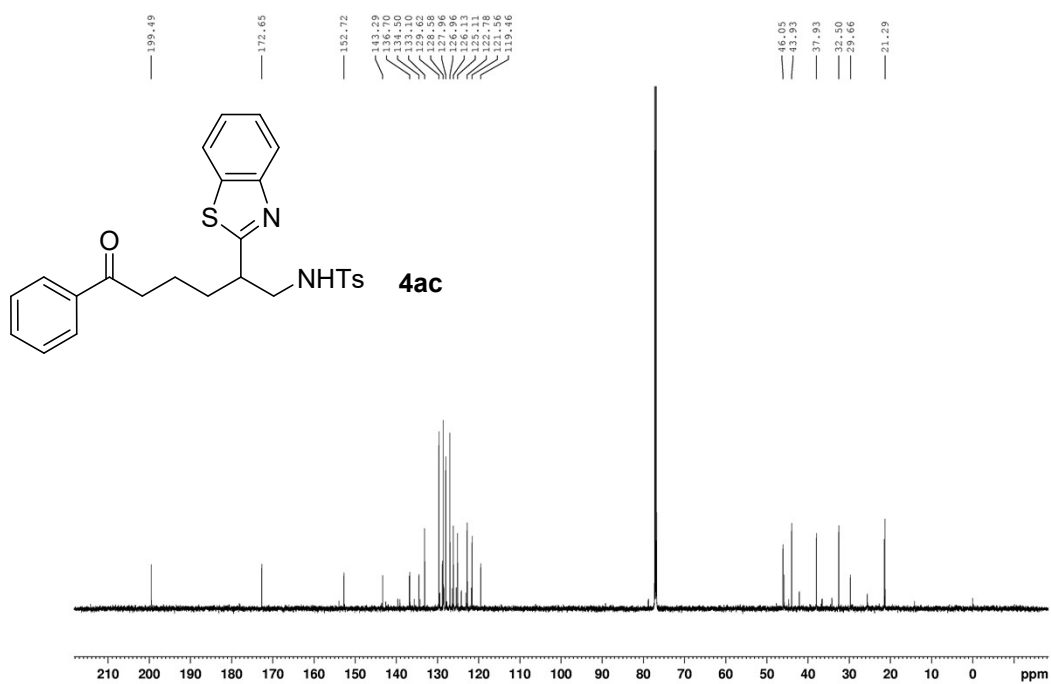

**<sup>1</sup>H NMR of 5 in CDCl<sub>3</sub> (400 MHz, CDCl<sub>3</sub>)**





$^1\text{H}$  NMR of **6** in  $\text{CDCl}_3$  (400 MHz,  $\text{CDCl}_3$ )

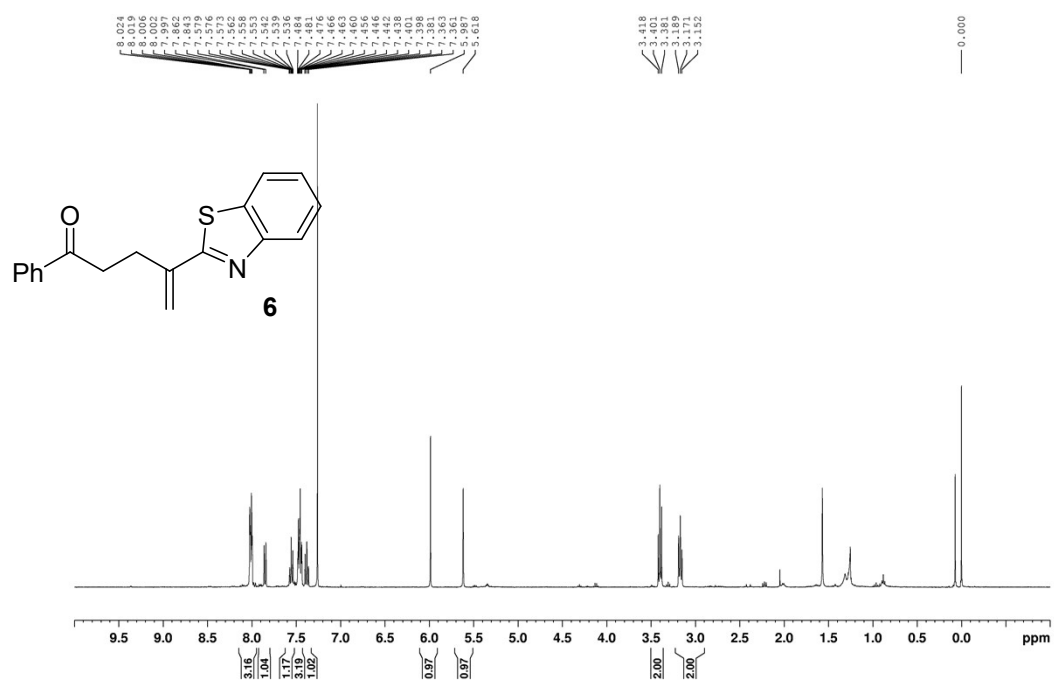

$^{13}\text{C}$  NMR of **6** in  $\text{CDCl}_3$  (101 MHz,  $\text{CDCl}_3$ )

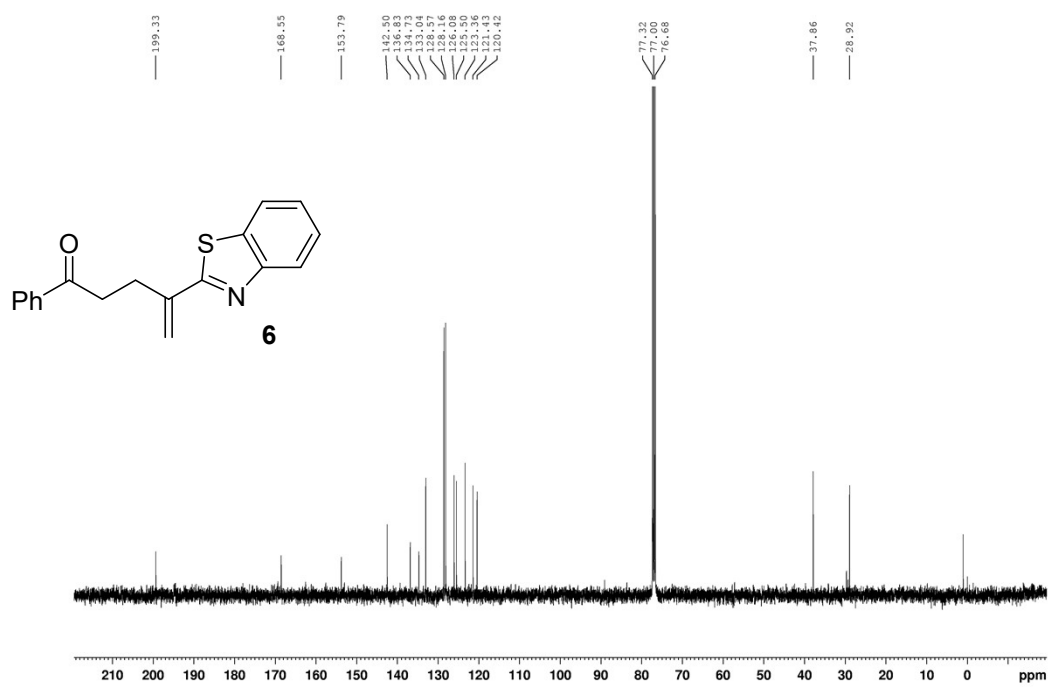



- (1) Yu, W.-L.; Chen, J.-Q.; Wei, Y.-L.; Wang, Z.-Y.; Xu, P.-F., Alkene functionalization for the stereospecific synthesis of substituted aziridines by visible-light photoredox catalysis. *Chemical Communications* **2018**, 54, 1948-1951.
- (2) Tian, T.; Wang, X.; Lv, L.; Li, Z., Iron-catalyzed acylation-functionalization of unactivated alkenes with aldehydes. *Chemical Communications* **2020**, 56, 14637-14640.
- (3) Yi, M.-J.; Zhang, H.-X.; Xiao, T.-F.; Zhang, J.-H.; Feng, Z.-T.; Wei, L.-P.; Xu, G.-Q.; Xu, P.-F., Photoinduced Metal-Free  $\alpha$ -C(sp<sup>3</sup>)-H Carbamoylation of Saturated Aza-Heterocycles via Rationally Designed Organic Photocatalyst. *ACS Catalysis* **2021**, 11, 3466-3472.
- (4) Hu, W.; Guo, Z.; Chu, F.; Bai, A.; Yi, X.; Cheng, G.; Li, J., Synthesis and biological evaluation of substituted 2-sulfonyl-phenyl-3-phenyl-indoles: a new series of selective COX-2 inhibitors. *Bioorganic & Medicinal Chemistry* **2003**, 11, 1153-1160.
- (5) Cismesiaa, M. A.; Yoon, T. P. Correction: Characterizing chain processes in visible light photoredox catalysis. *Chem. Sci.* **2015**, 6, 6019–6019.
- (6) Hatchard, C. G.; Parker, C. A. *Proc. Roy. Soc. (London)* **1956**, A235, 518-536.
- (7) (a) Kuhn, H. J.; Braslavsky, S. E.; Schmidt, R. *Pure Appl. Chemical actinometry (IUPAC Technical Report)* *Chem.* **2004**, 76, 2105–2146. (b) Monalti, M. *Chemical Actinometry. Handbook of Photochemistry*, 3rd Ed; Taylor & Francis Group, LLC. Boca Raton, FL, **2006**, 601–616.
- (8) Y. Zhao, D. G. Truhlar, *Theor. Chem. Acc.* **2008**, 120, 215–241.
- (9) S. Grimme, J. Antony, S. Ehrlich, H. Krieg, *J Chem Phys* **2010**, 132: 154104.
- (10) A. V. Marenich, C. J. Cramer, D. G. Truhlar, *J. Phys. Chem. B* **2009**, 113, 6378–6396.
- (11) M. J. Frisch, G. W. Trucks, H. B. Schlegel, G. E. Scuseria, D. J. Fox, Gaussian 09 Revision A.1. Gaussian Inc. **2009**.
- (12) R. Dennington, T. Keith, J. Millam, Semichem Inc., Shawnee Mission KS, GaussView, Version 5, **2009**
- (13) T. Lu, F. Chen, *J. Comput.Chem.* **2012**, 33, 580–592.
- (14) W. Humphrey, A. Dalke and K. Schulten, VMD: visual molecular dynamics, *J. Mol. Graphics*, 1996, 14, 33–38.
